# Supplementary material
Source: PubMed Central journal article supplement (PMC193632)

This is a graphical display of the proposed *S. cerevisiae* annotation changes based on comparison to *A. gossypii*.

Figures are ordered according to the systematic name of the *S. cerevisiae* gene for which we suggest annotation/sequence change (from YAL to YPR).

*S. cerevisiae* annotation based on SGD (October 2000) are drawn in blue, proposed changes inferred by comparison to *A. gossypii* in red.

These figures were created using the Artemis annotation tool from the Sanger Center:

Rutherford K, Parkhill J, Crook J, Horsnell T, Rice P, Rajandream MA, Barrell B:  
Artemis: sequence visualization and annotation. *Bioinformatics* 2000, 16:944-5.

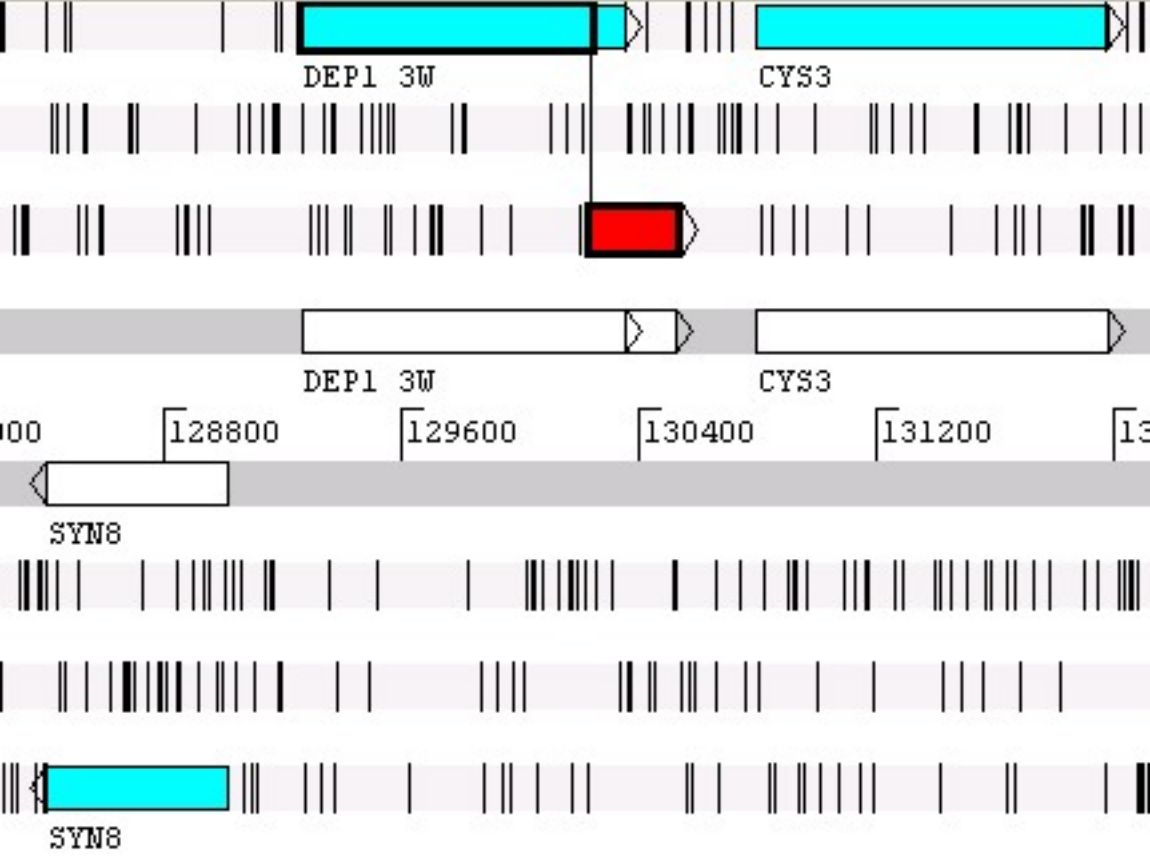



YAT1

OSH1

SWH1 4W

YAT1

SWH1 4W

OSH1

190400

191200

192000

192800

193600

194400

195200

196000

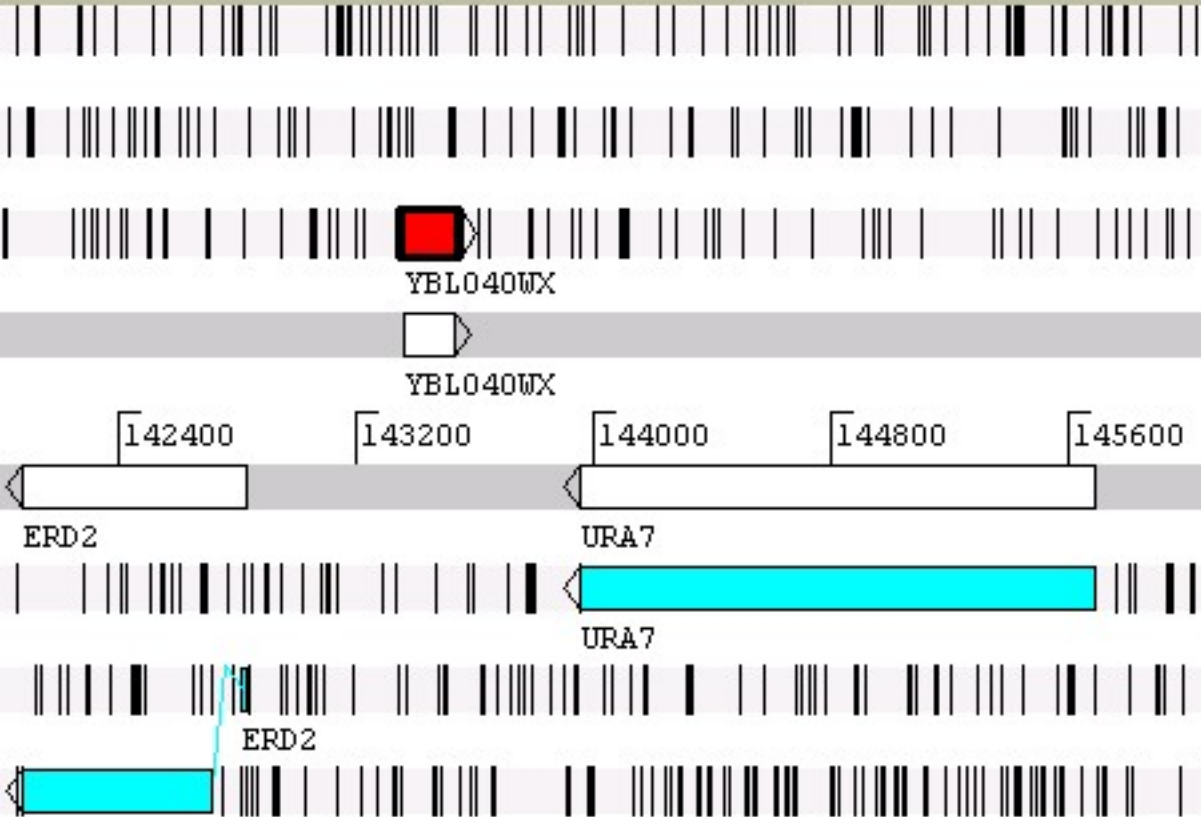

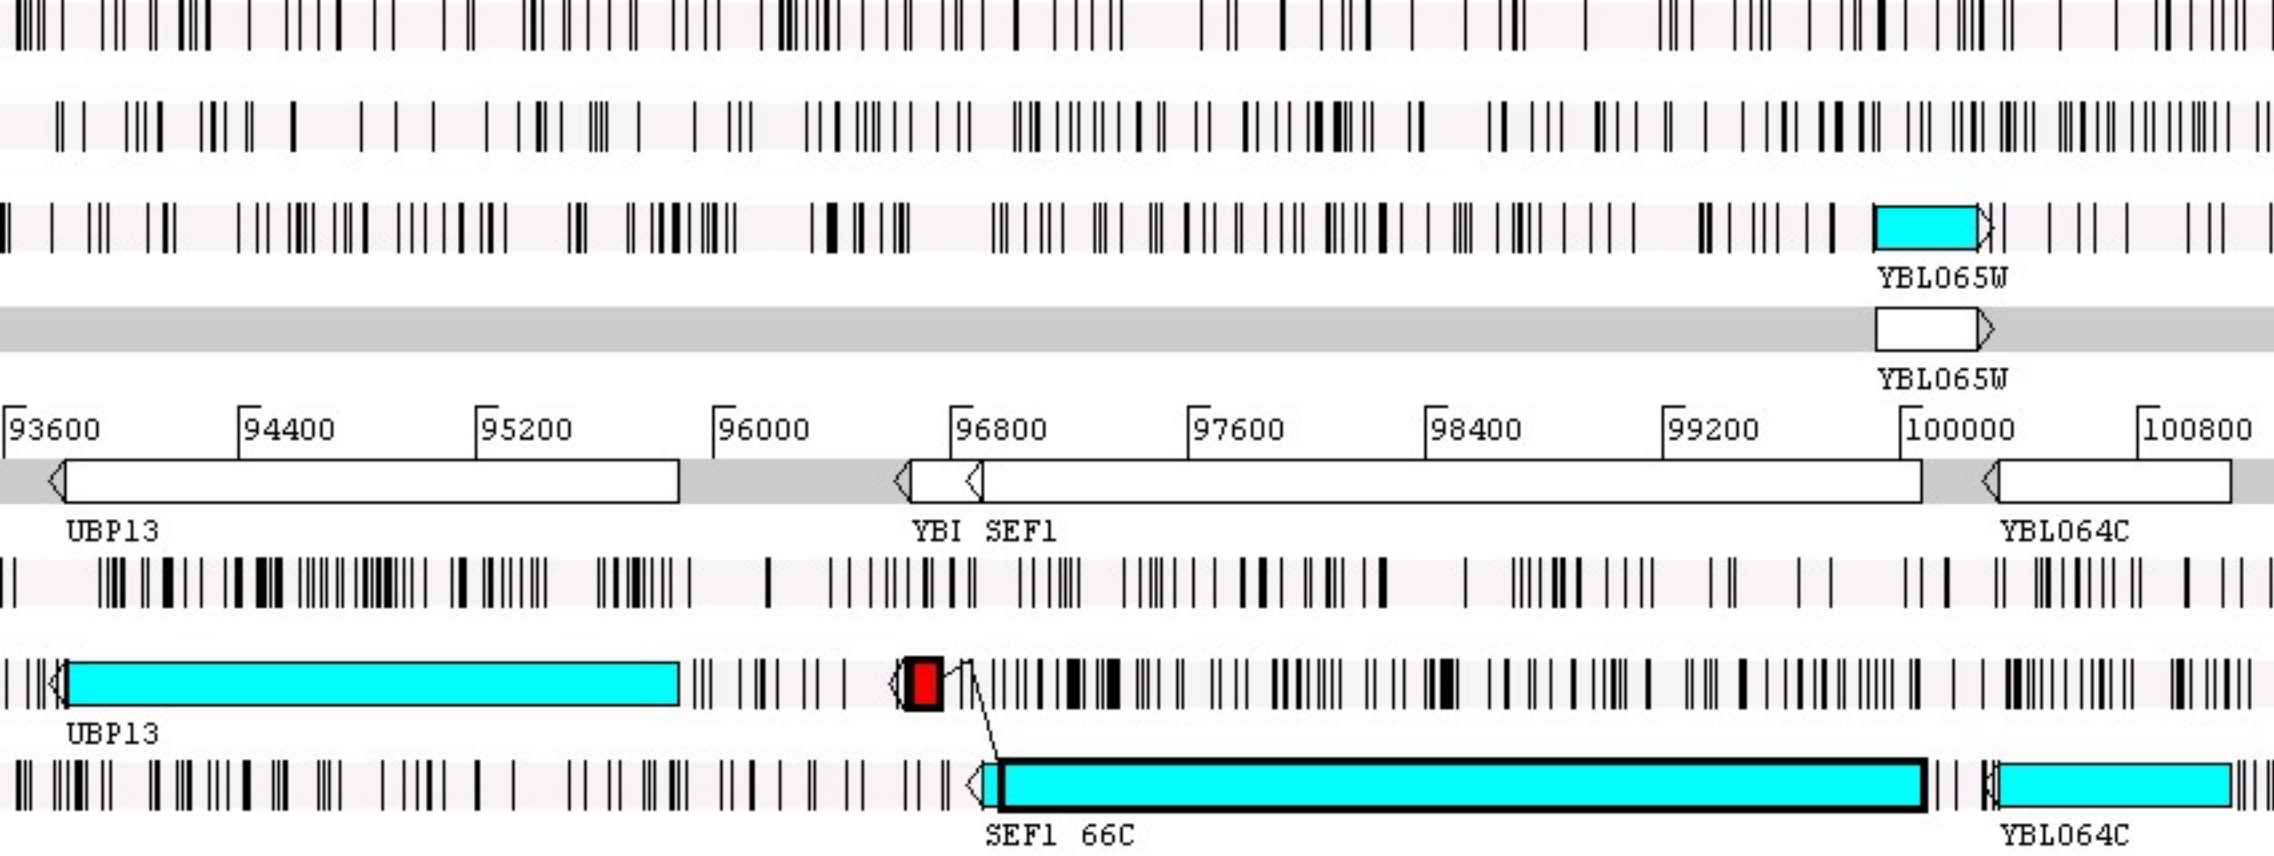

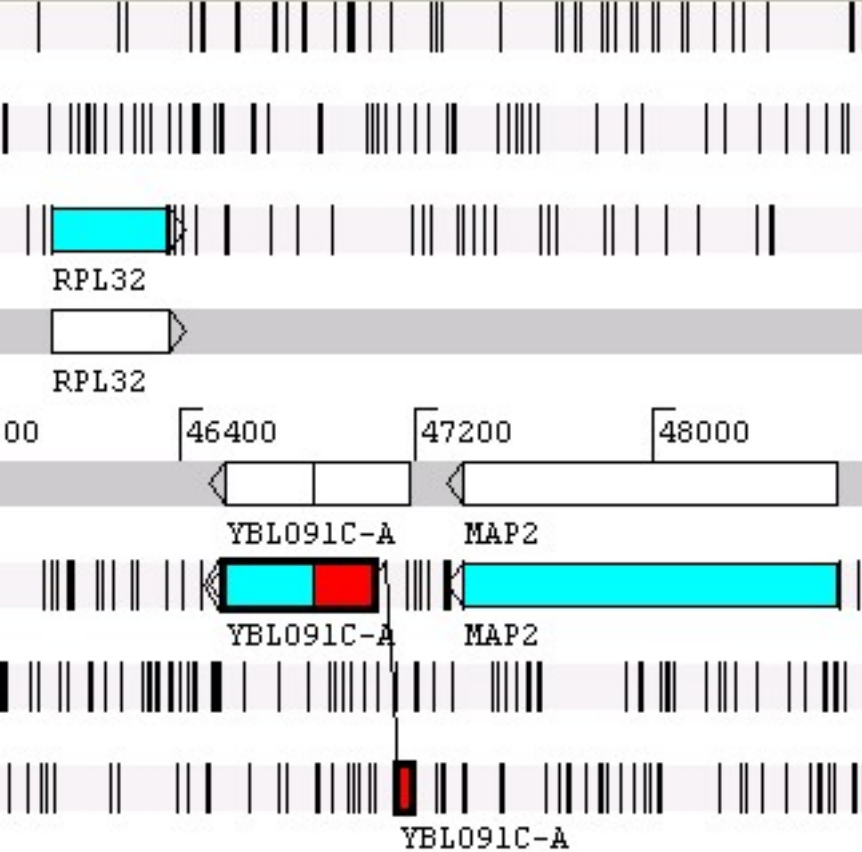

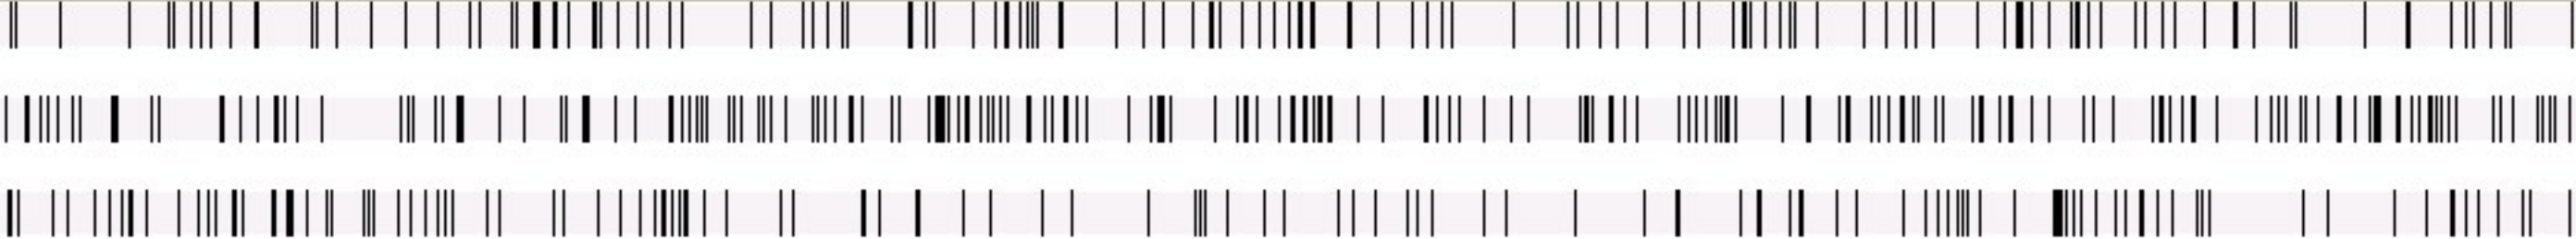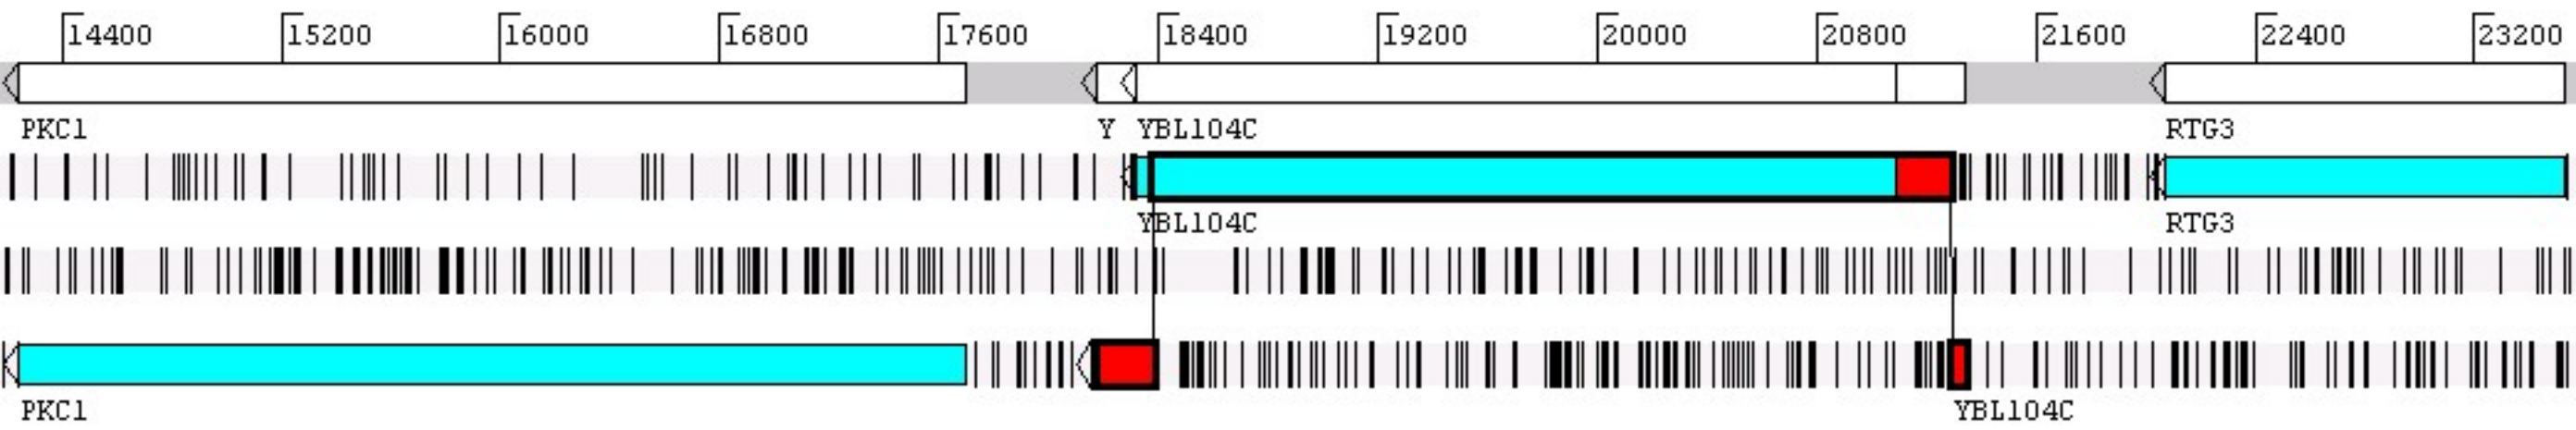

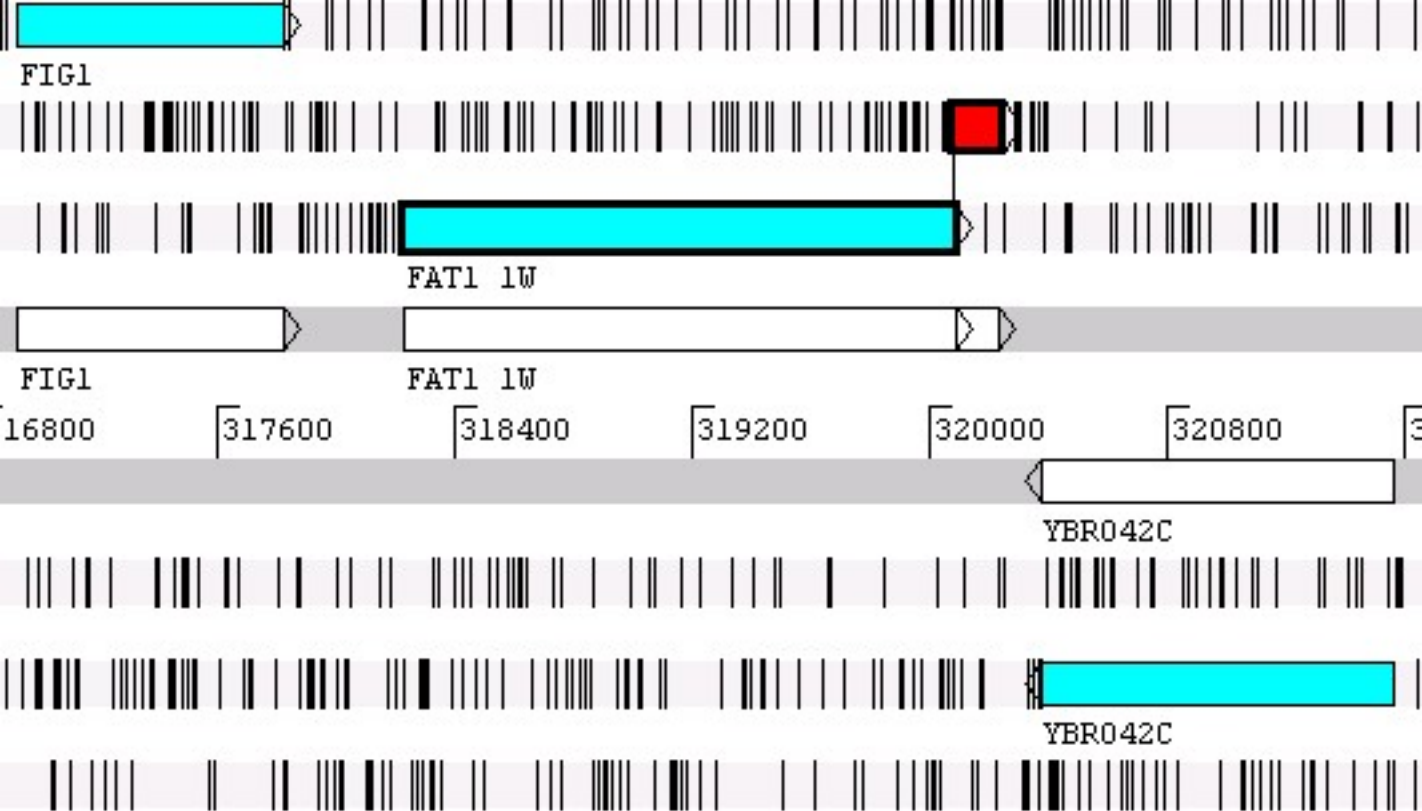



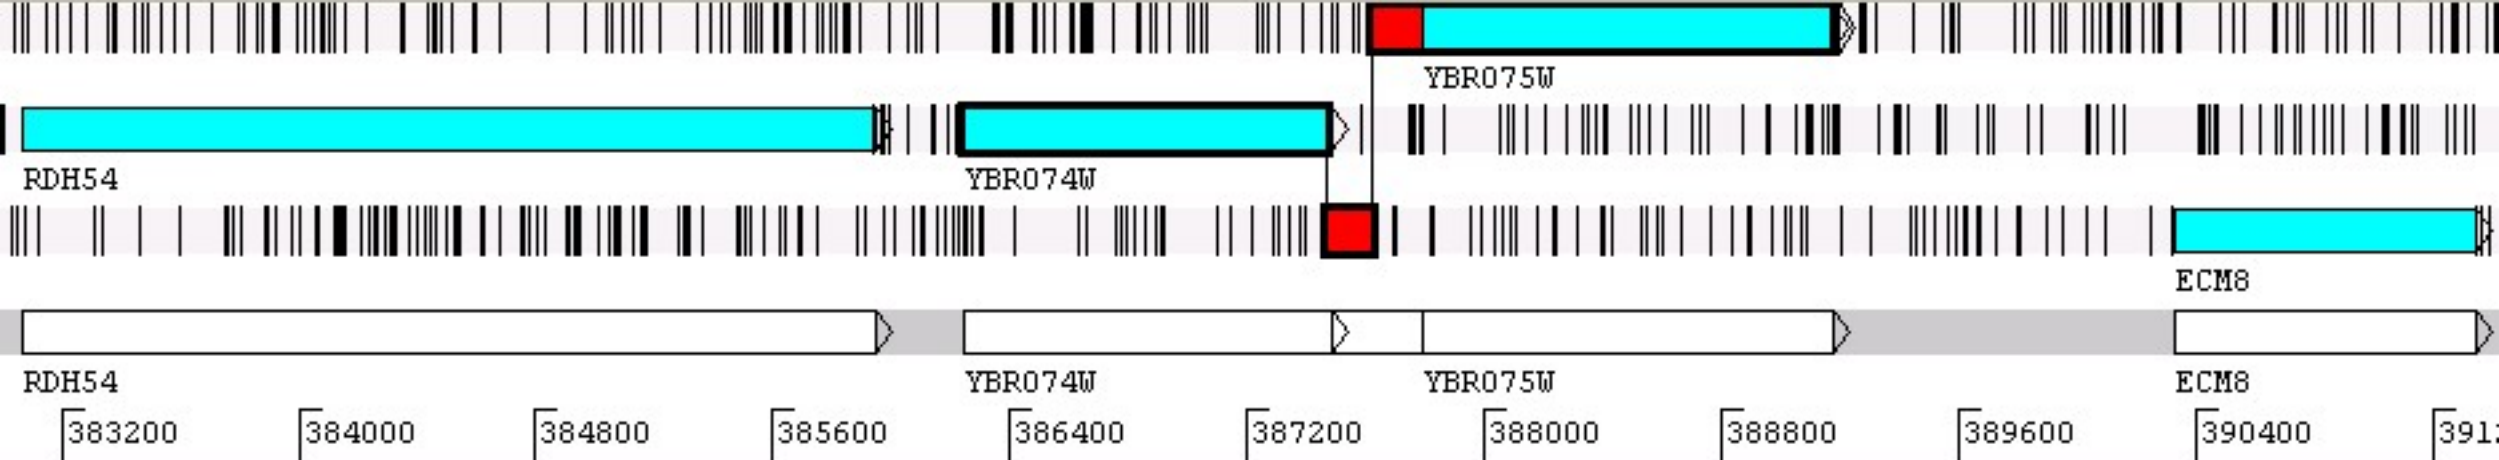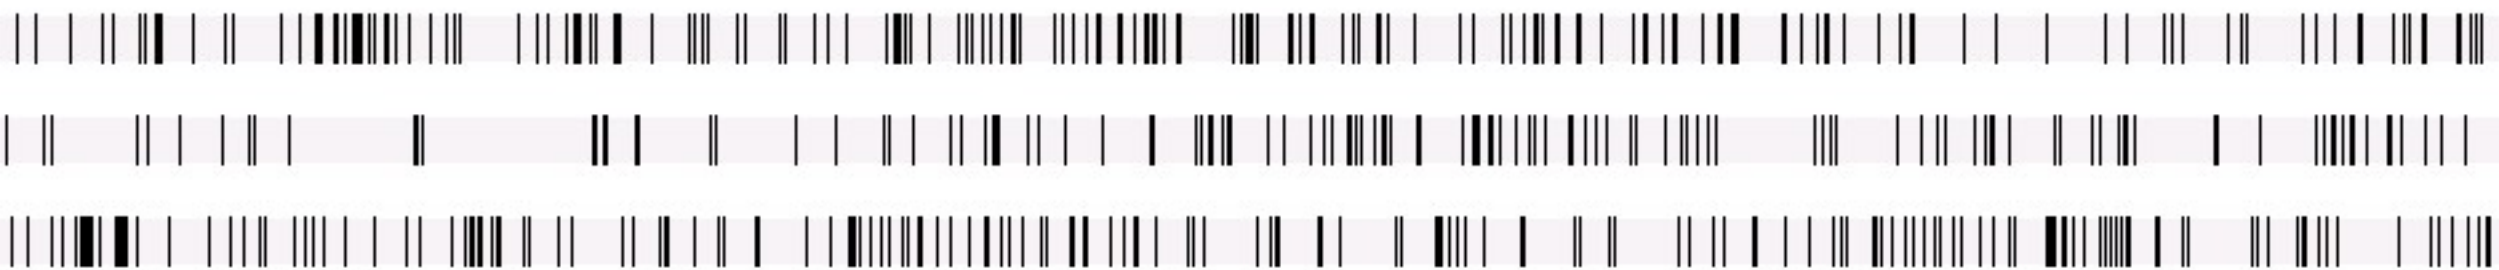

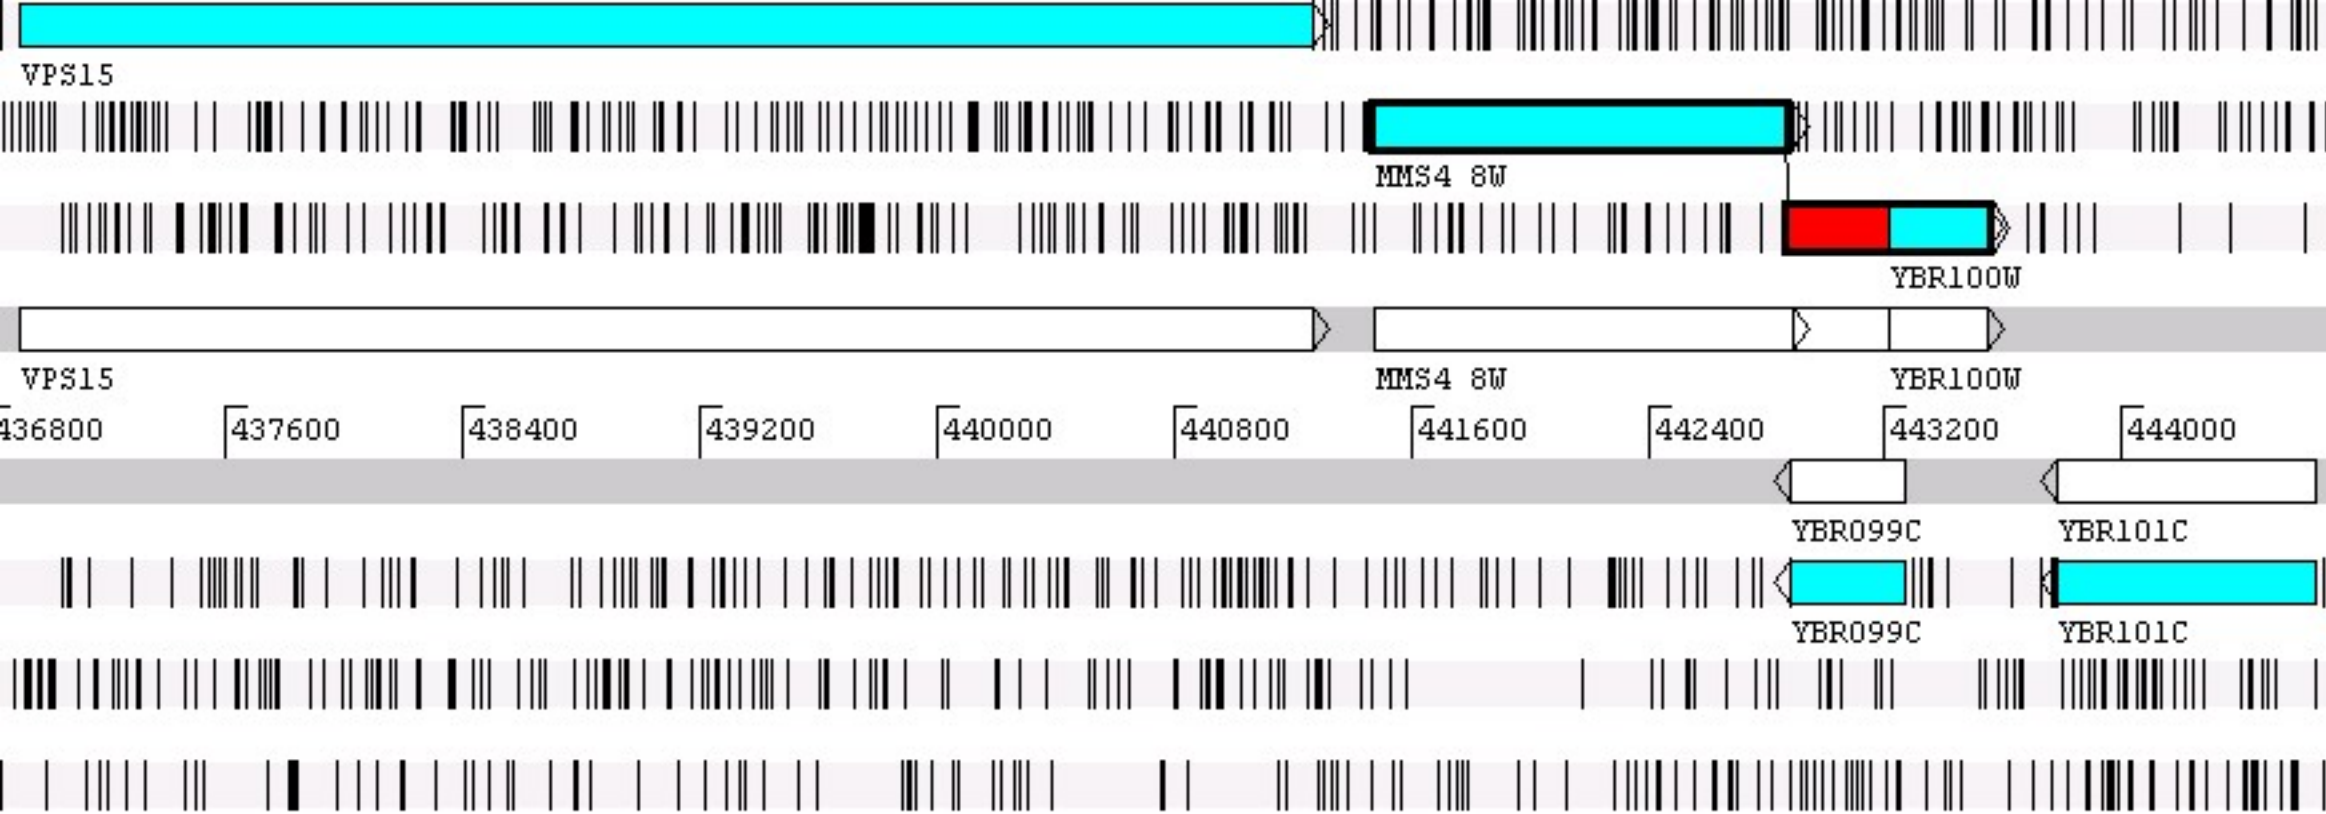

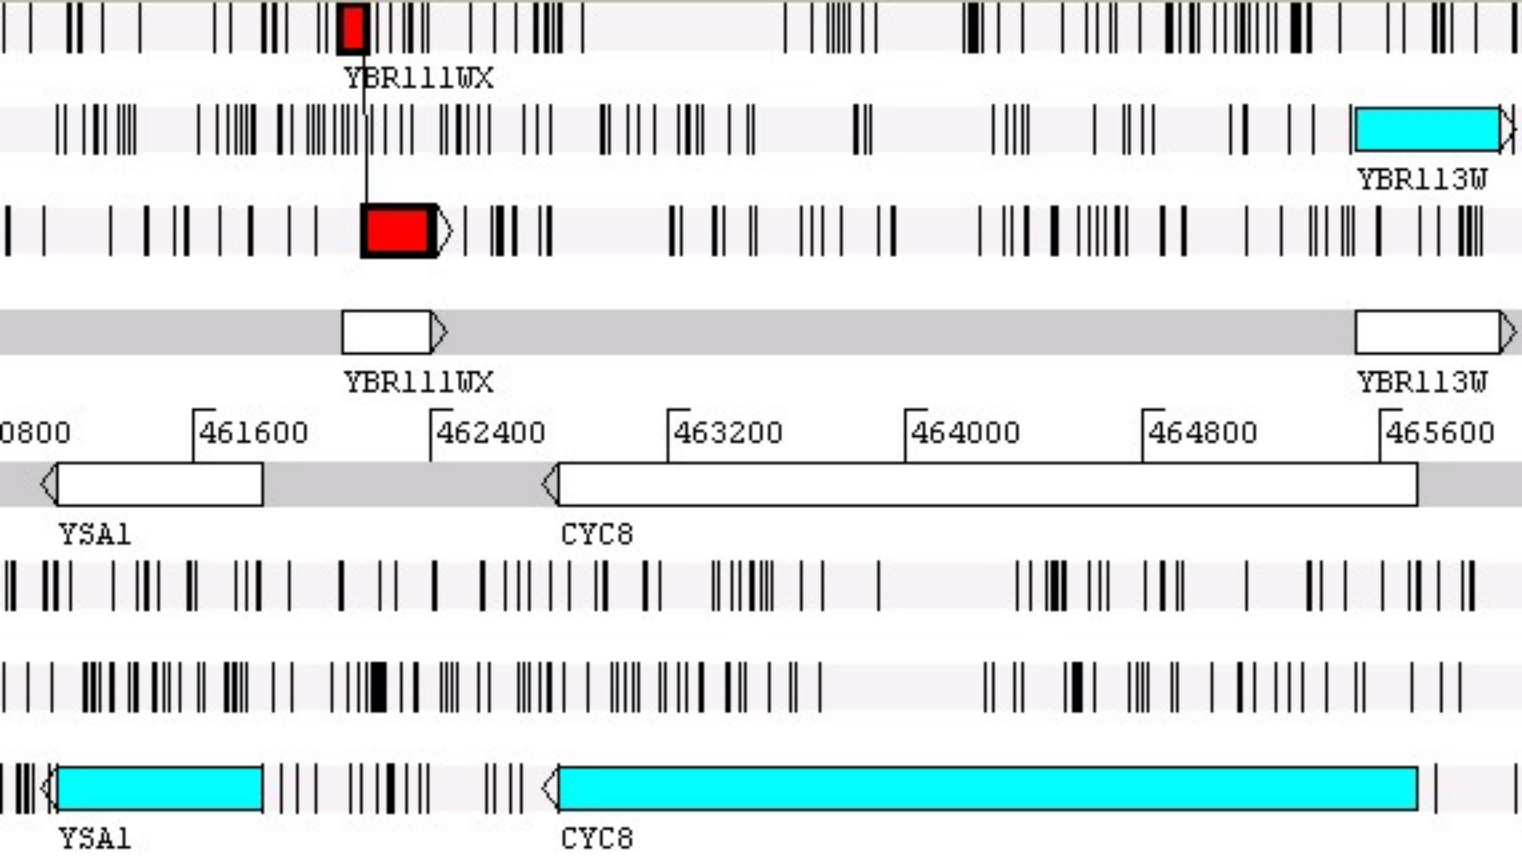

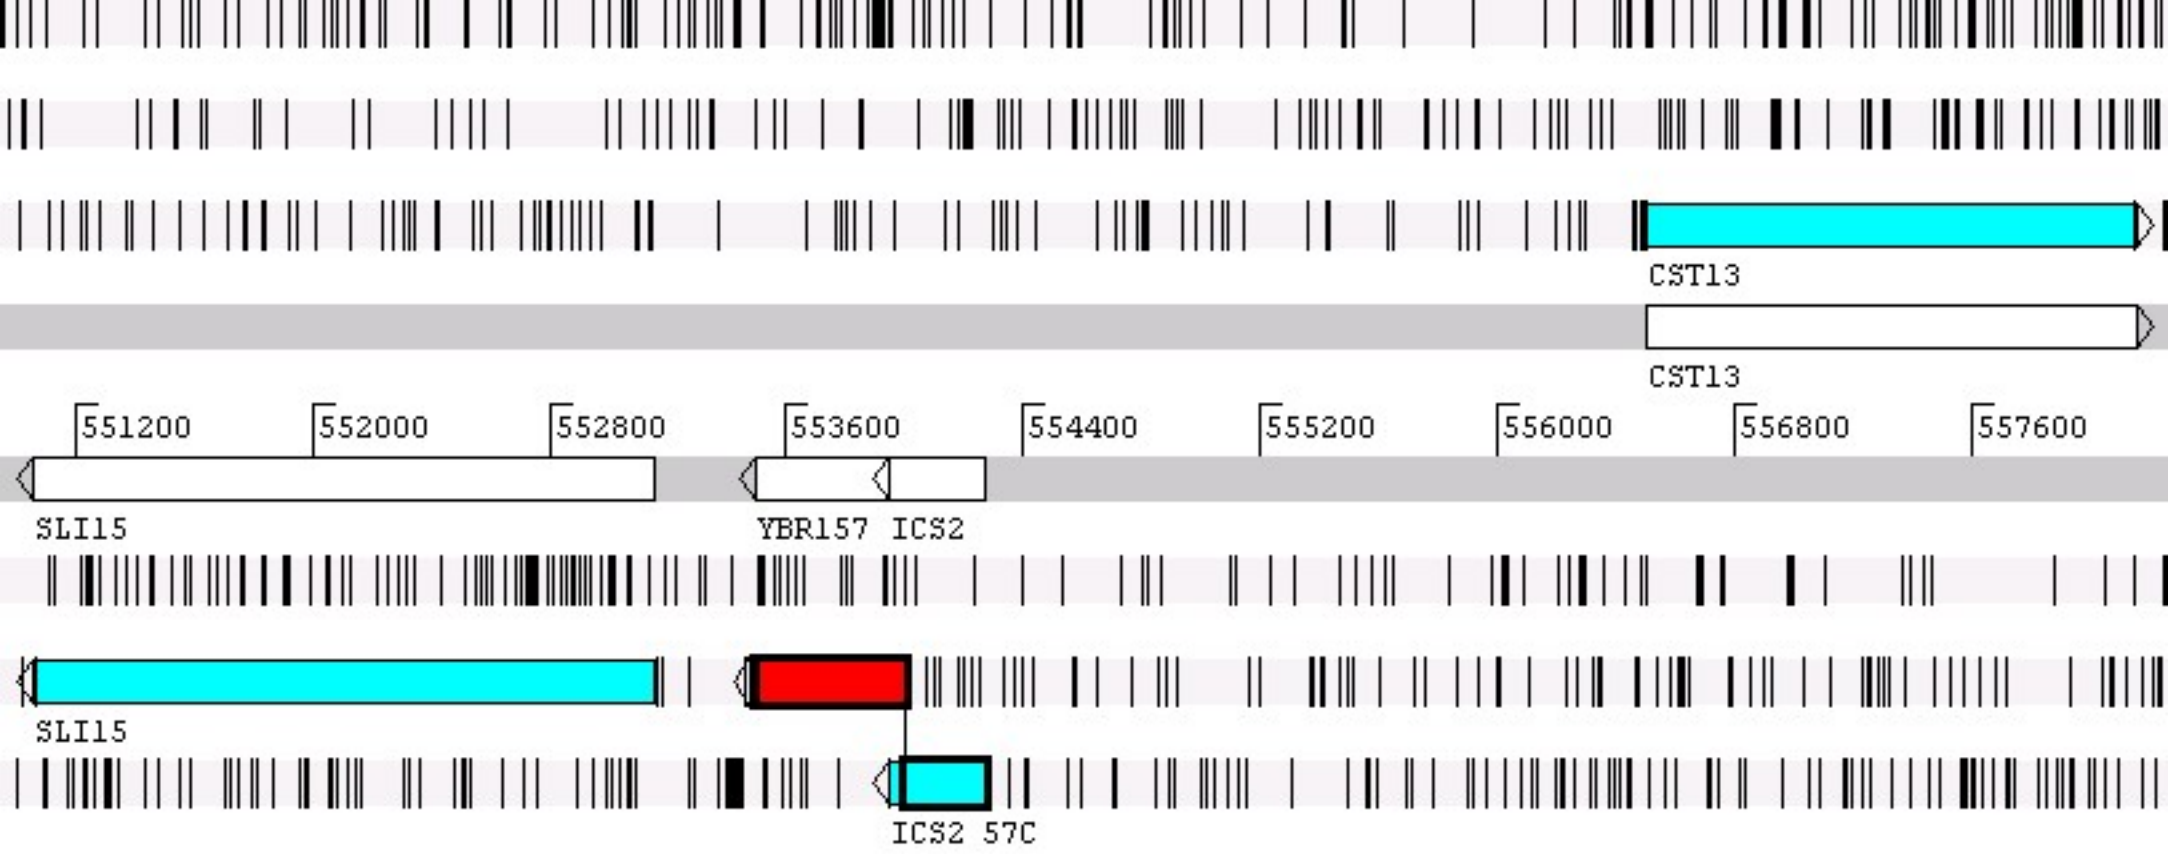

RER1

YCLO01W-A

YCLO01W-B

YCRO01W

RER1

YCLO01W-A

YCLO01W-E

misc\_feature

YCRO01W

112000

112800

113600

114400

115200

116000

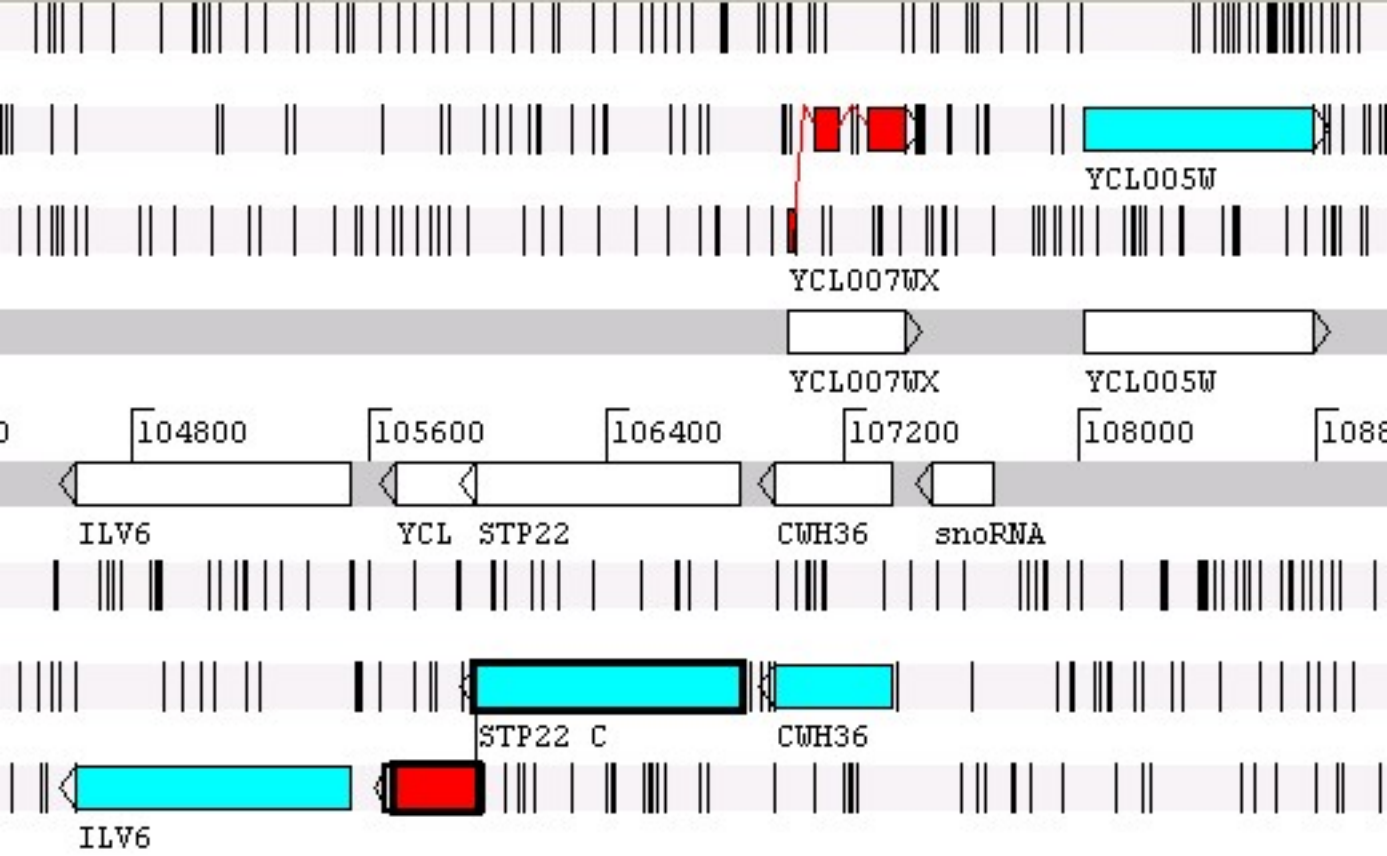



BUD3

BUD3

0 96800

97600

98400

99200

100000

100800

101600

102400

103200



YCL012C



GBP2



YCL012C



GBP2

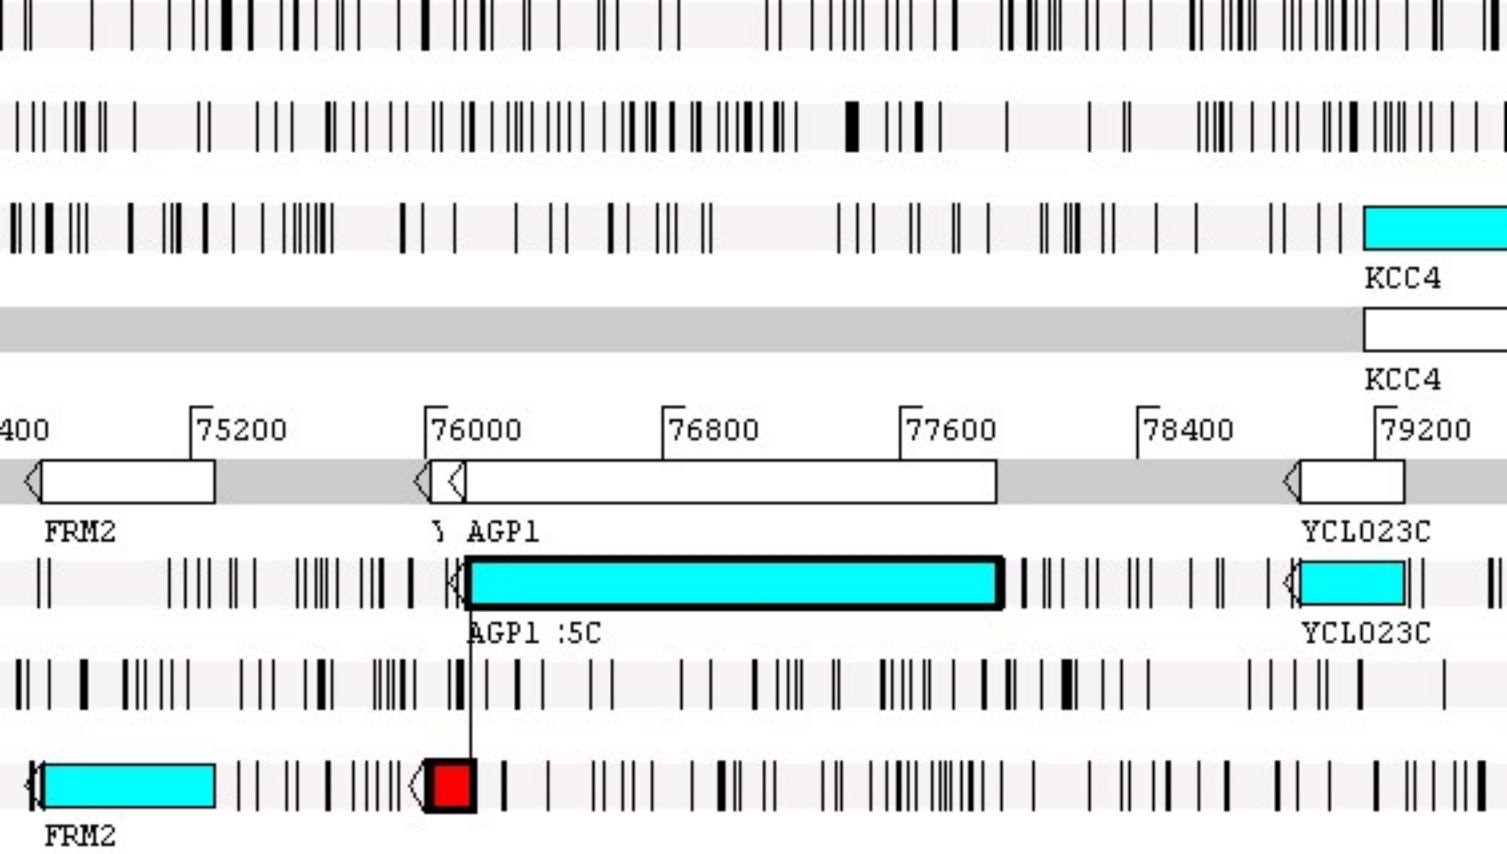



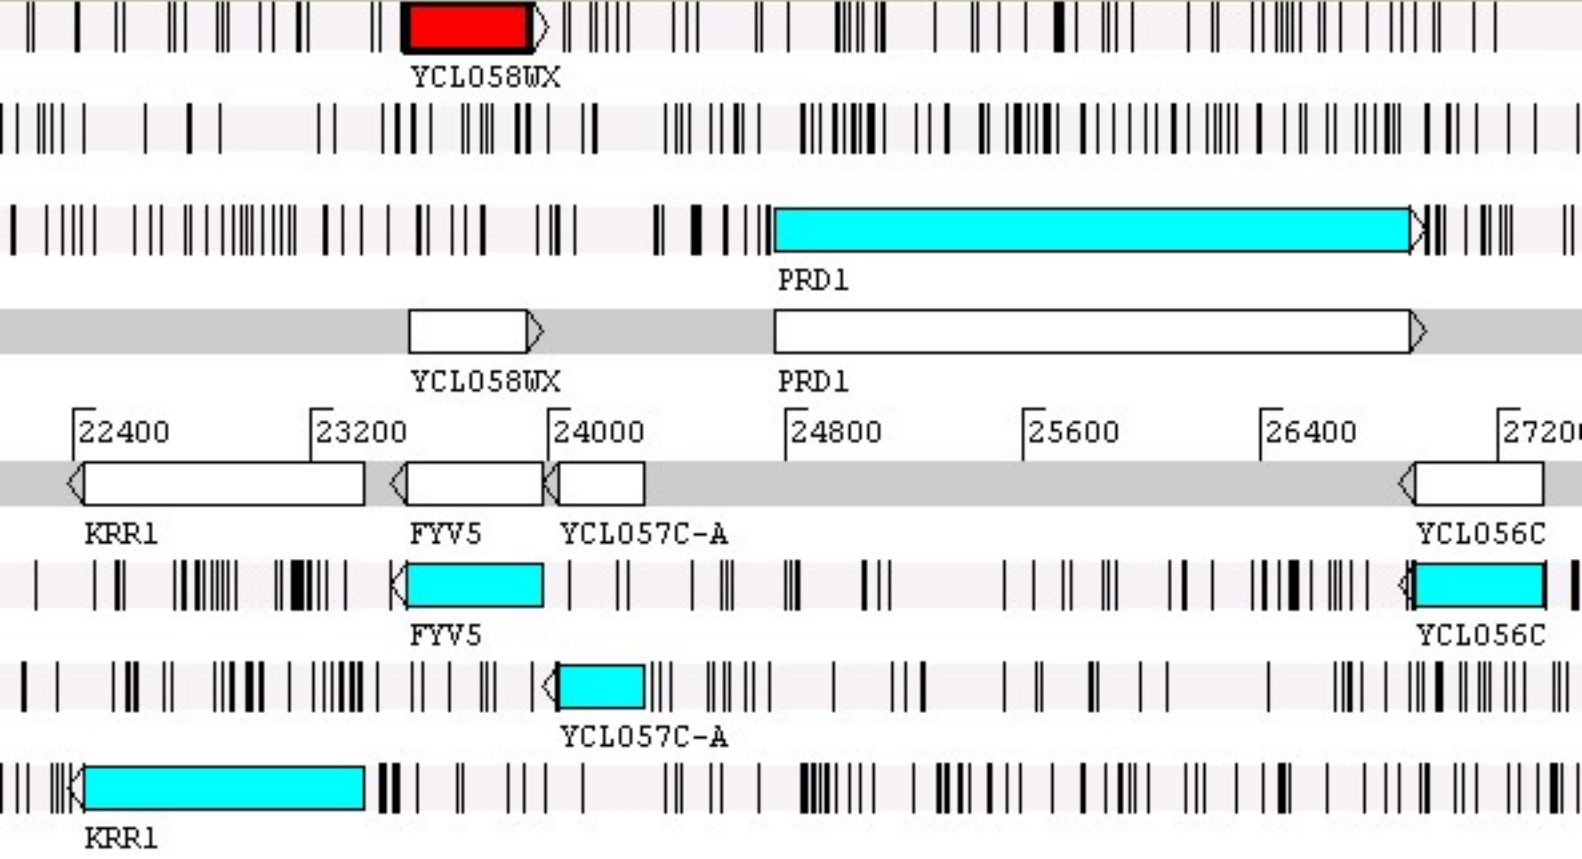

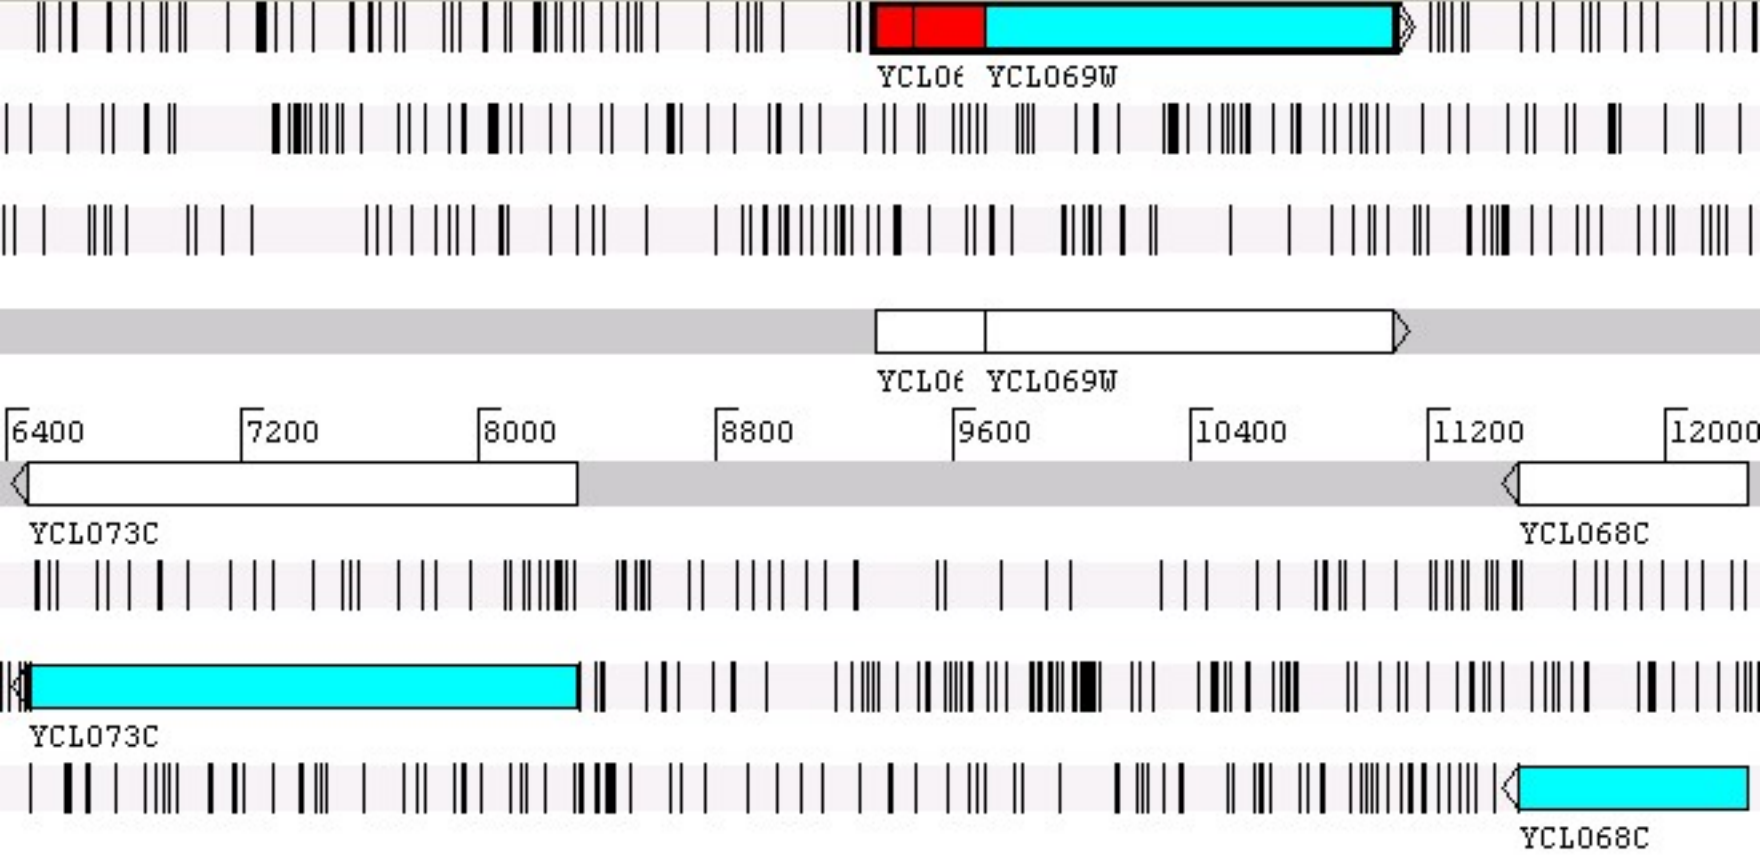

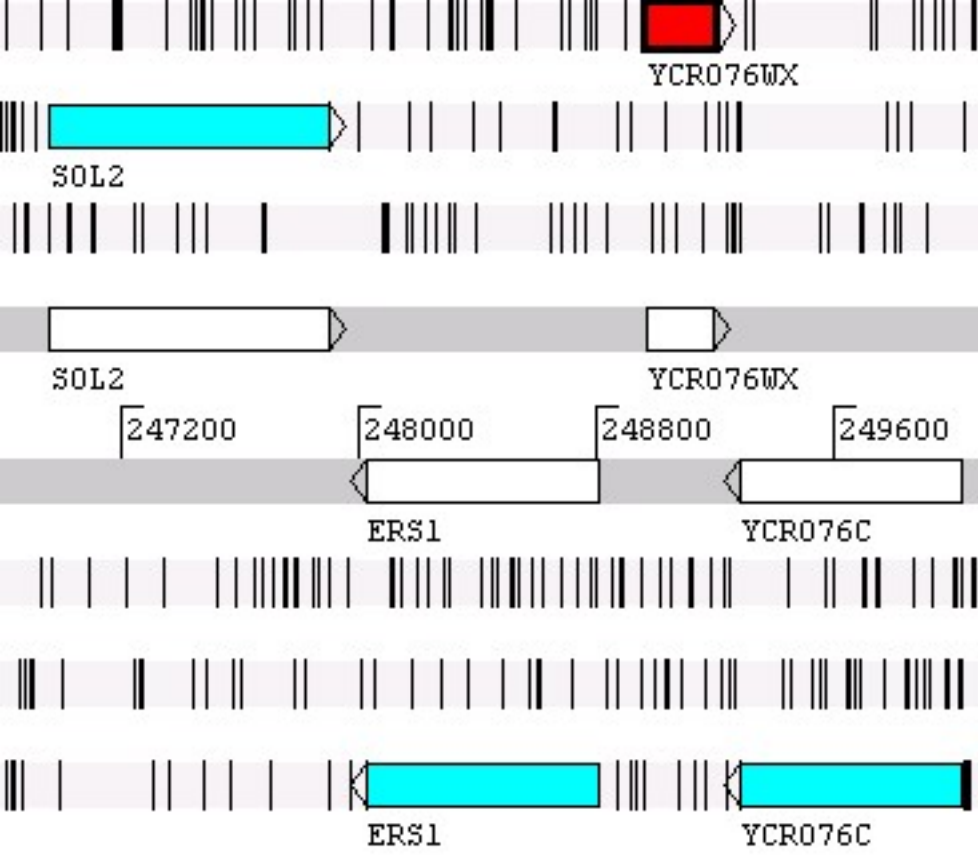

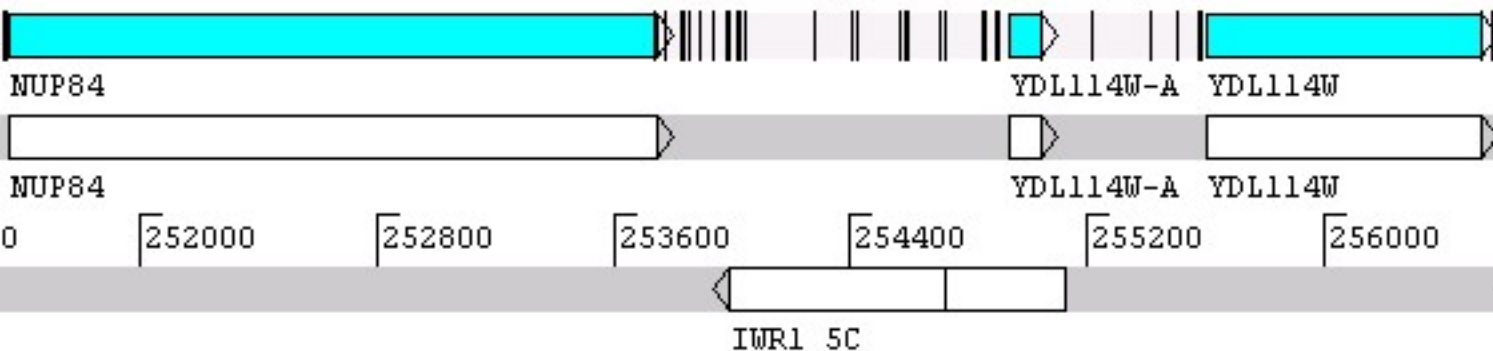

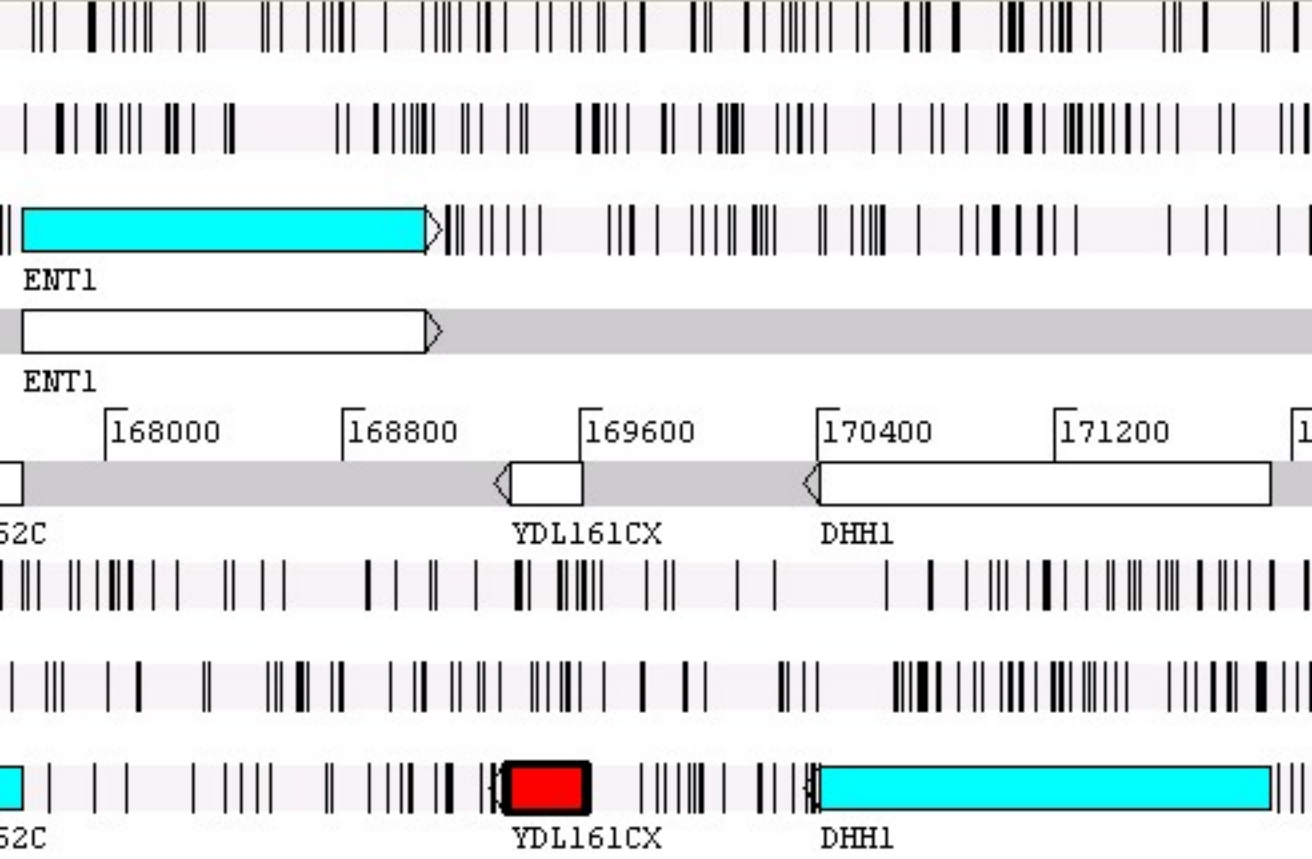

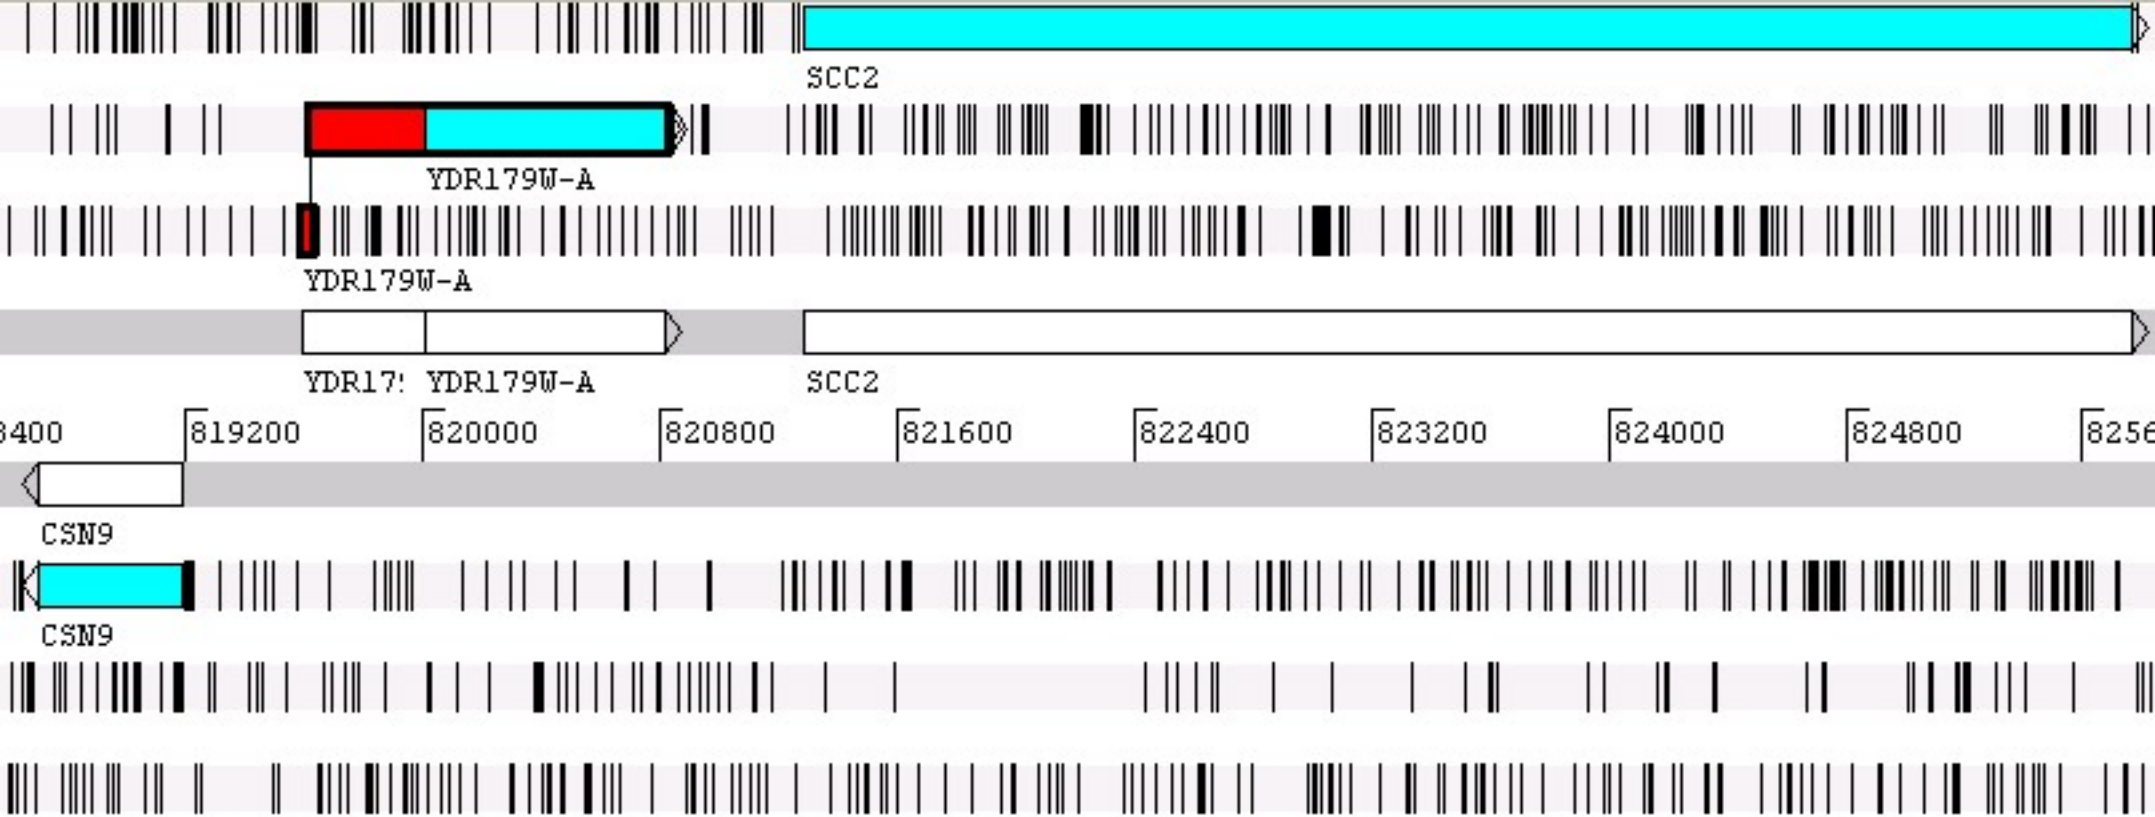

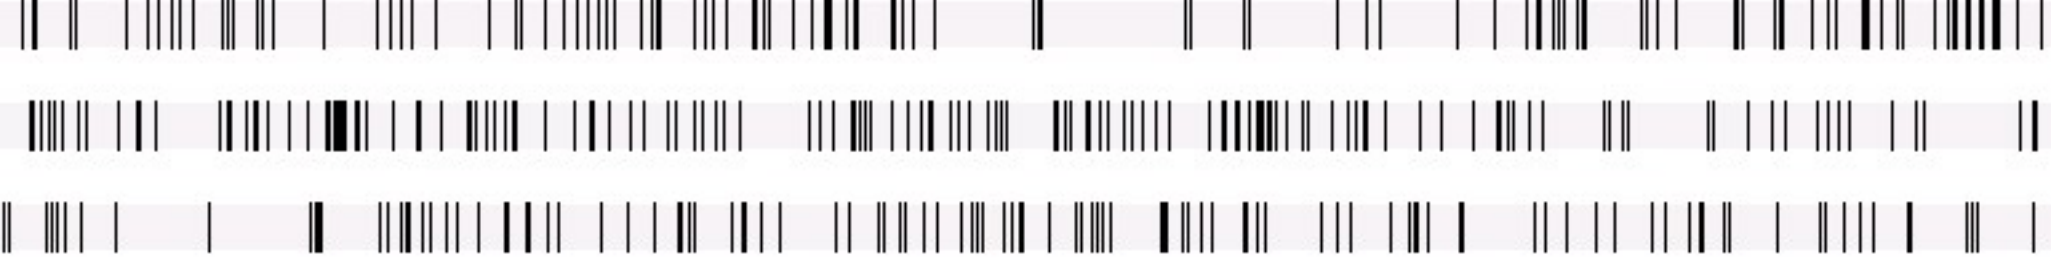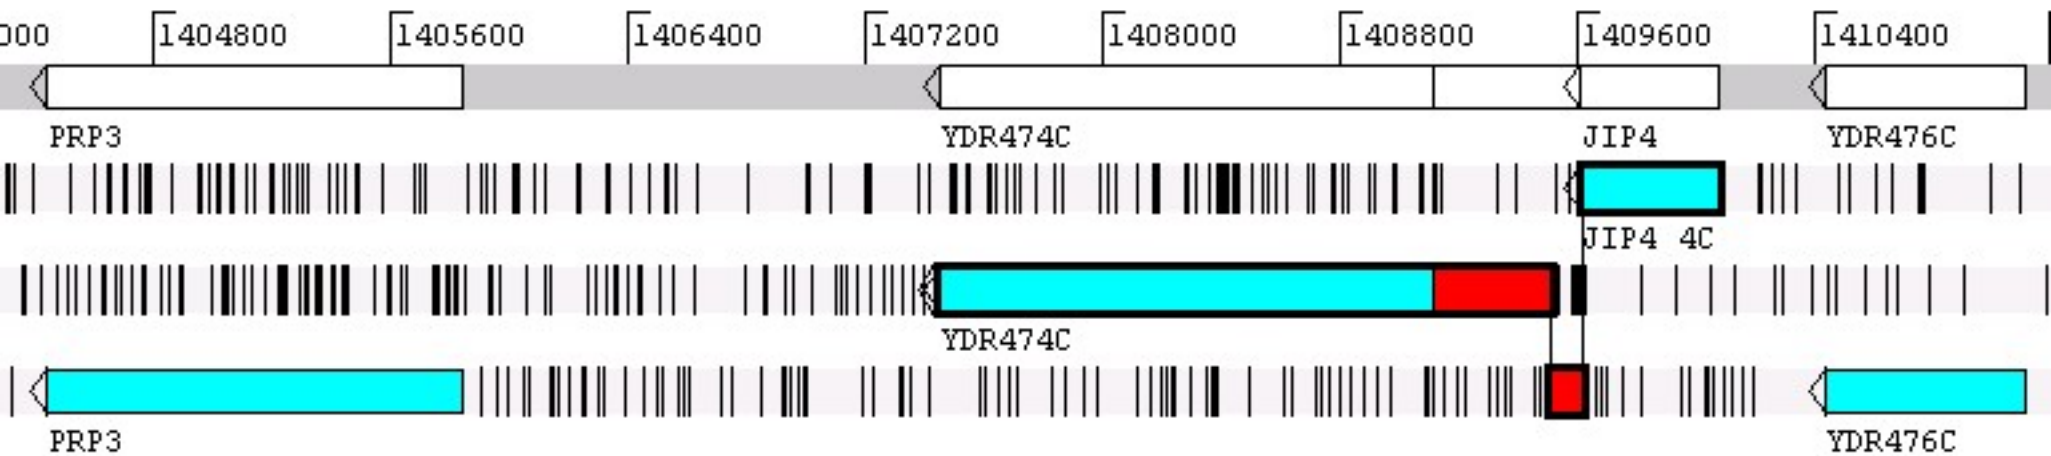

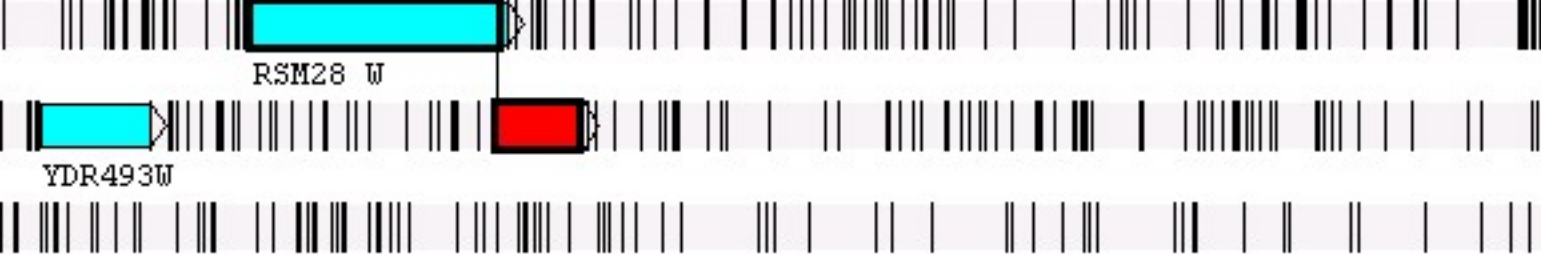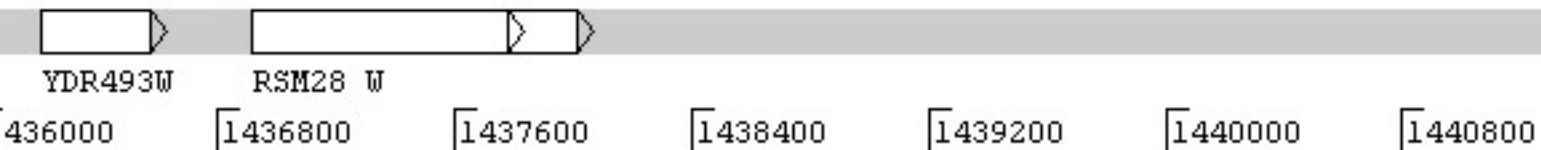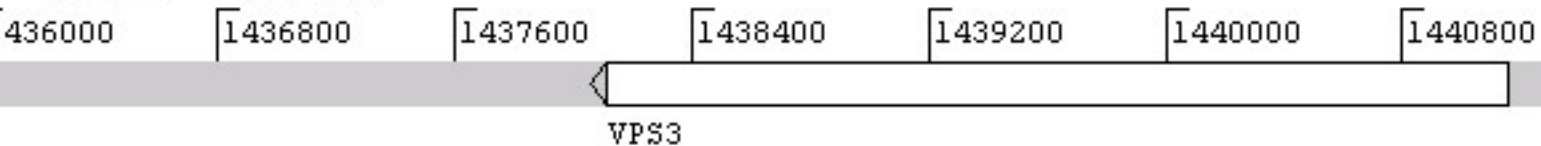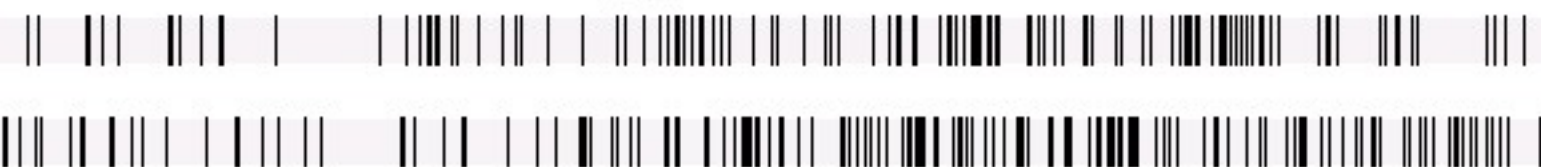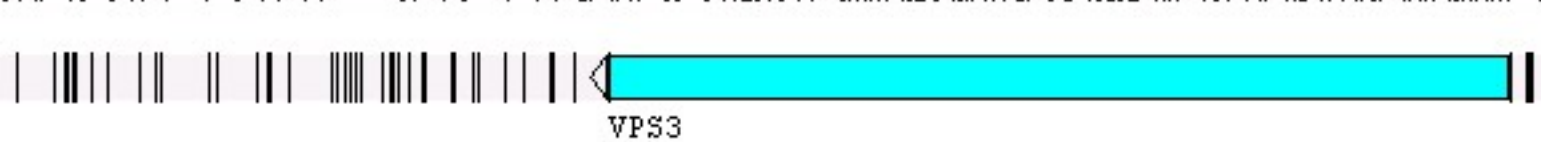



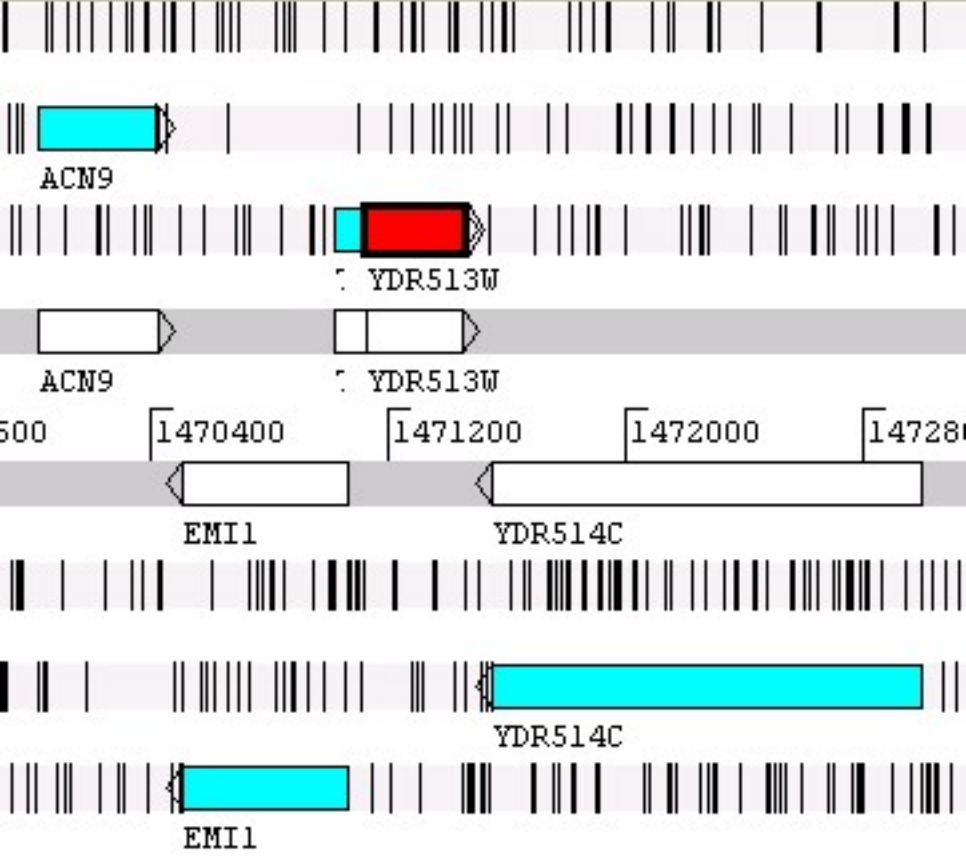

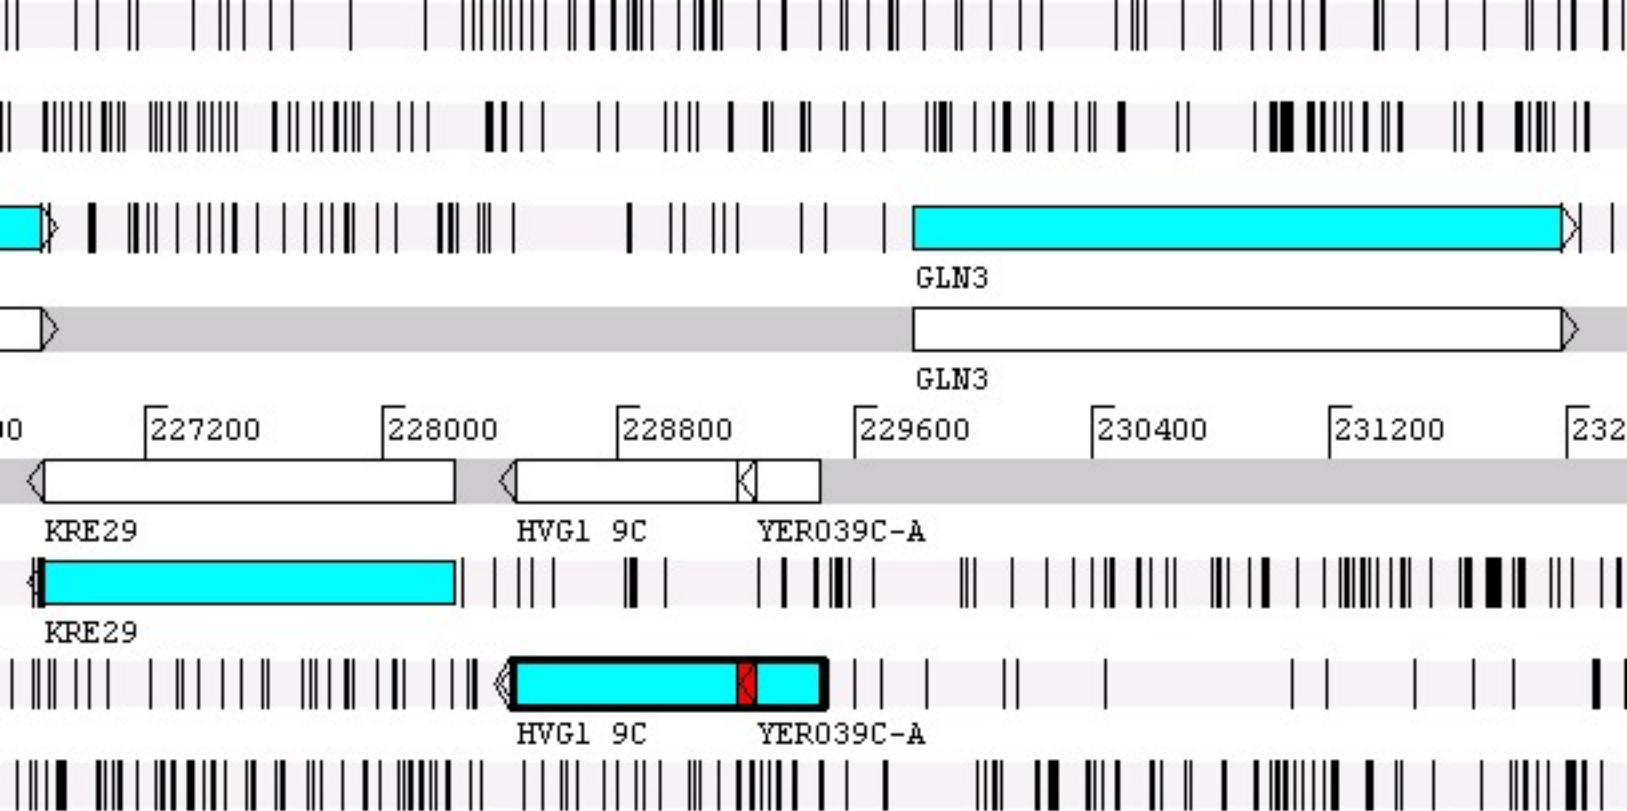

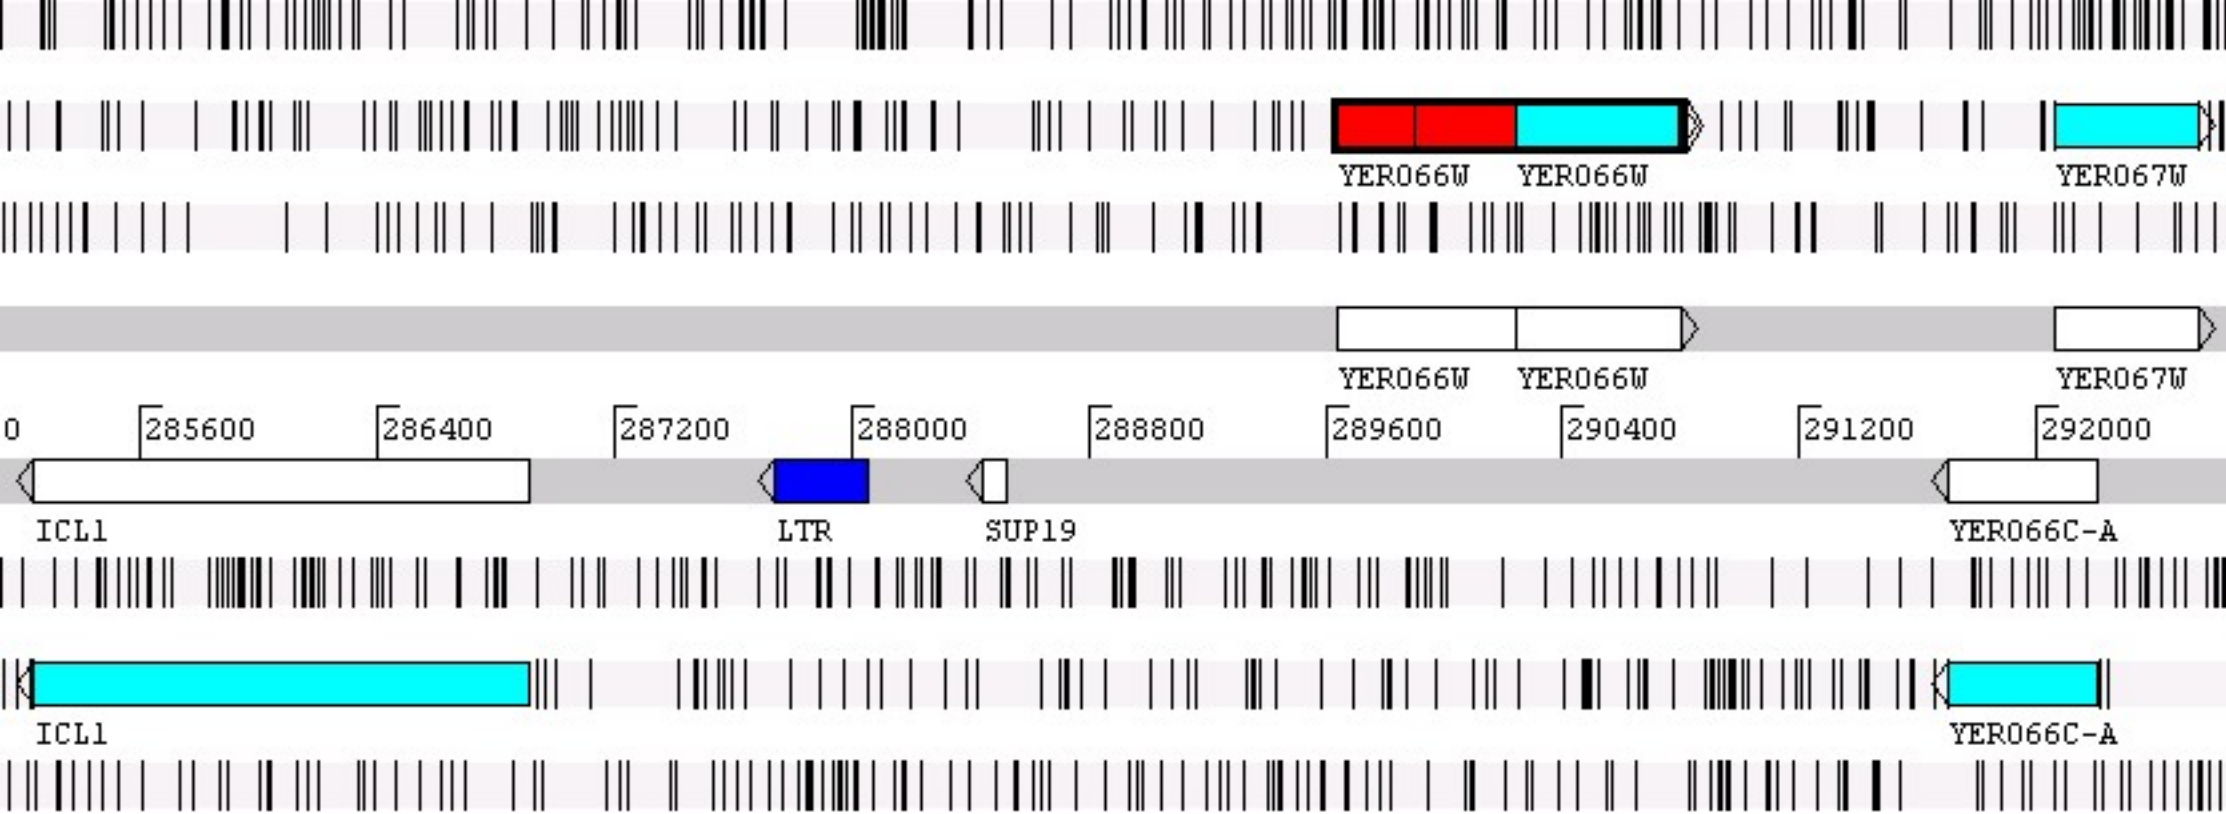

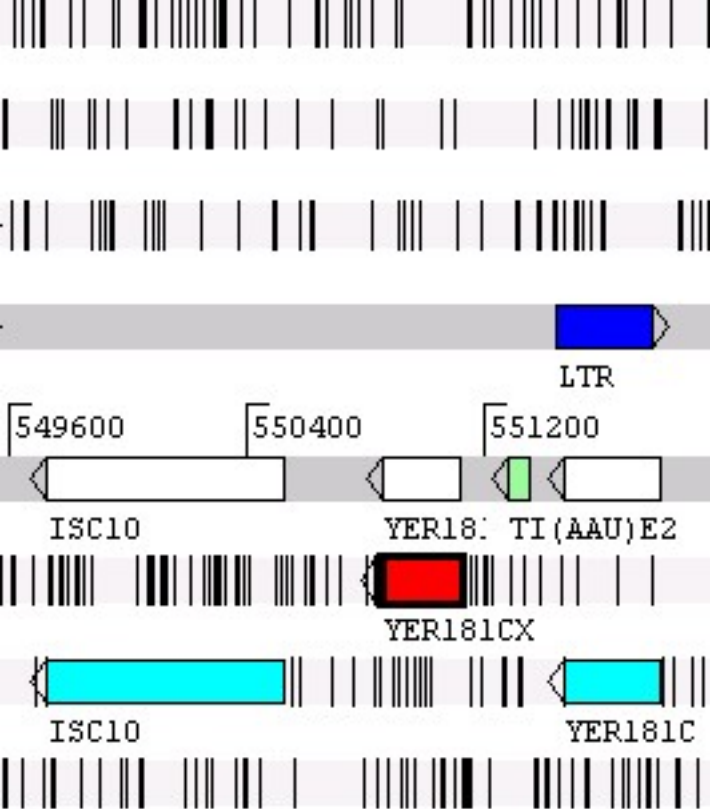

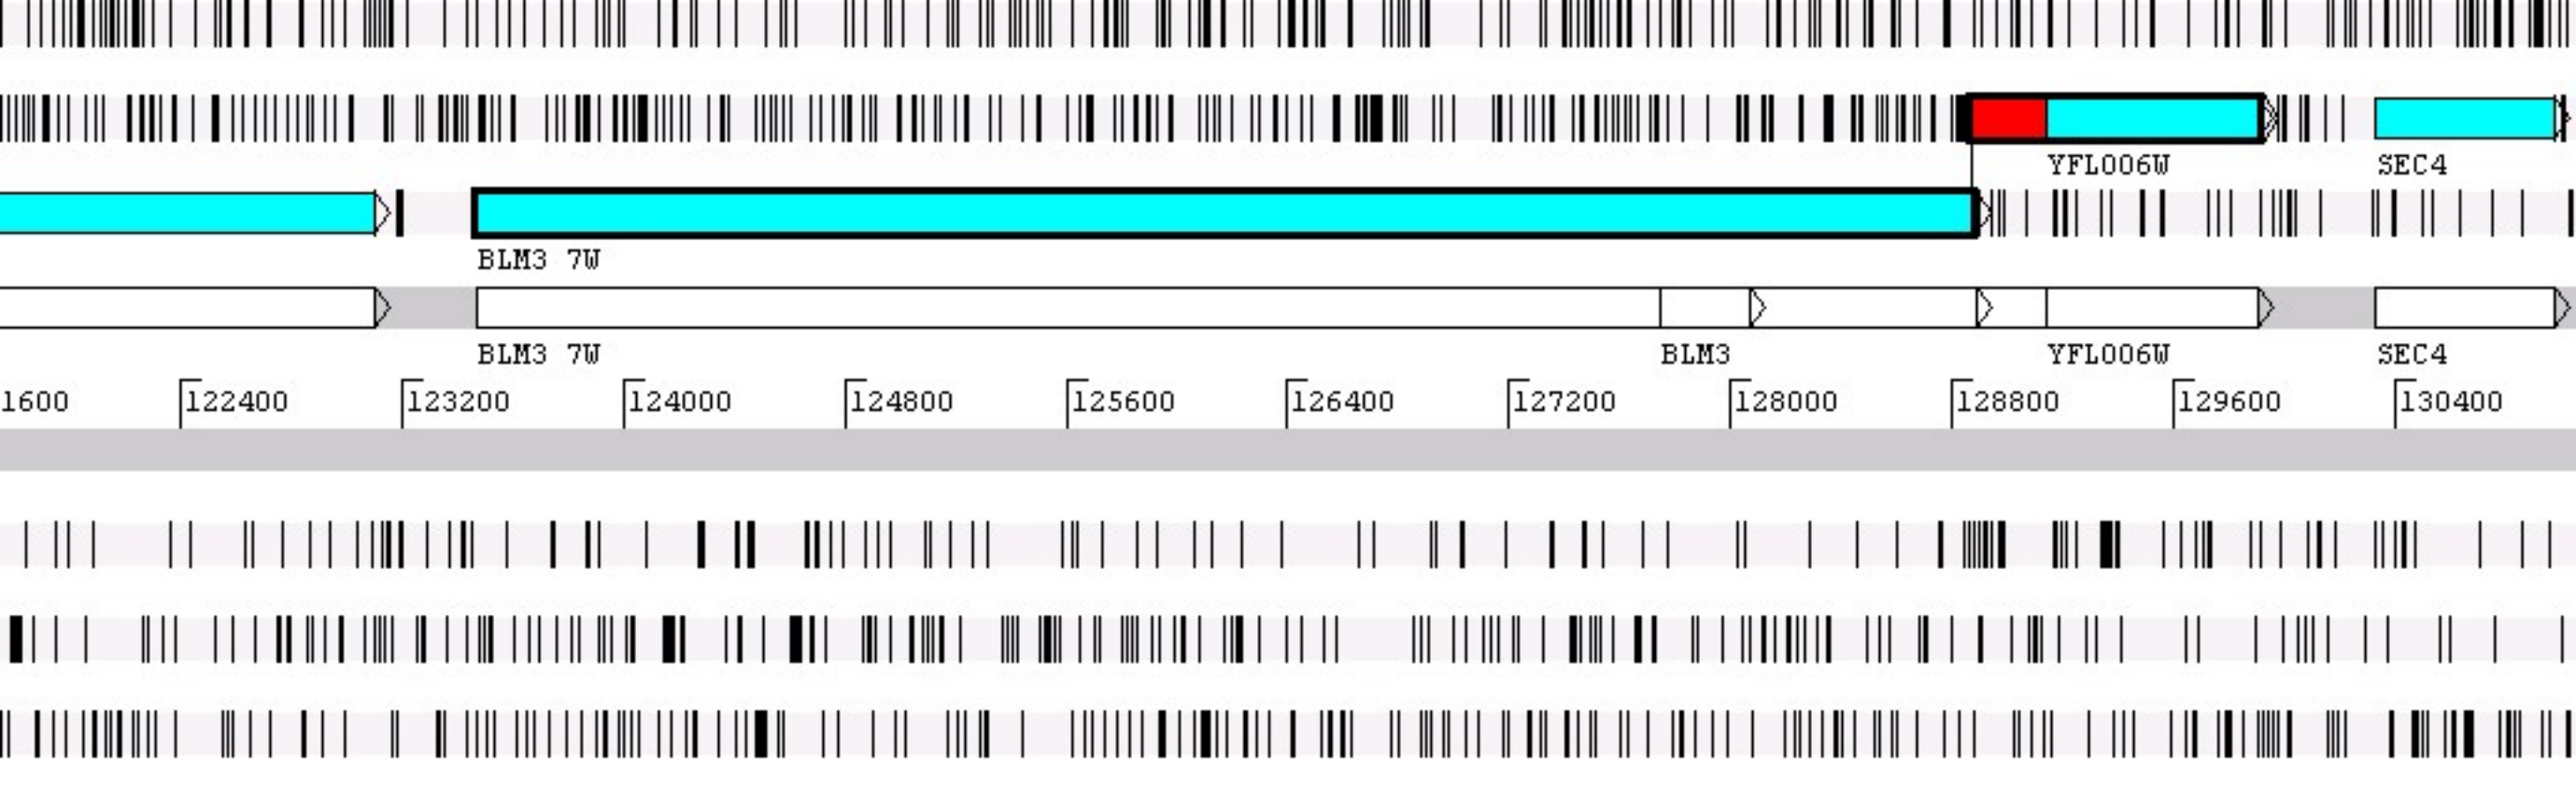

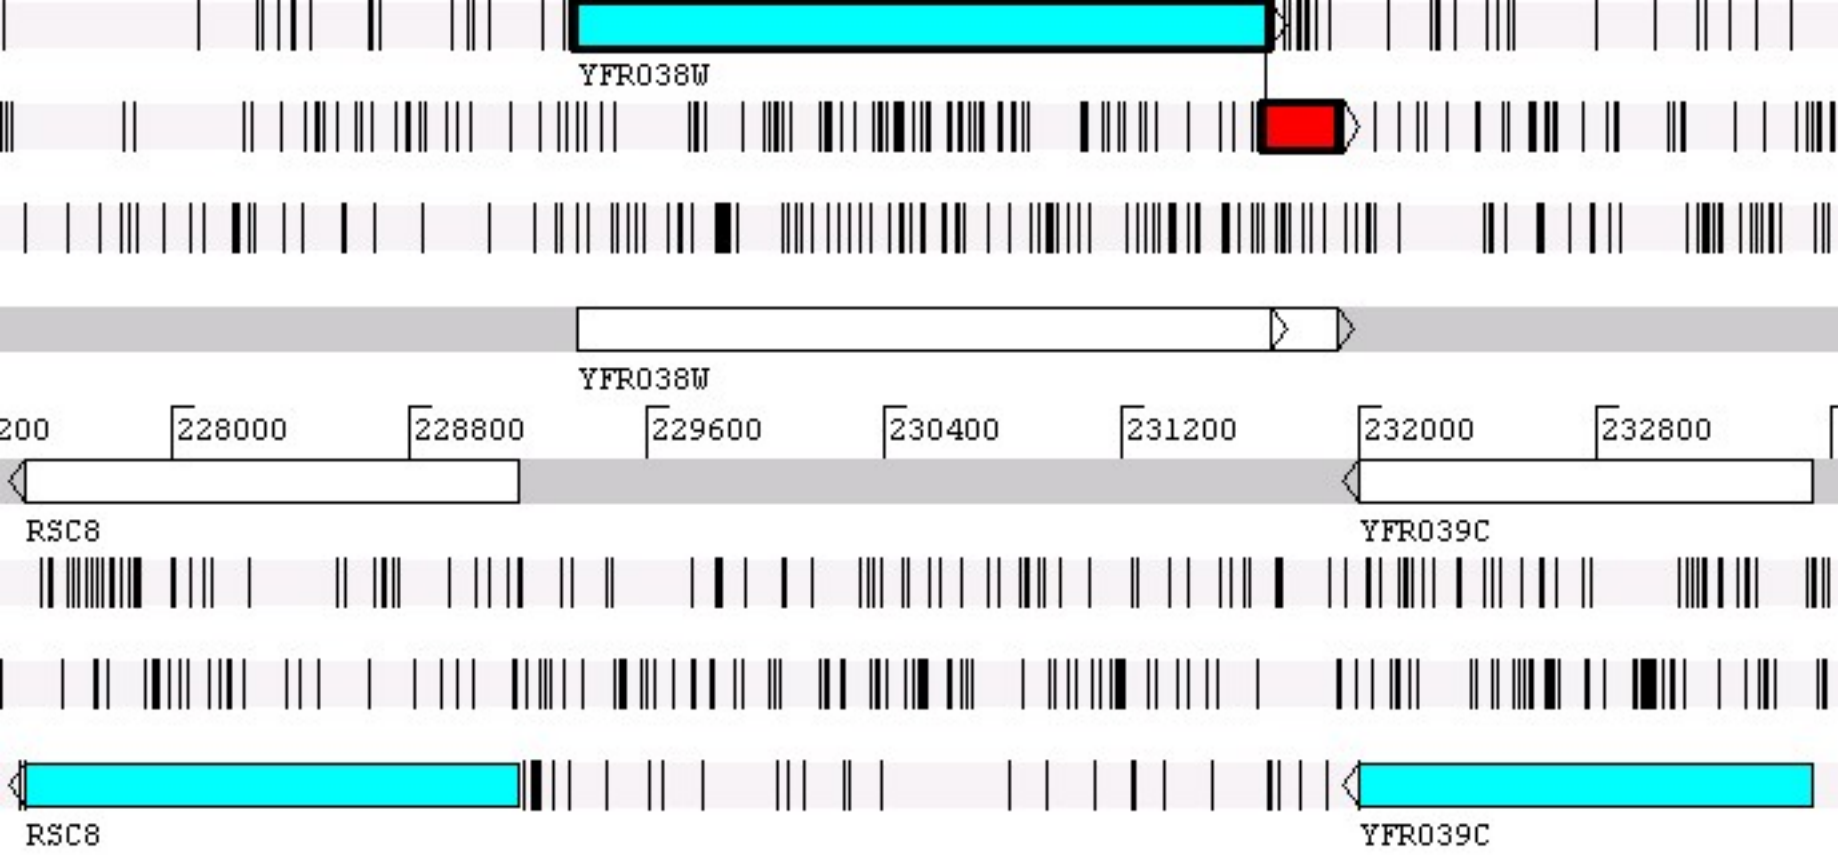

  
YFR040W  
SAP155  
YFR0 SAP155

232000

232800

233600

234400

235200

236000

236800

237600

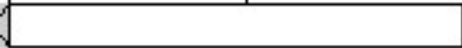  
YFR039C  
YFR041C  
YFR041C  
YFR039C

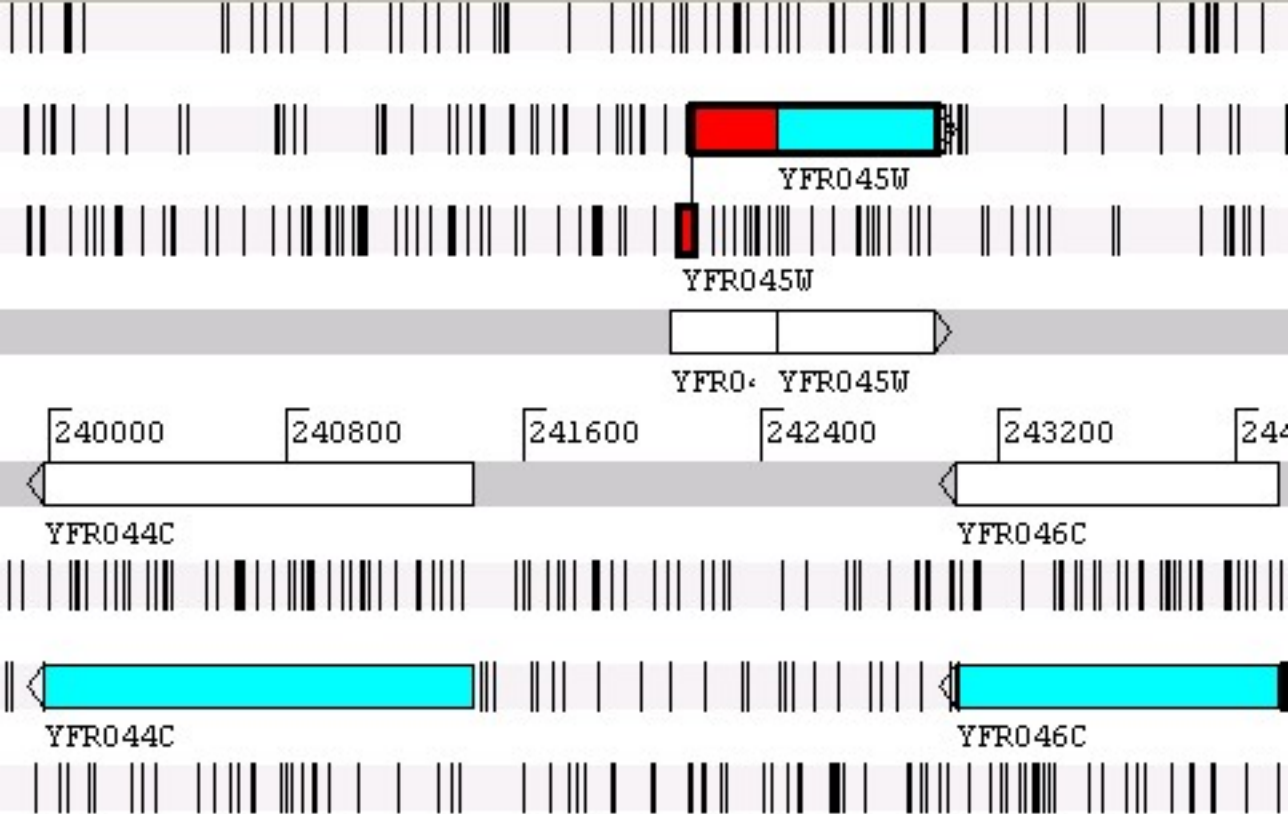



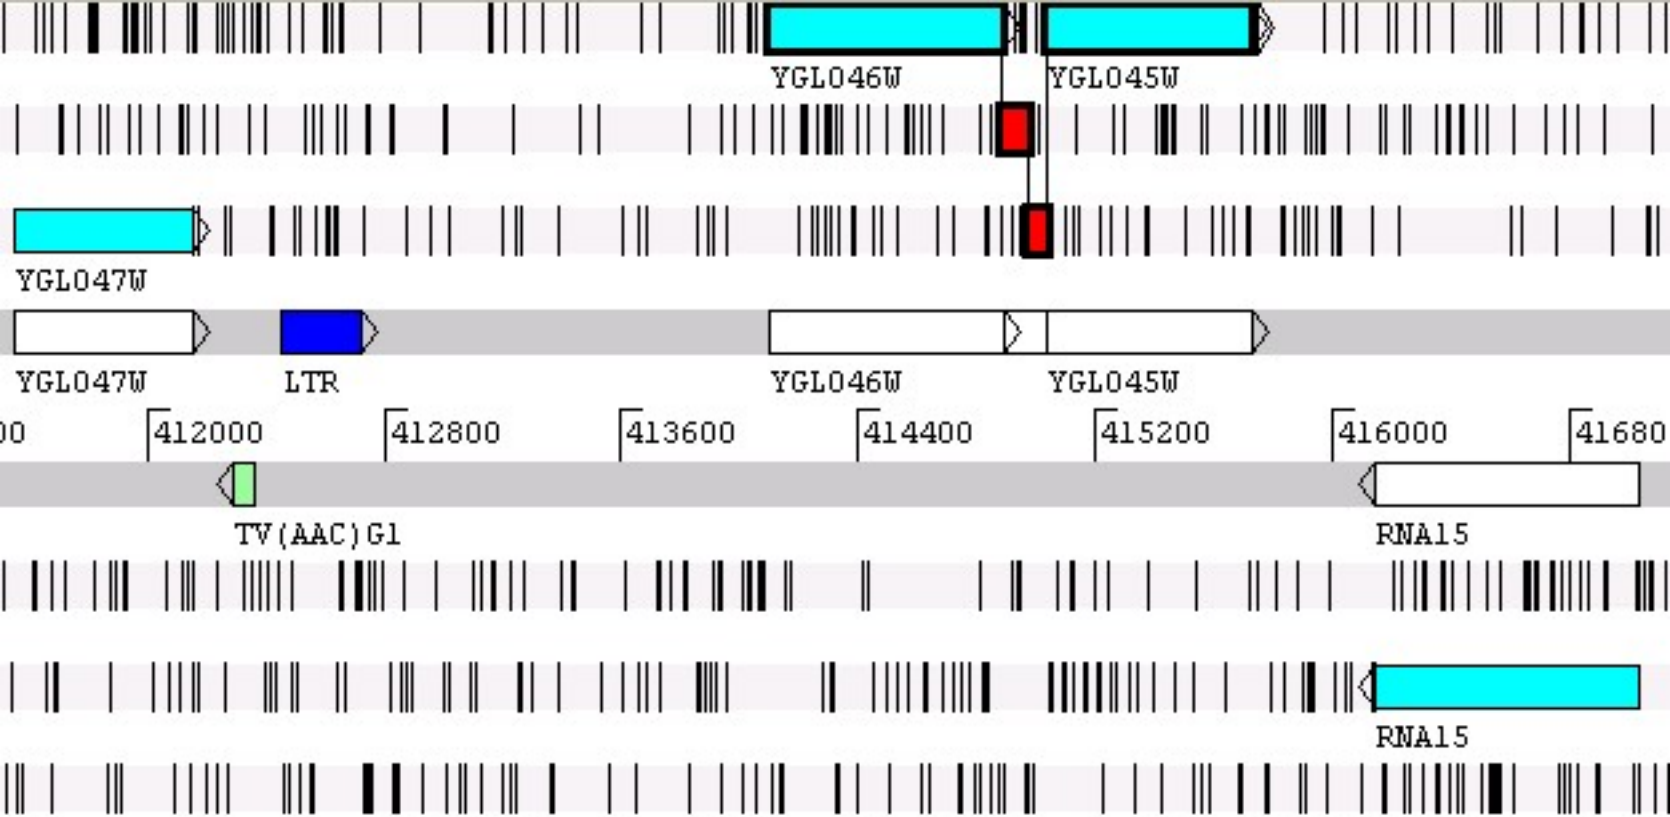

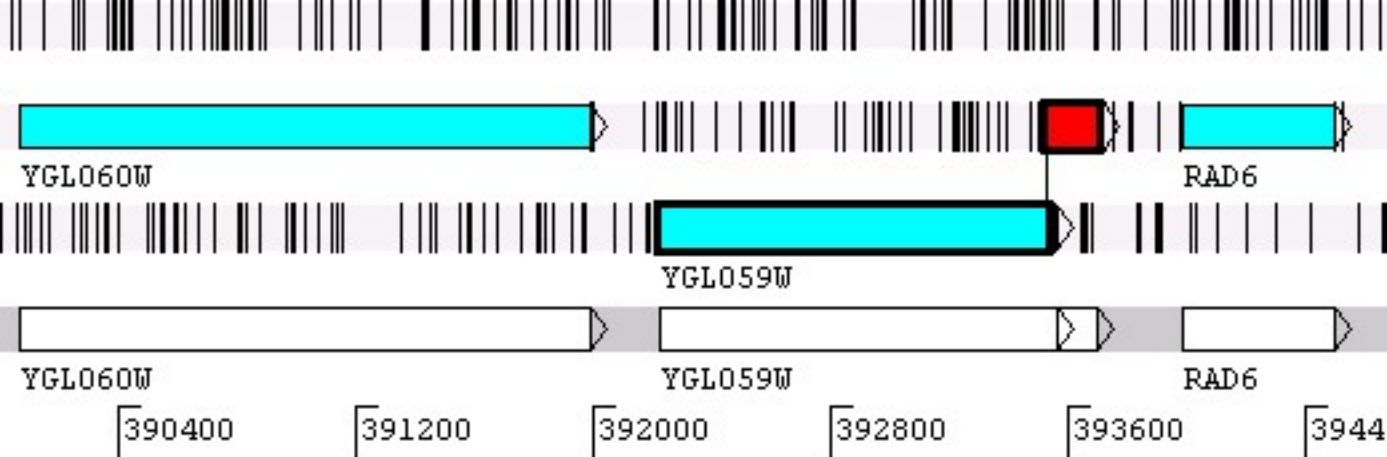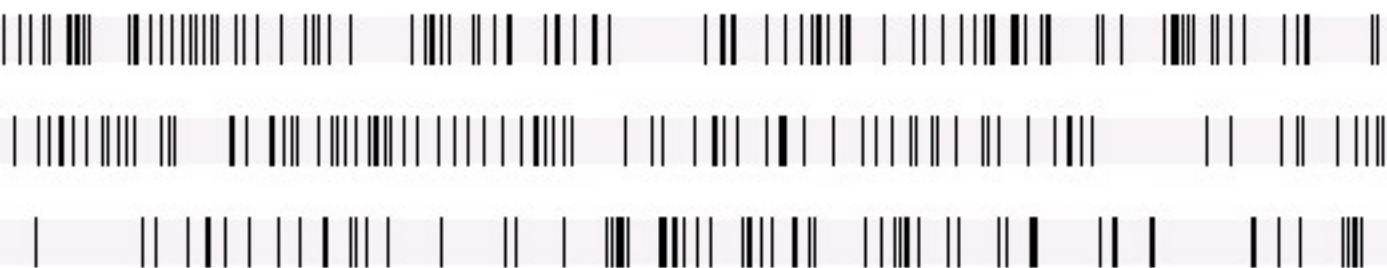

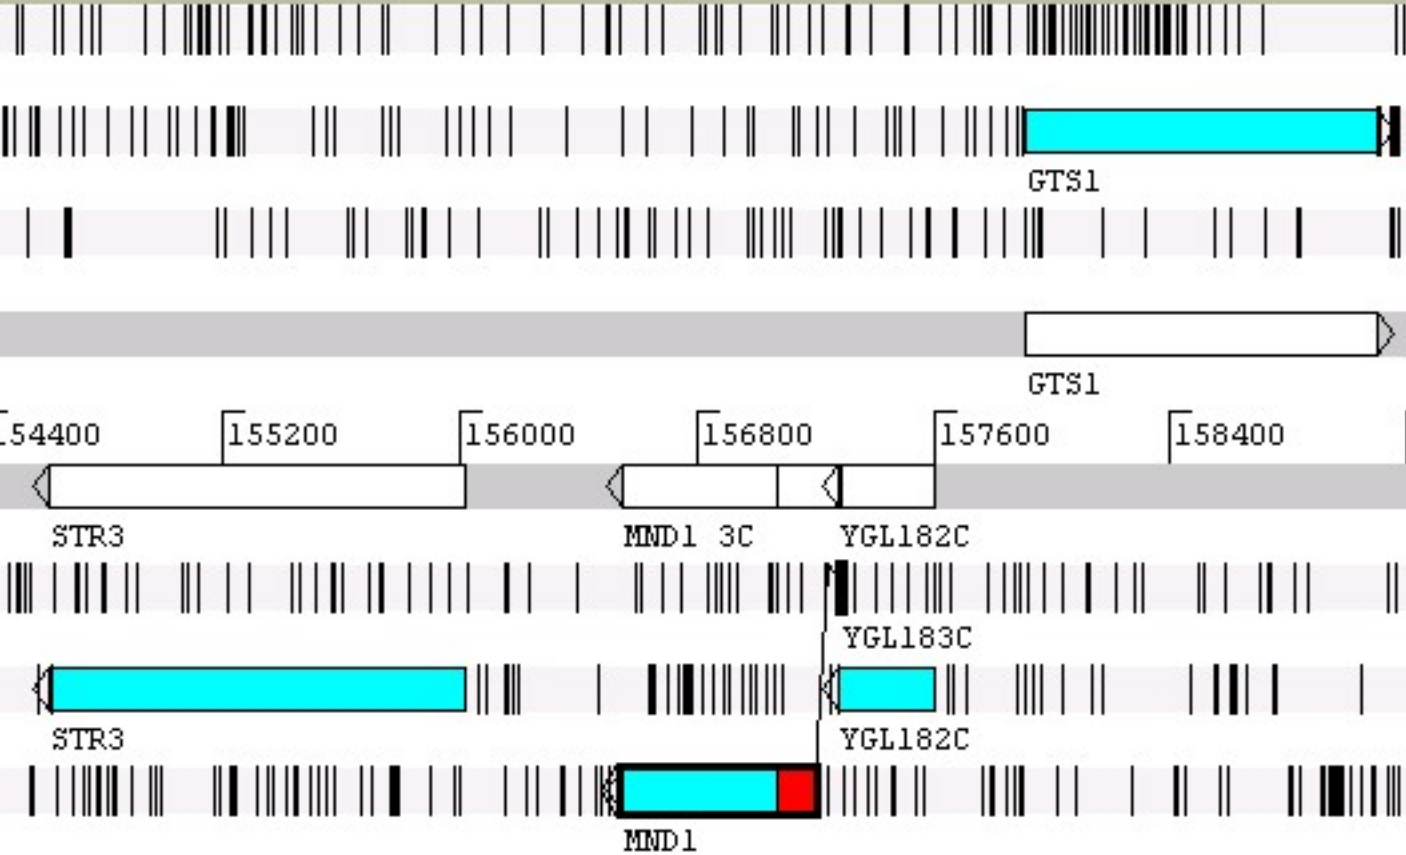

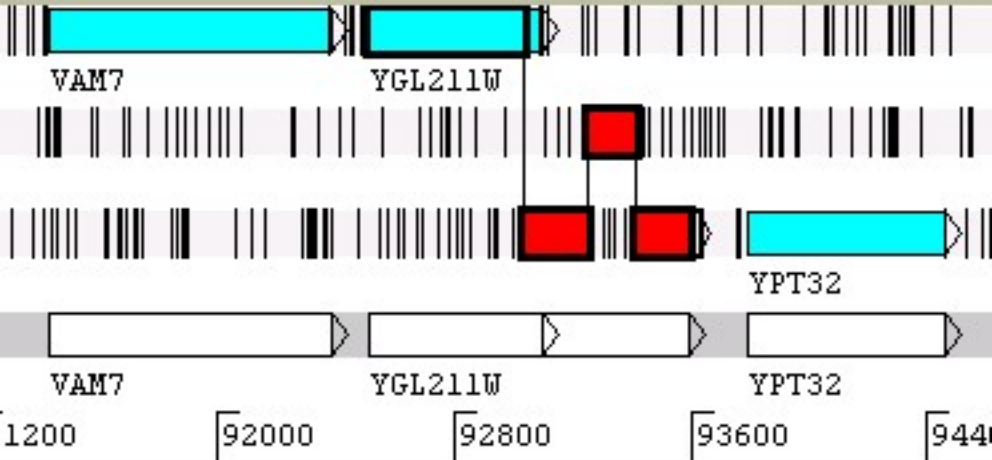

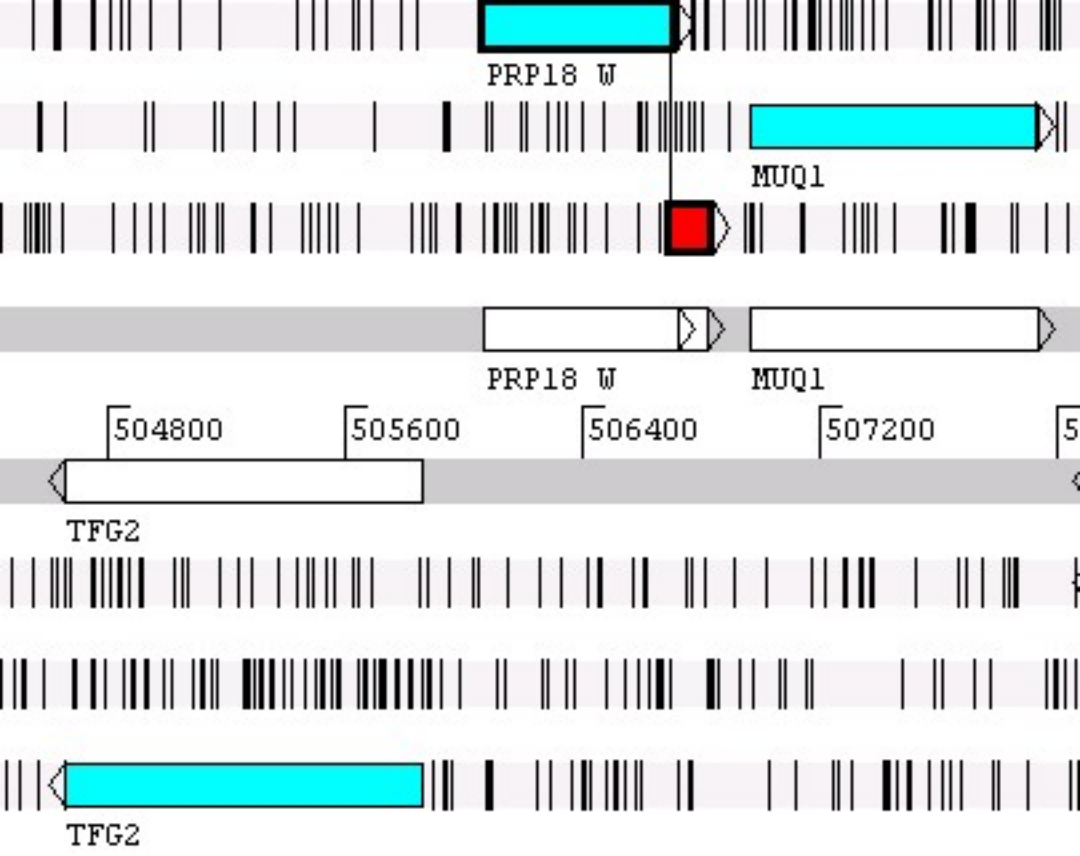

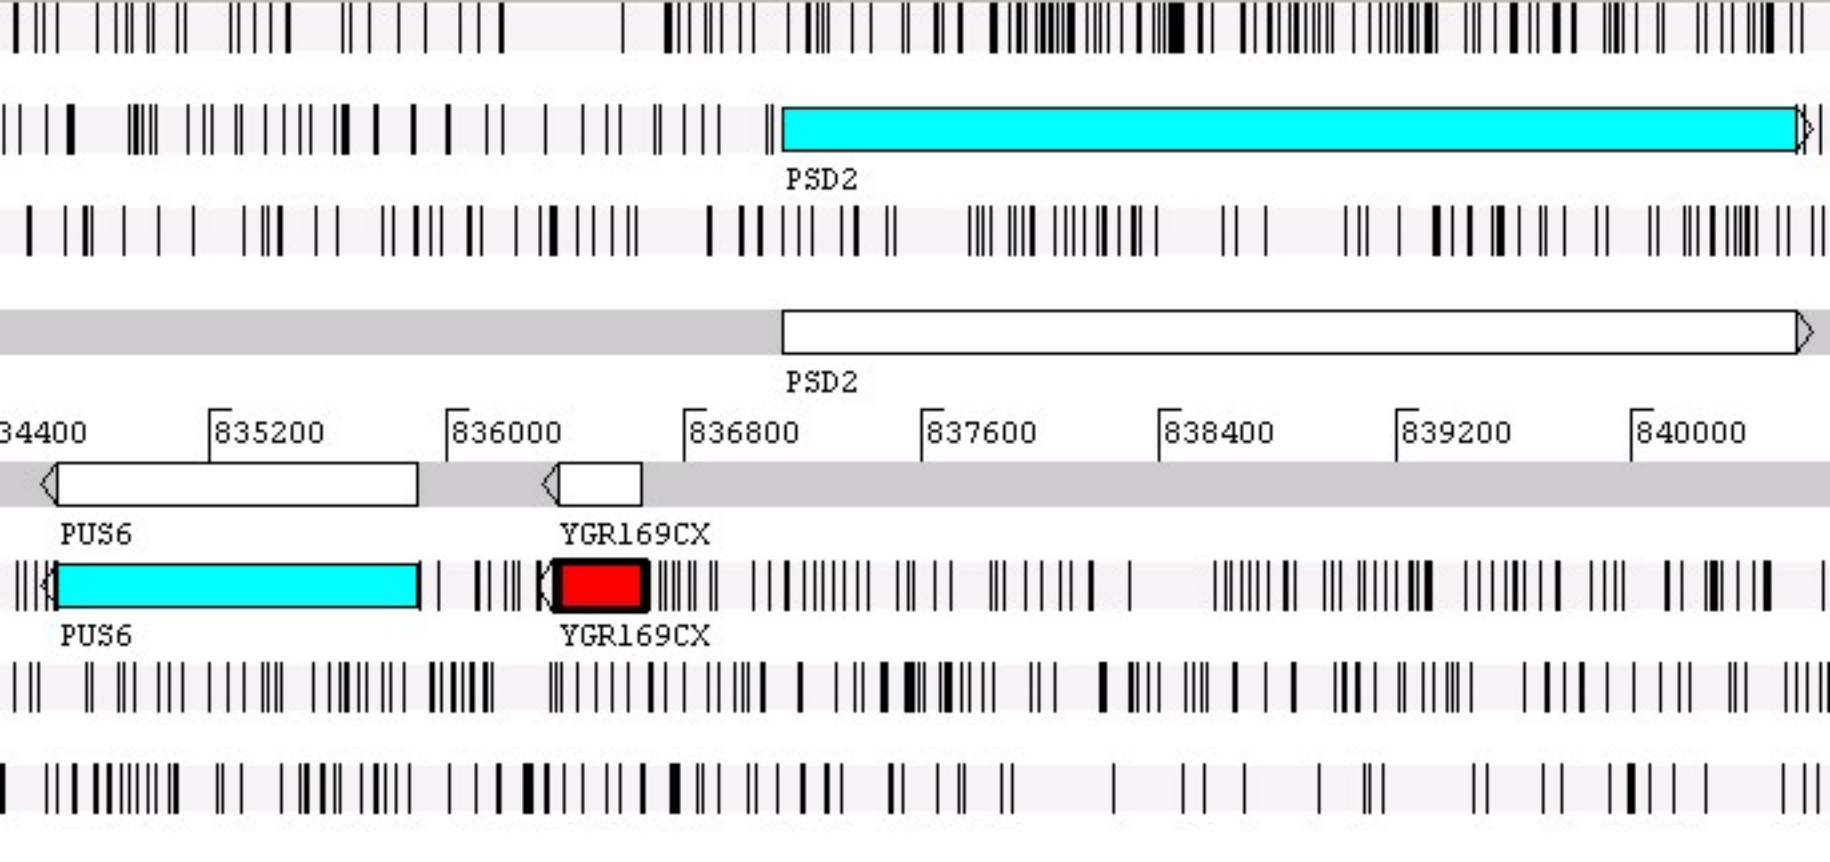

PSD2

PSD2

834400

835200

836000

836800

837600

838400

839200

840000

PUS6

YGR169CX

PUS6

YGR169CX

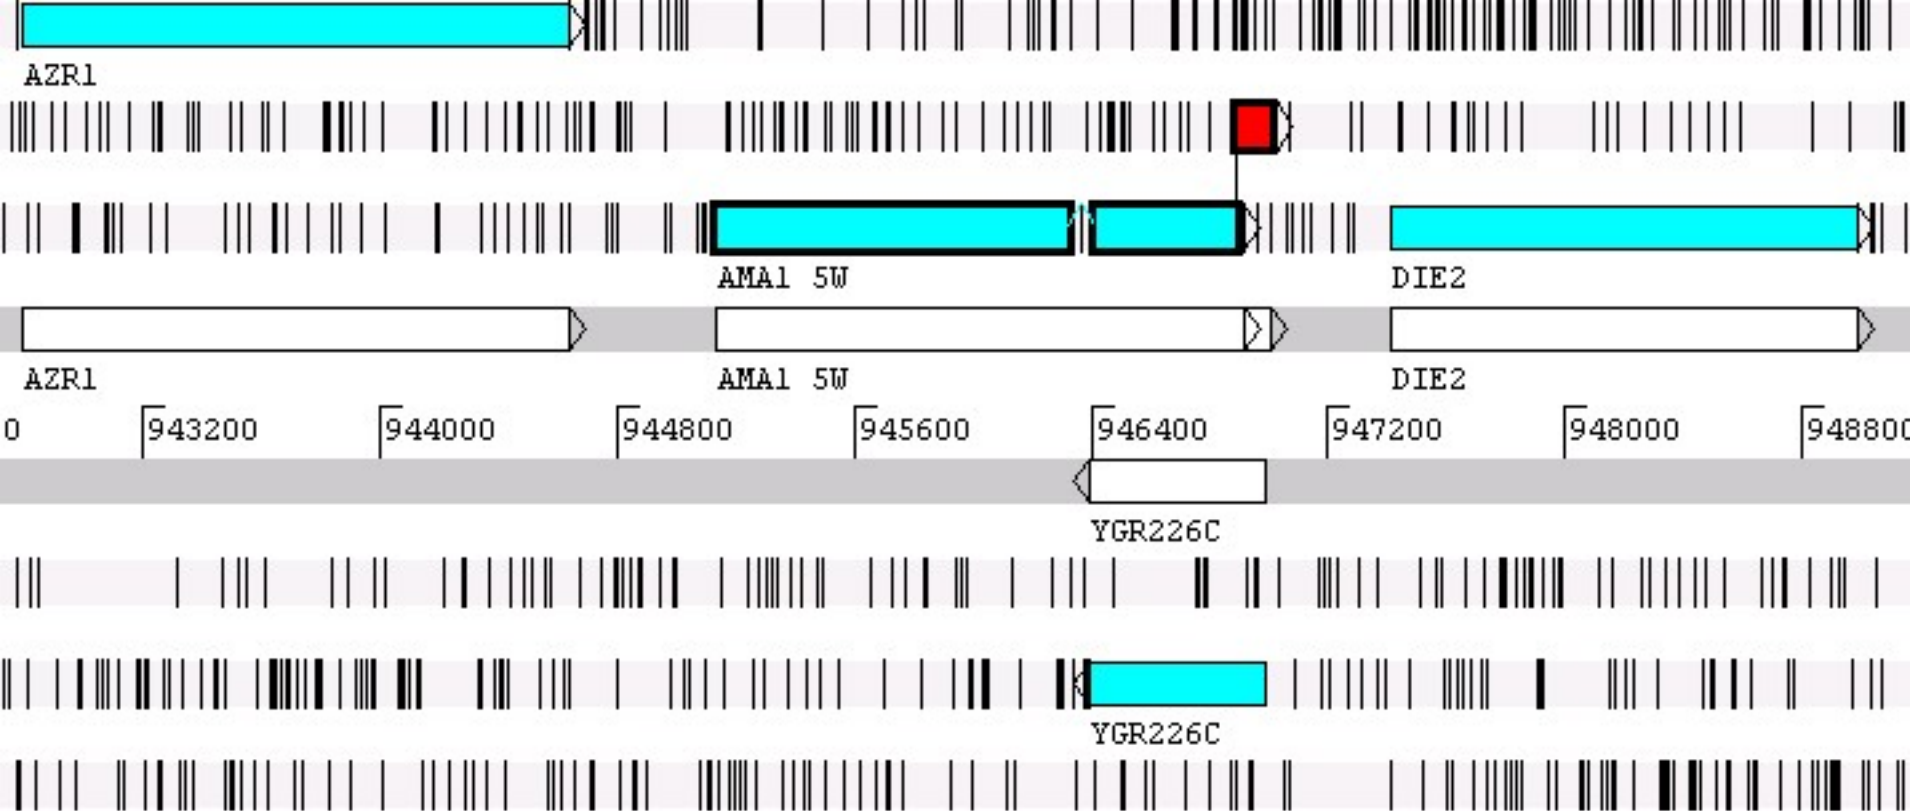



SLH1



SLH1

1032000

1032800

1033600

1034400

1035200

1036000

1036800

1037600

1038400

1039200



YGR271C-A C



YGR273C



YGR272C



YGR273C



YGR271C-A



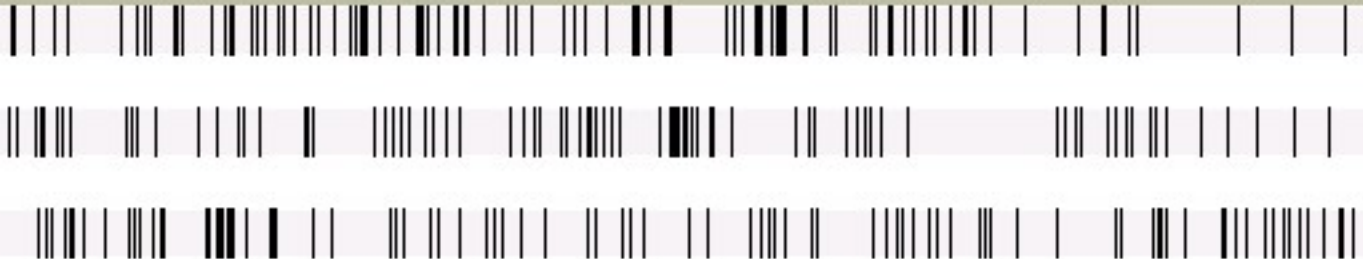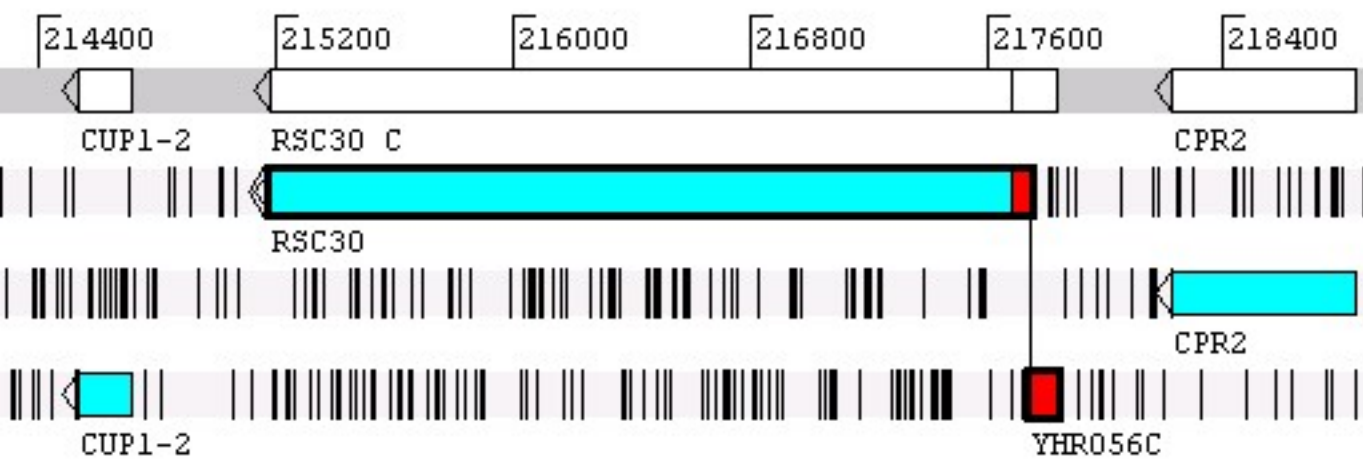

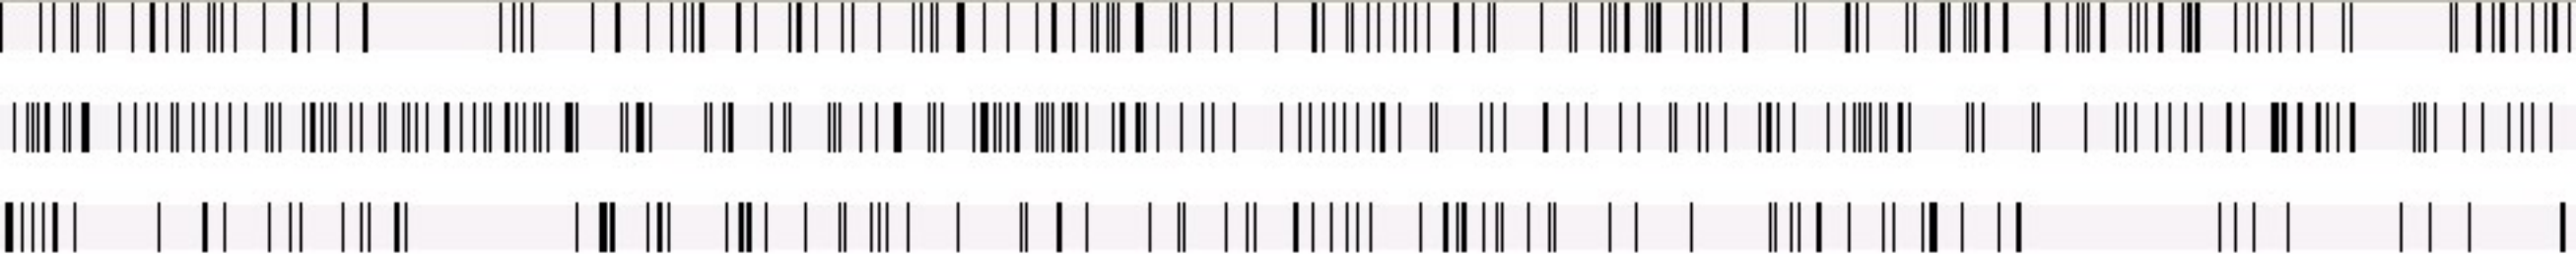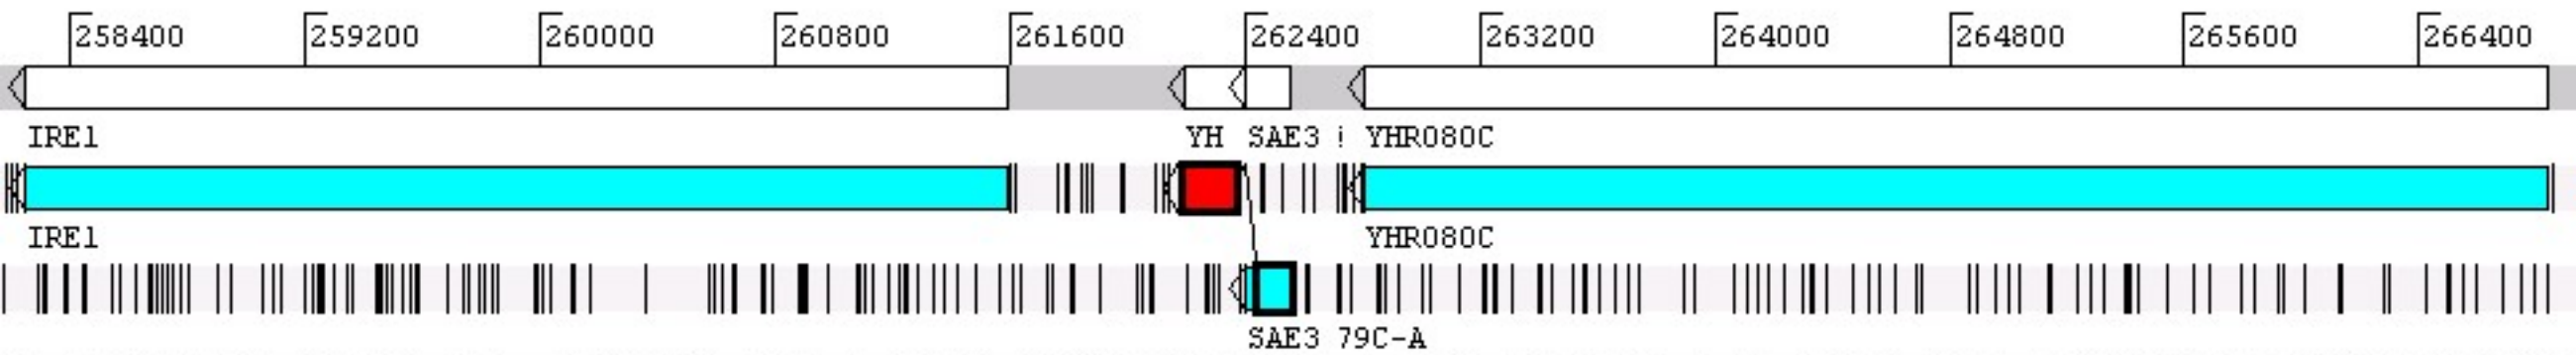

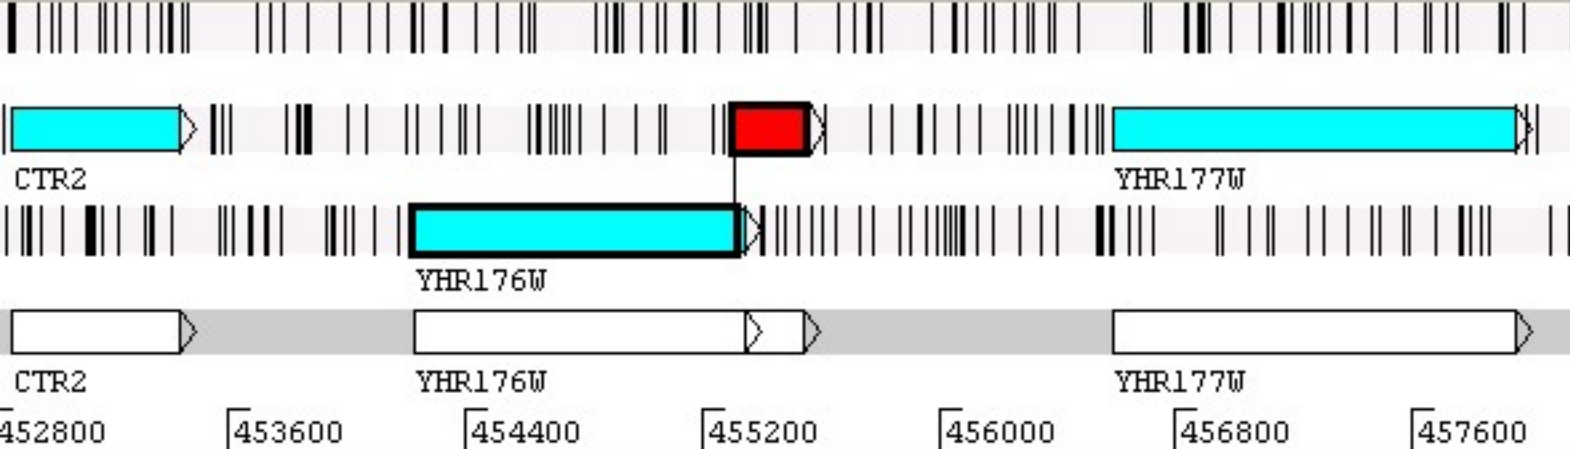

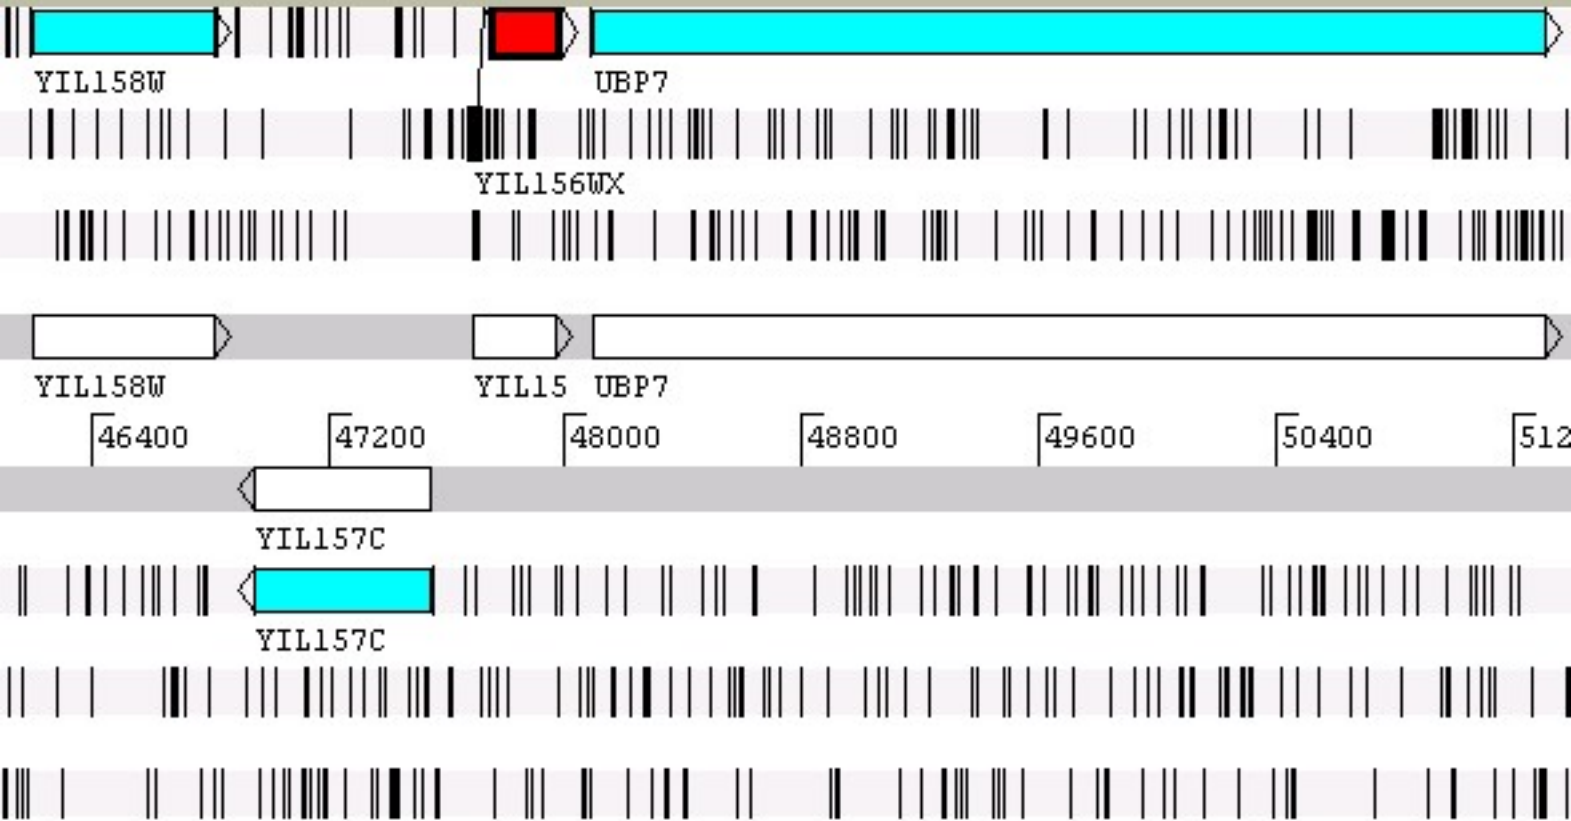

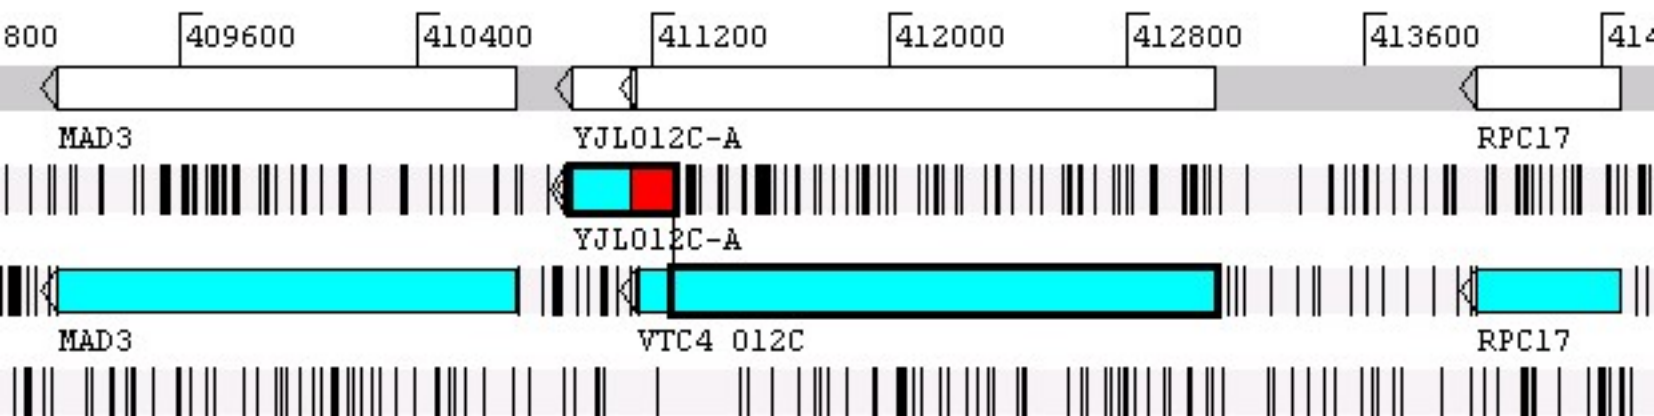

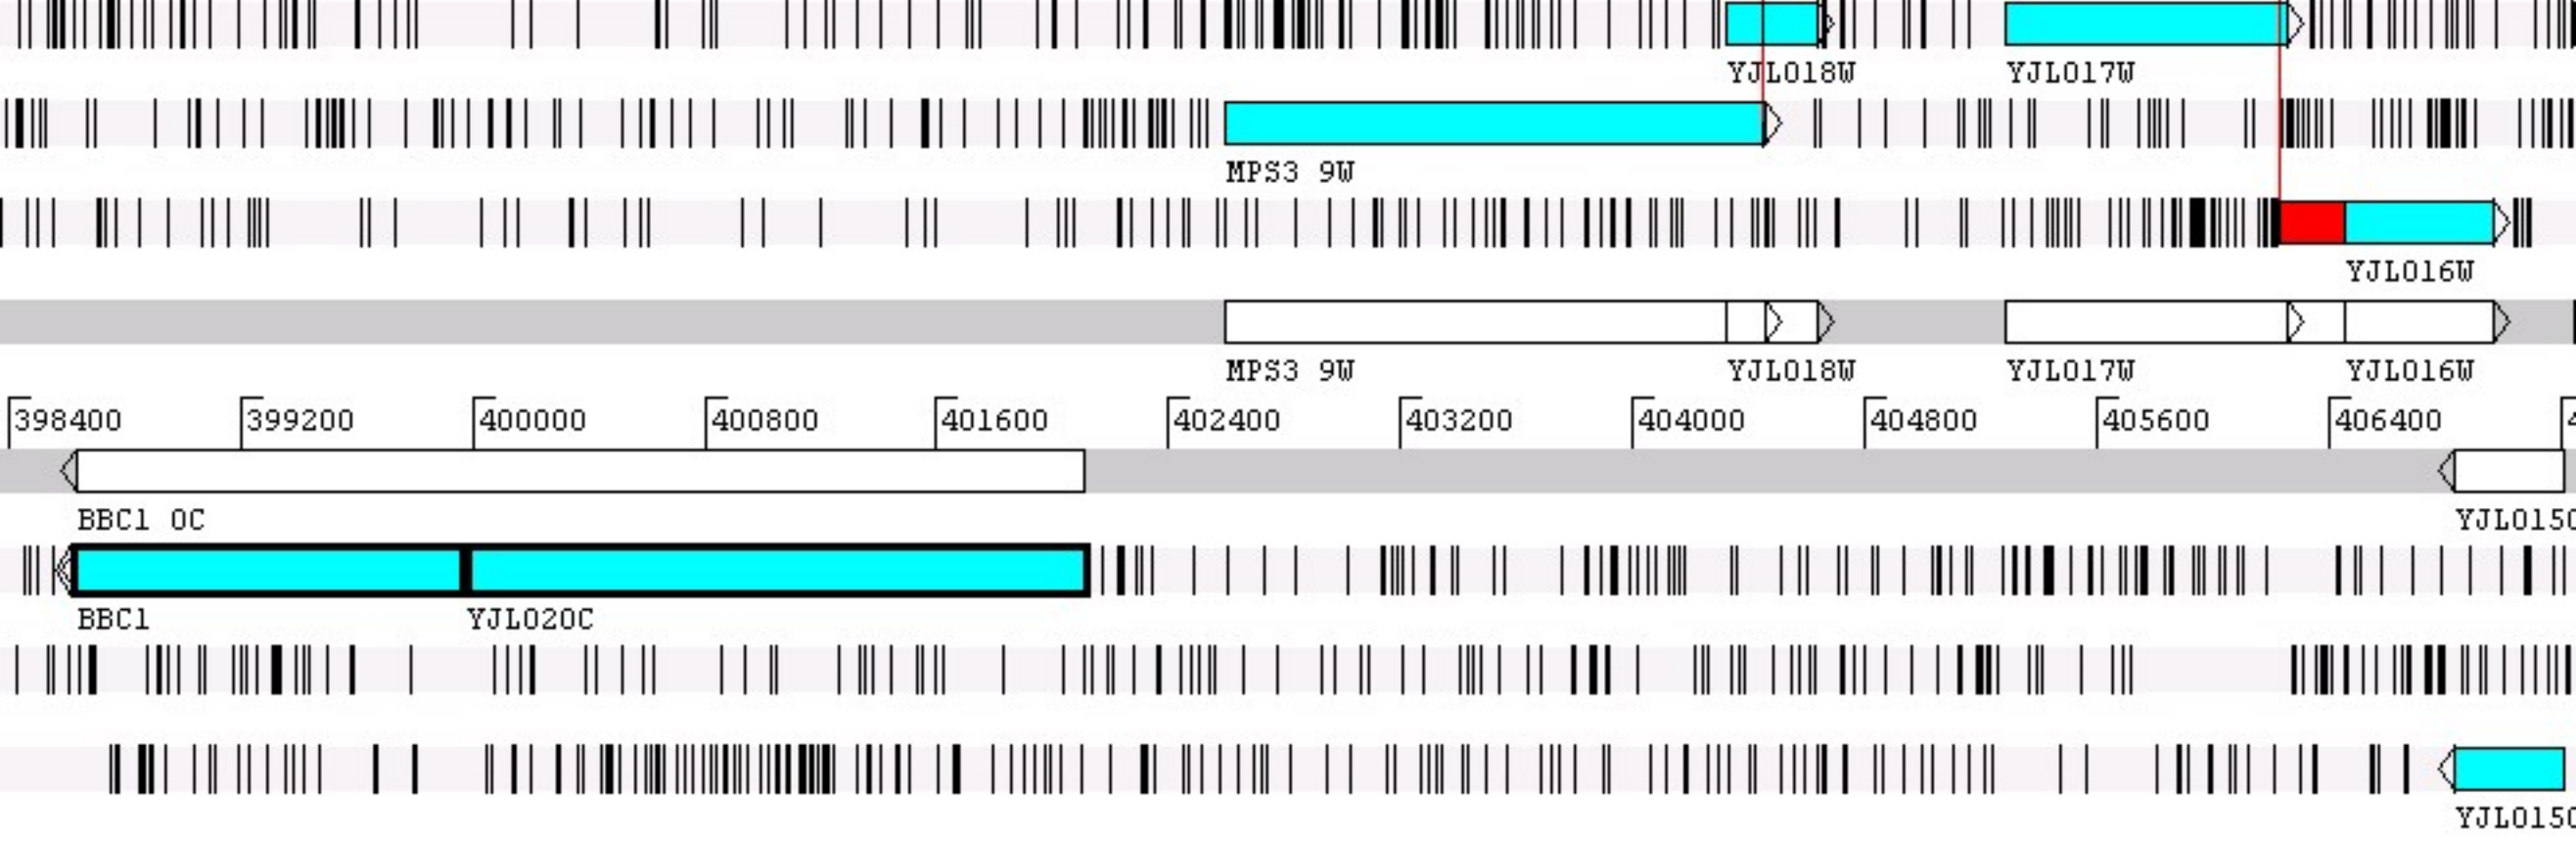

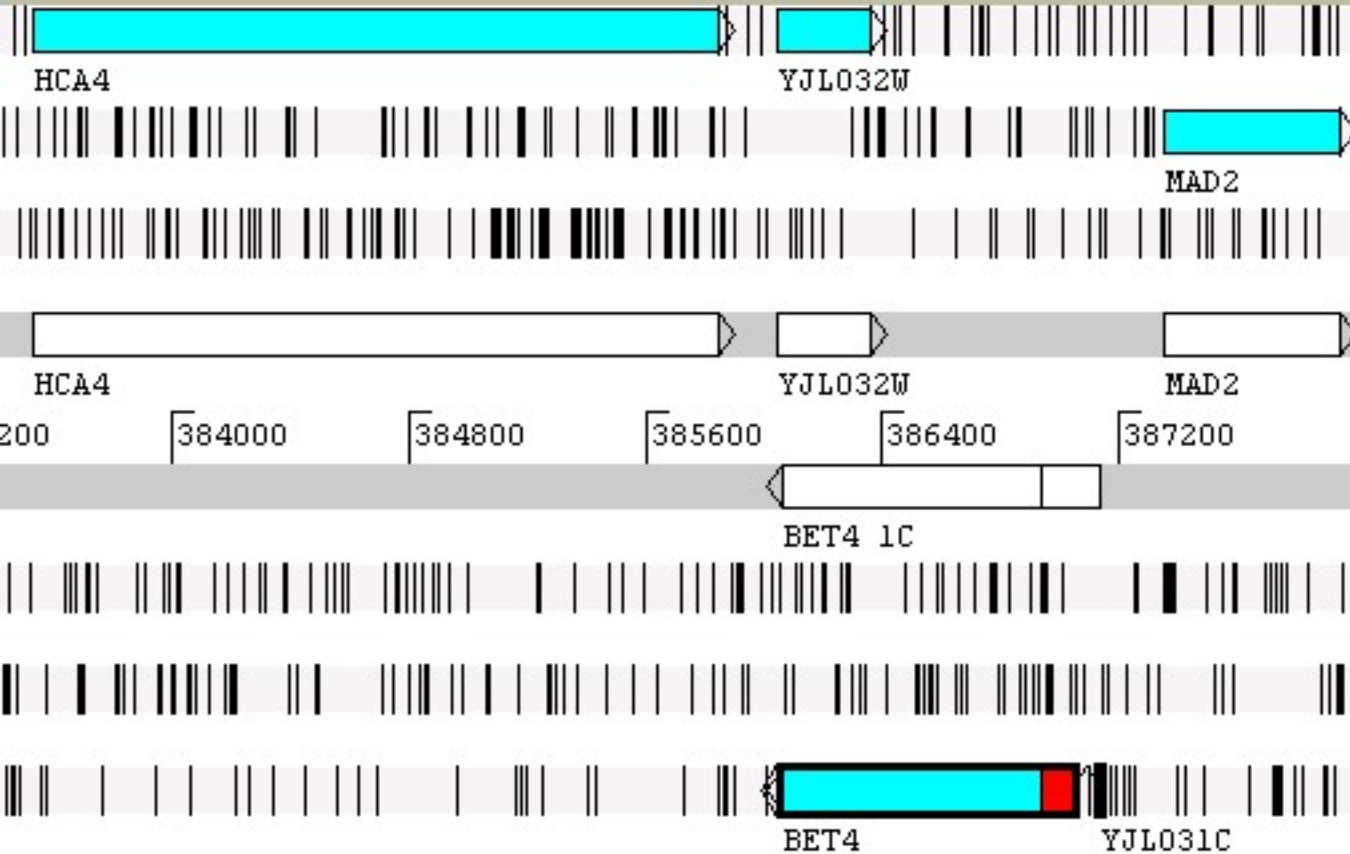

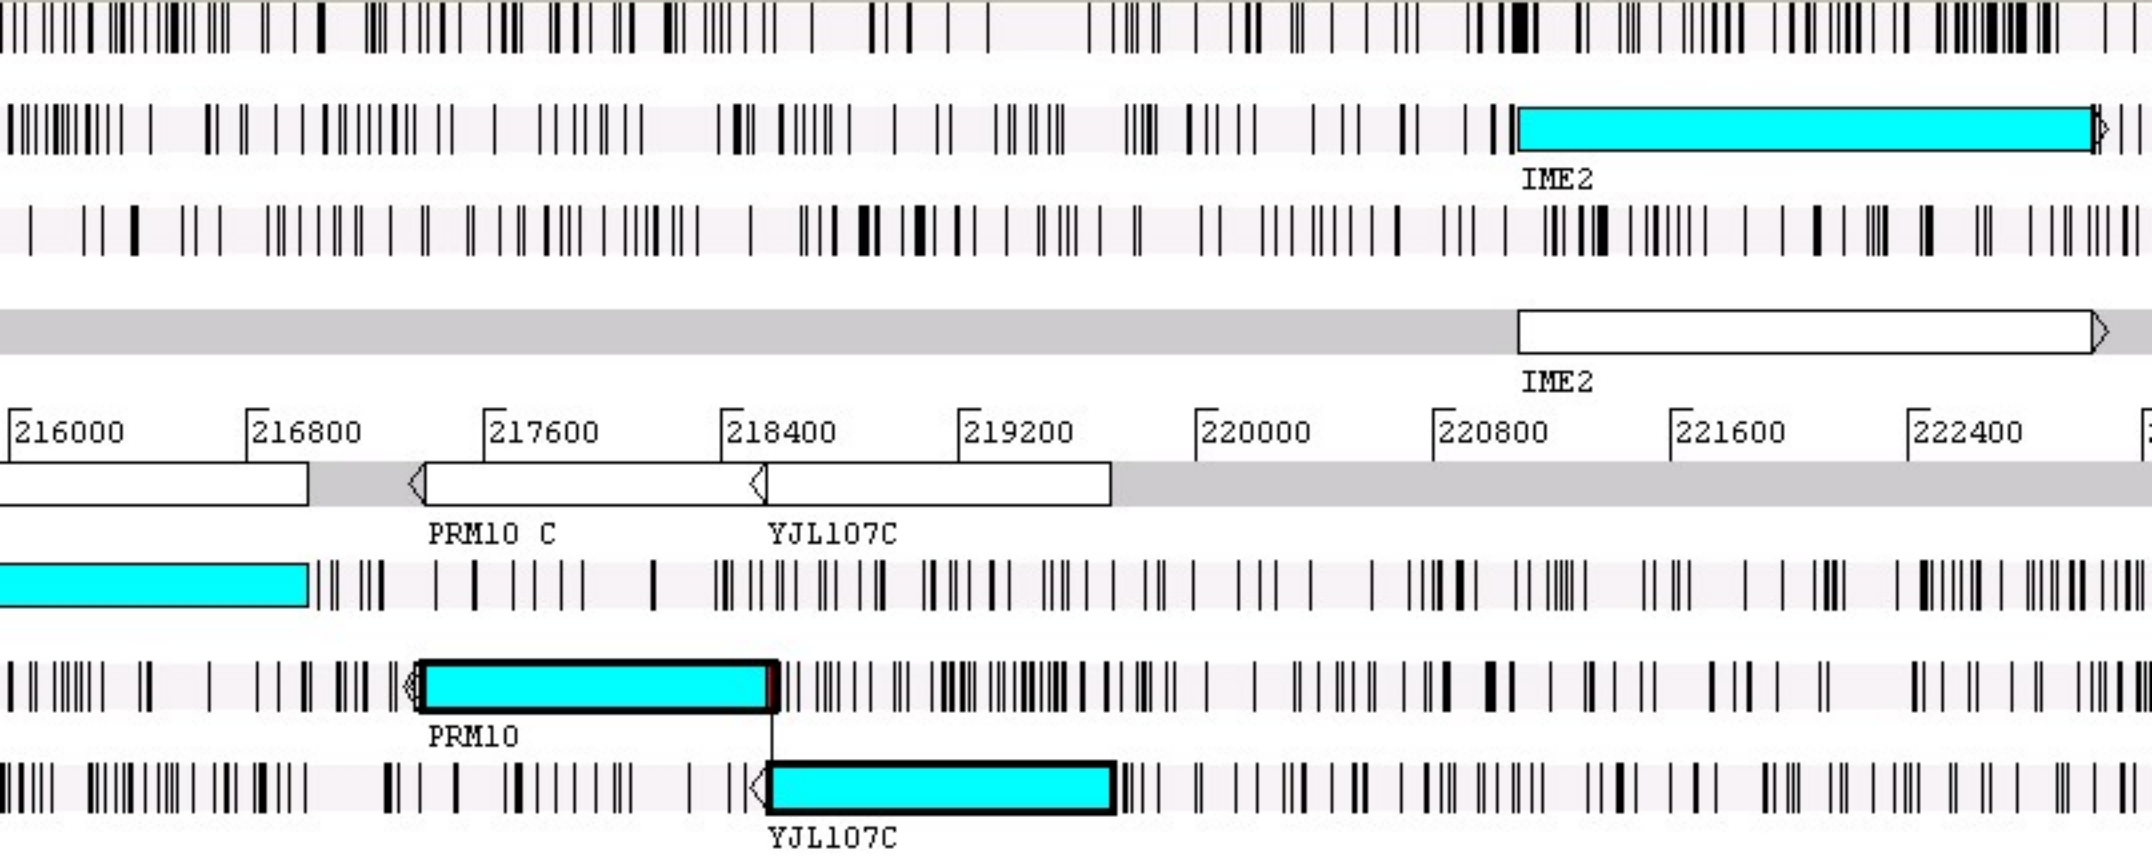



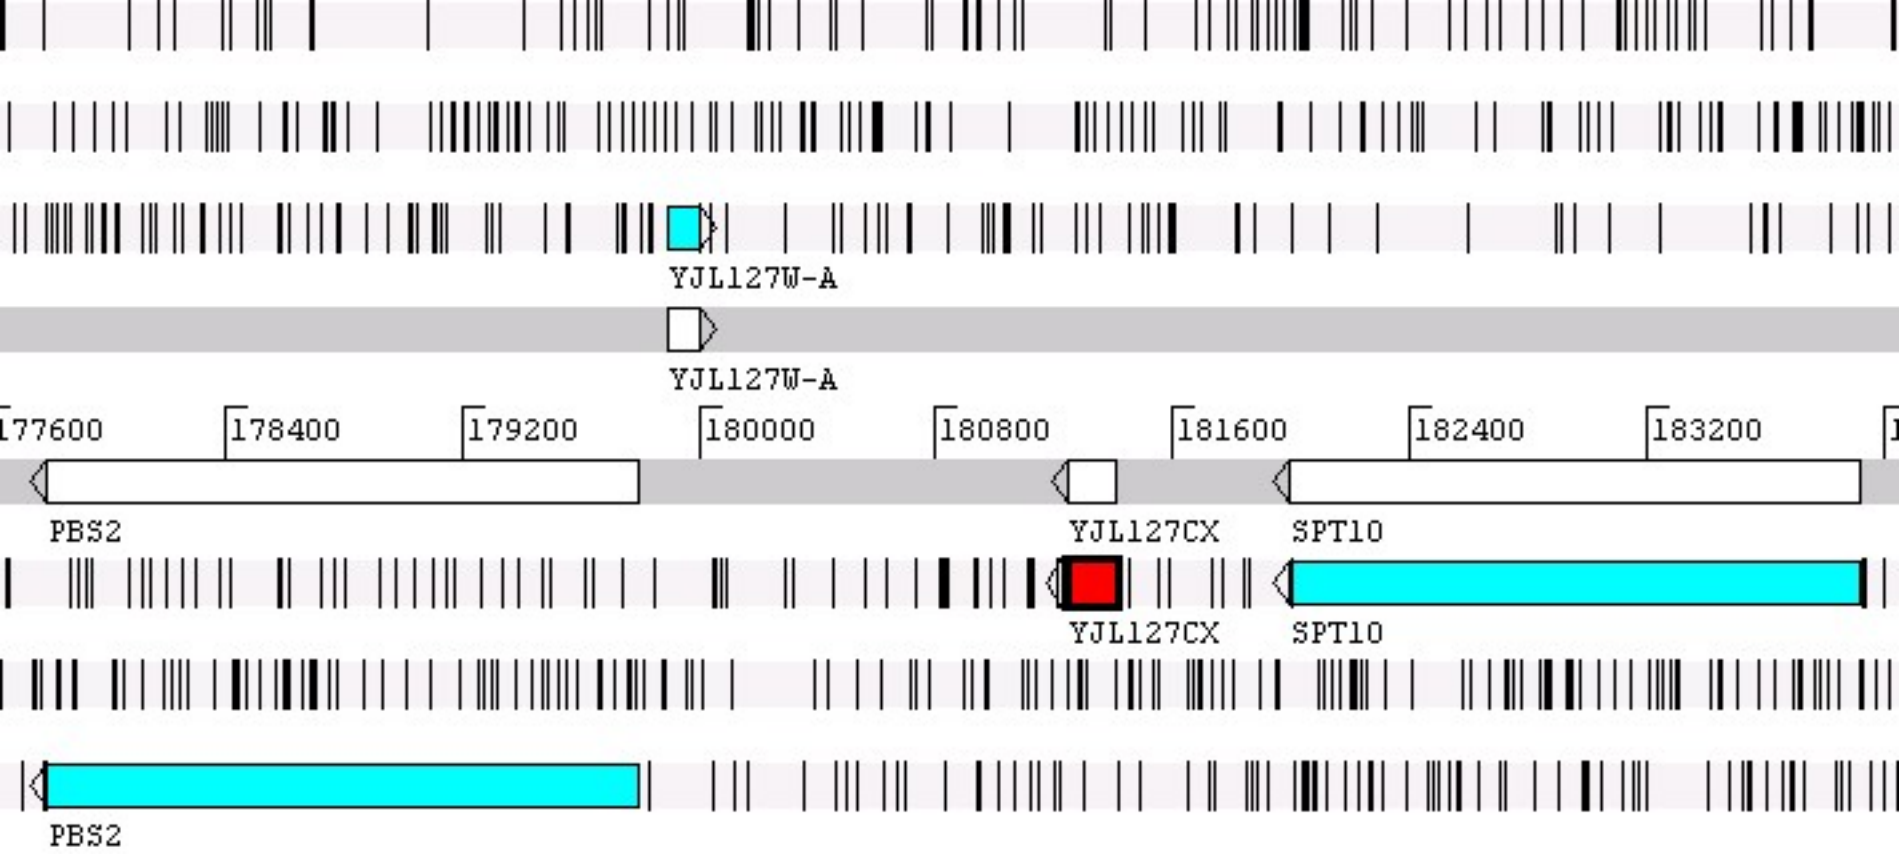

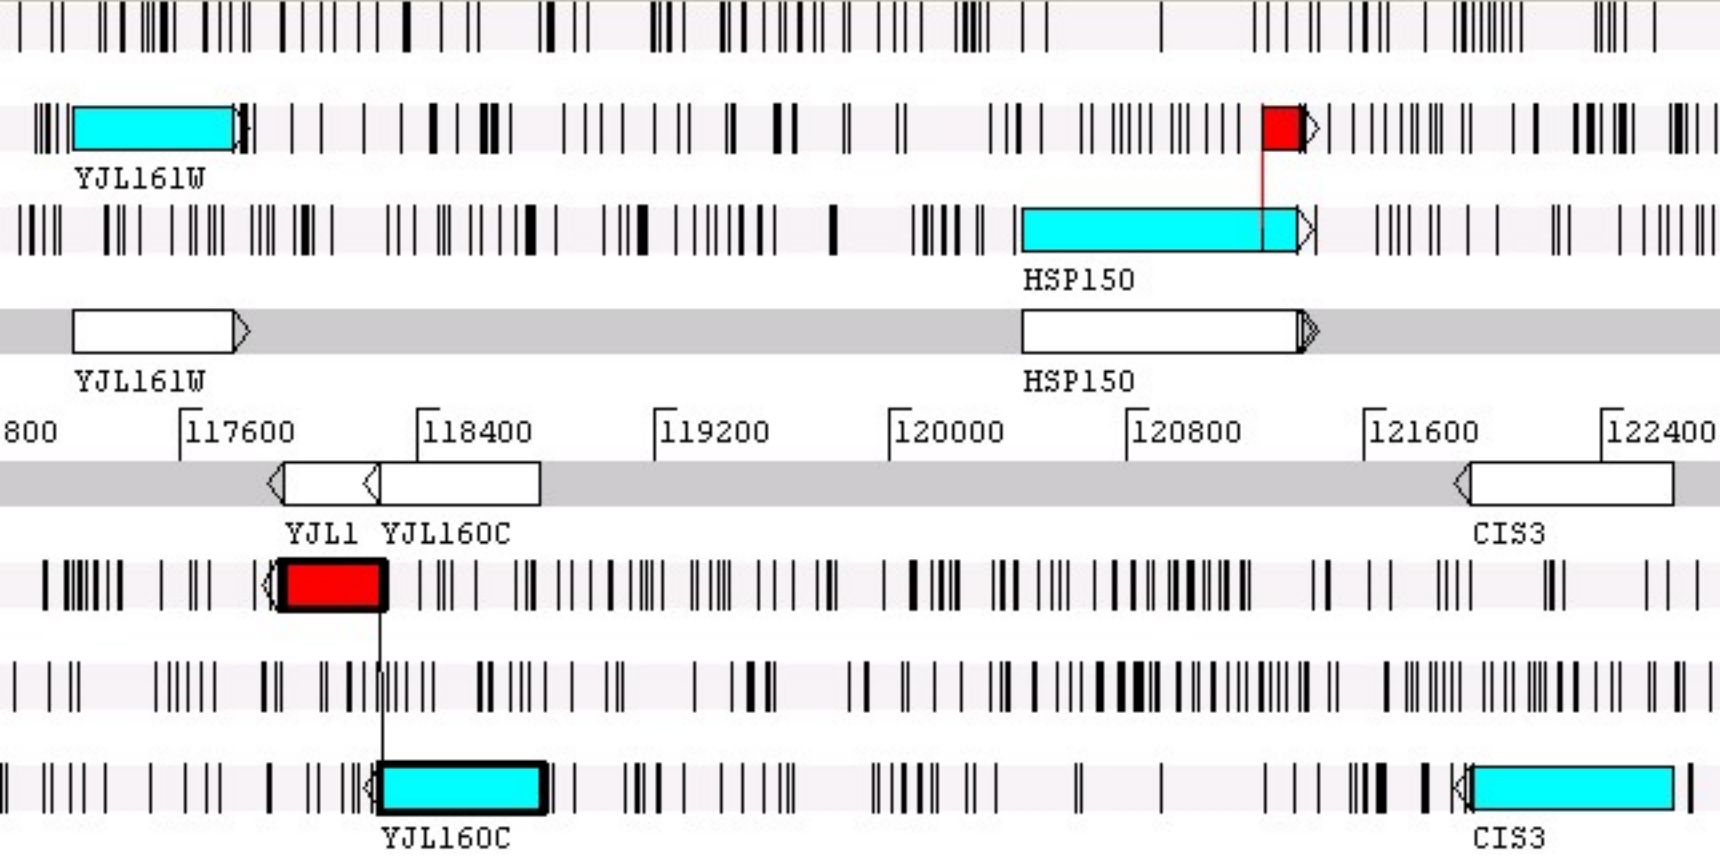

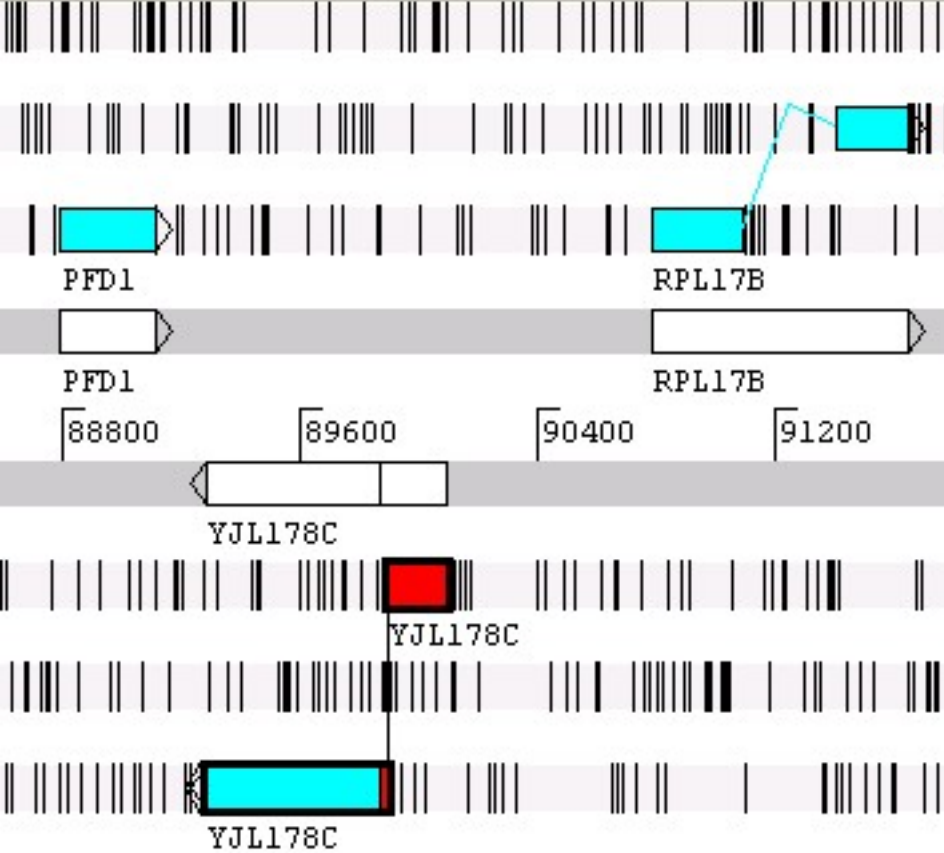

APL1

HYS2

APL1

HYS2

445600

446400

447200

448000

448800

449600

450000

YJR05CX

YJR05CX

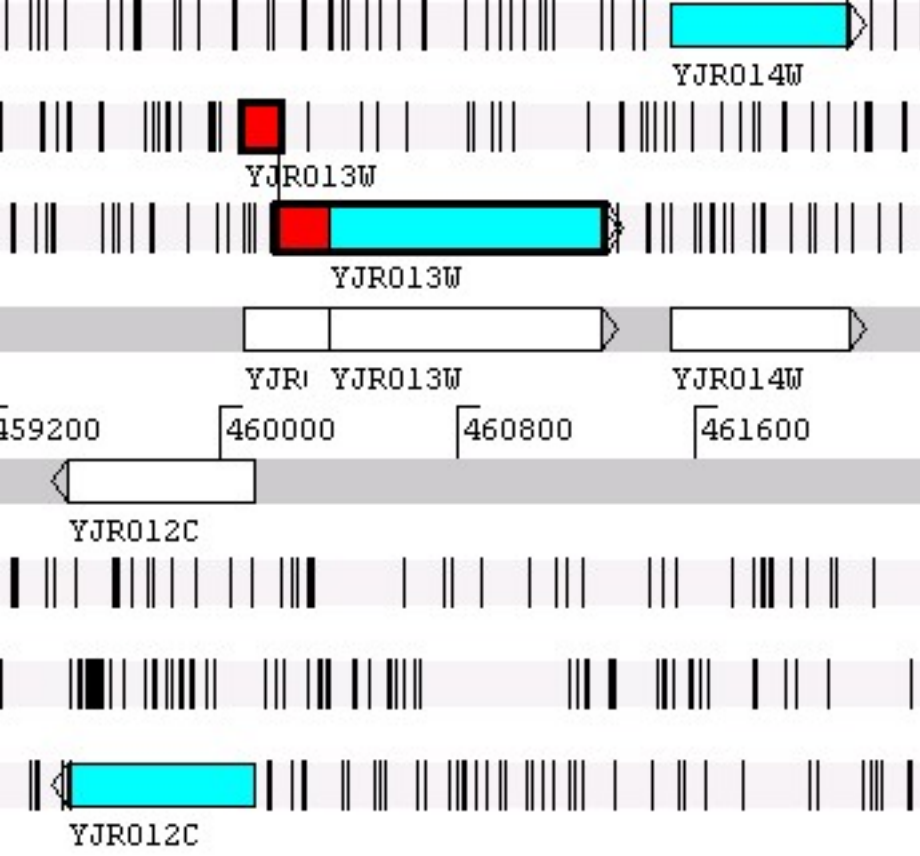

YJR114WX

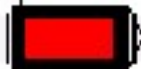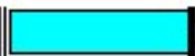

NNF1

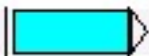

YJR114W

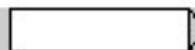

NNF1

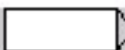

YJR114WX

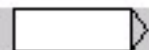

YJR114W

636800

637600

638400

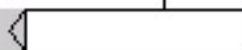

RSM7

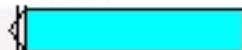

RSM7

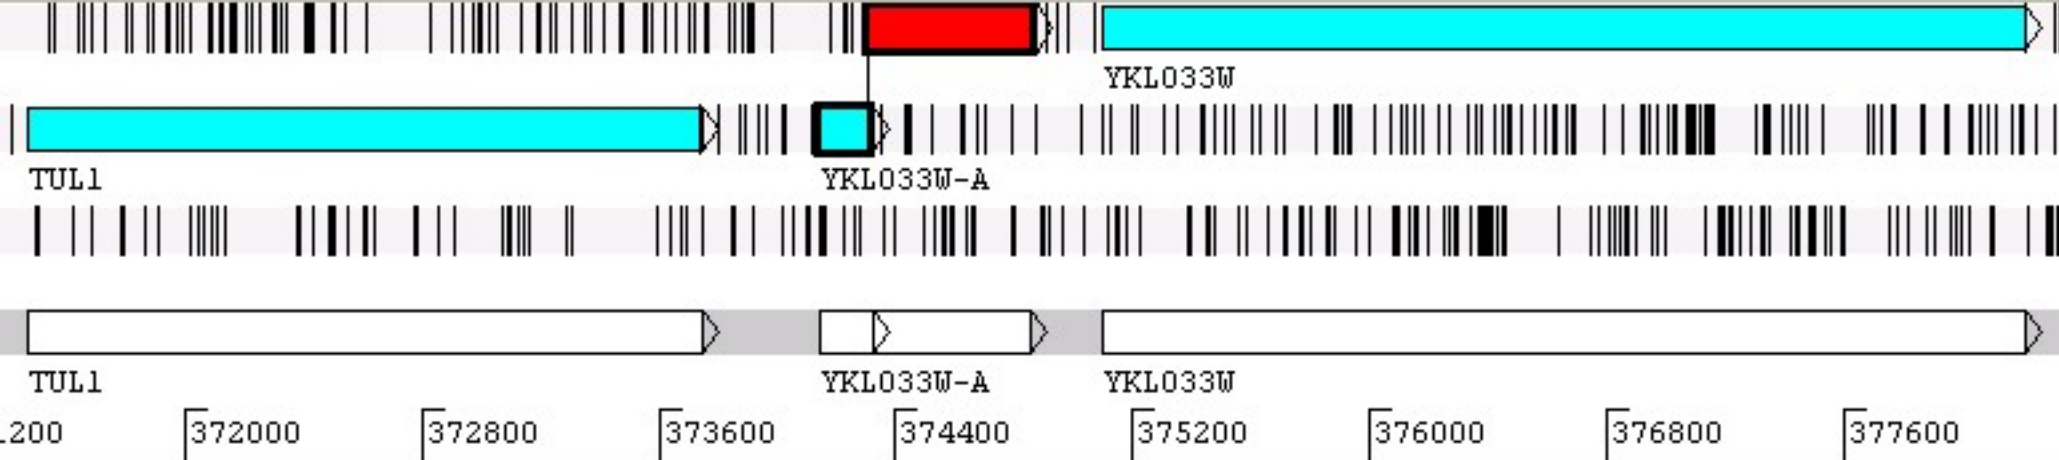

200 372000 372800 373600 374400 375200 376000 376800 377600

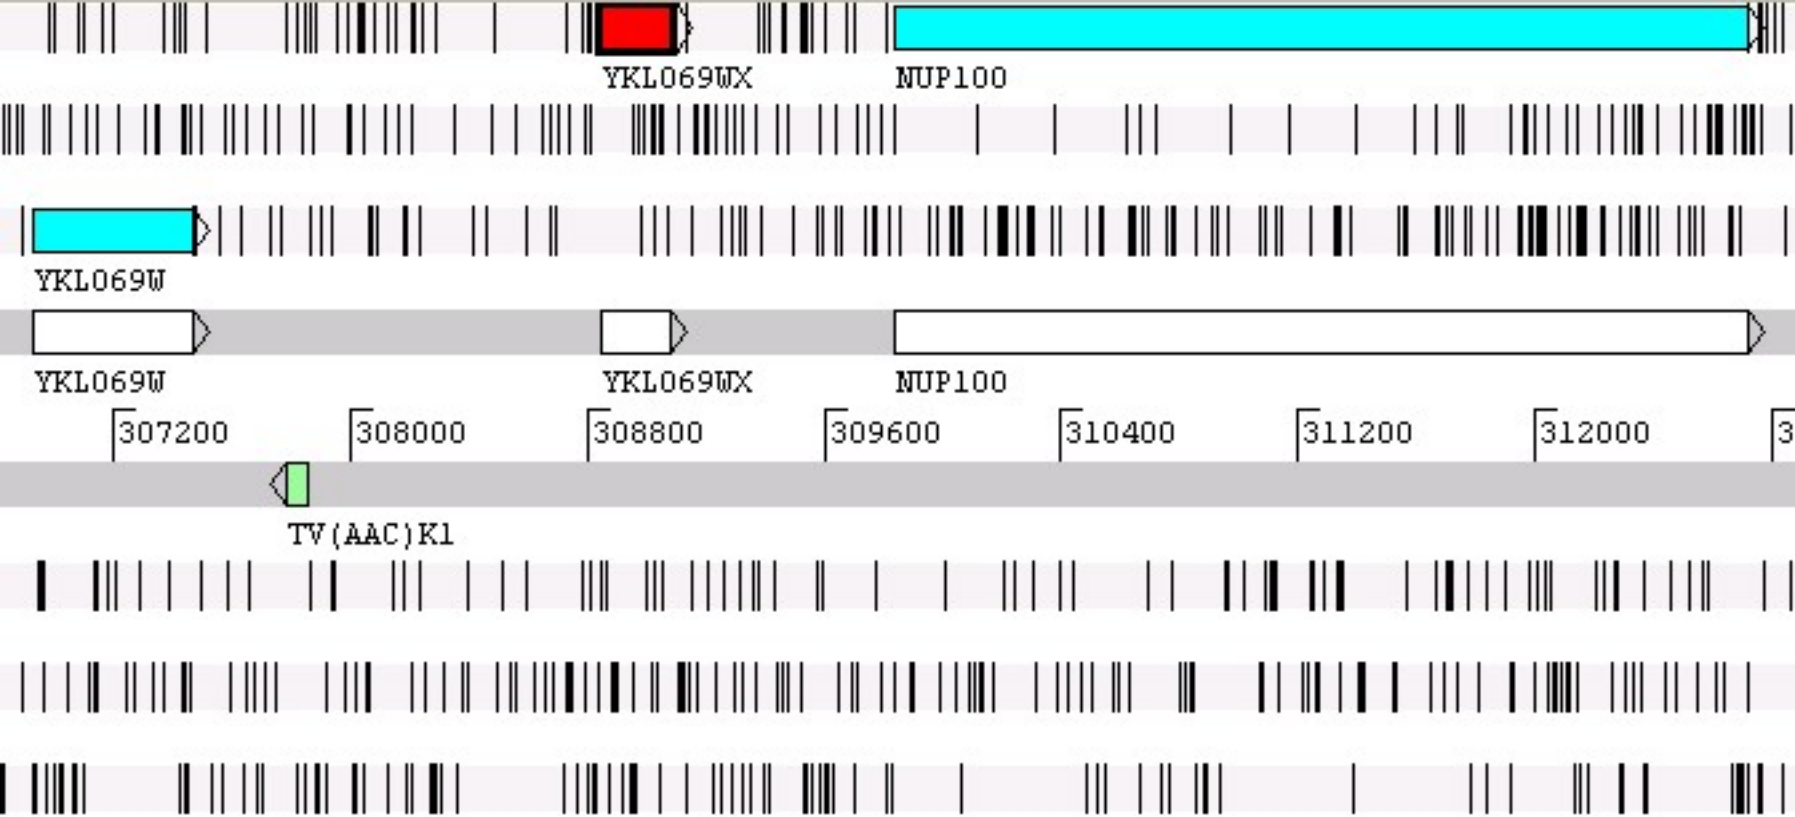



CTK1

The image displays a genomic map with several tracks. The top track shows a cyan bar representing the CTK1 gene. The second track shows a white bar with an arrowhead pointing right, also labeled CTK1. The third track shows a grey bar with a white bar and arrowhead pointing right, labeled CTK1 and YKL137. The fourth track shows a grey bar with two white boxes and arrowheads pointing left, labeled YKL138 and MRPL31. The fifth track shows a red box and a cyan box, labeled YKL138CX and RPL31. The sixth track is a light grey bar. The seventh track is a light grey bar. The eighth track is a light grey bar. The background consists of vertical black bars of varying heights representing genomic features. Numerical markers 183200, 184000, 184800, and 185600 are placed on the grey bar.

YKL137

CTK1

YKL137

183200

184000

184800

185600

YKL138 MRPL31

YKL138CX RPL31

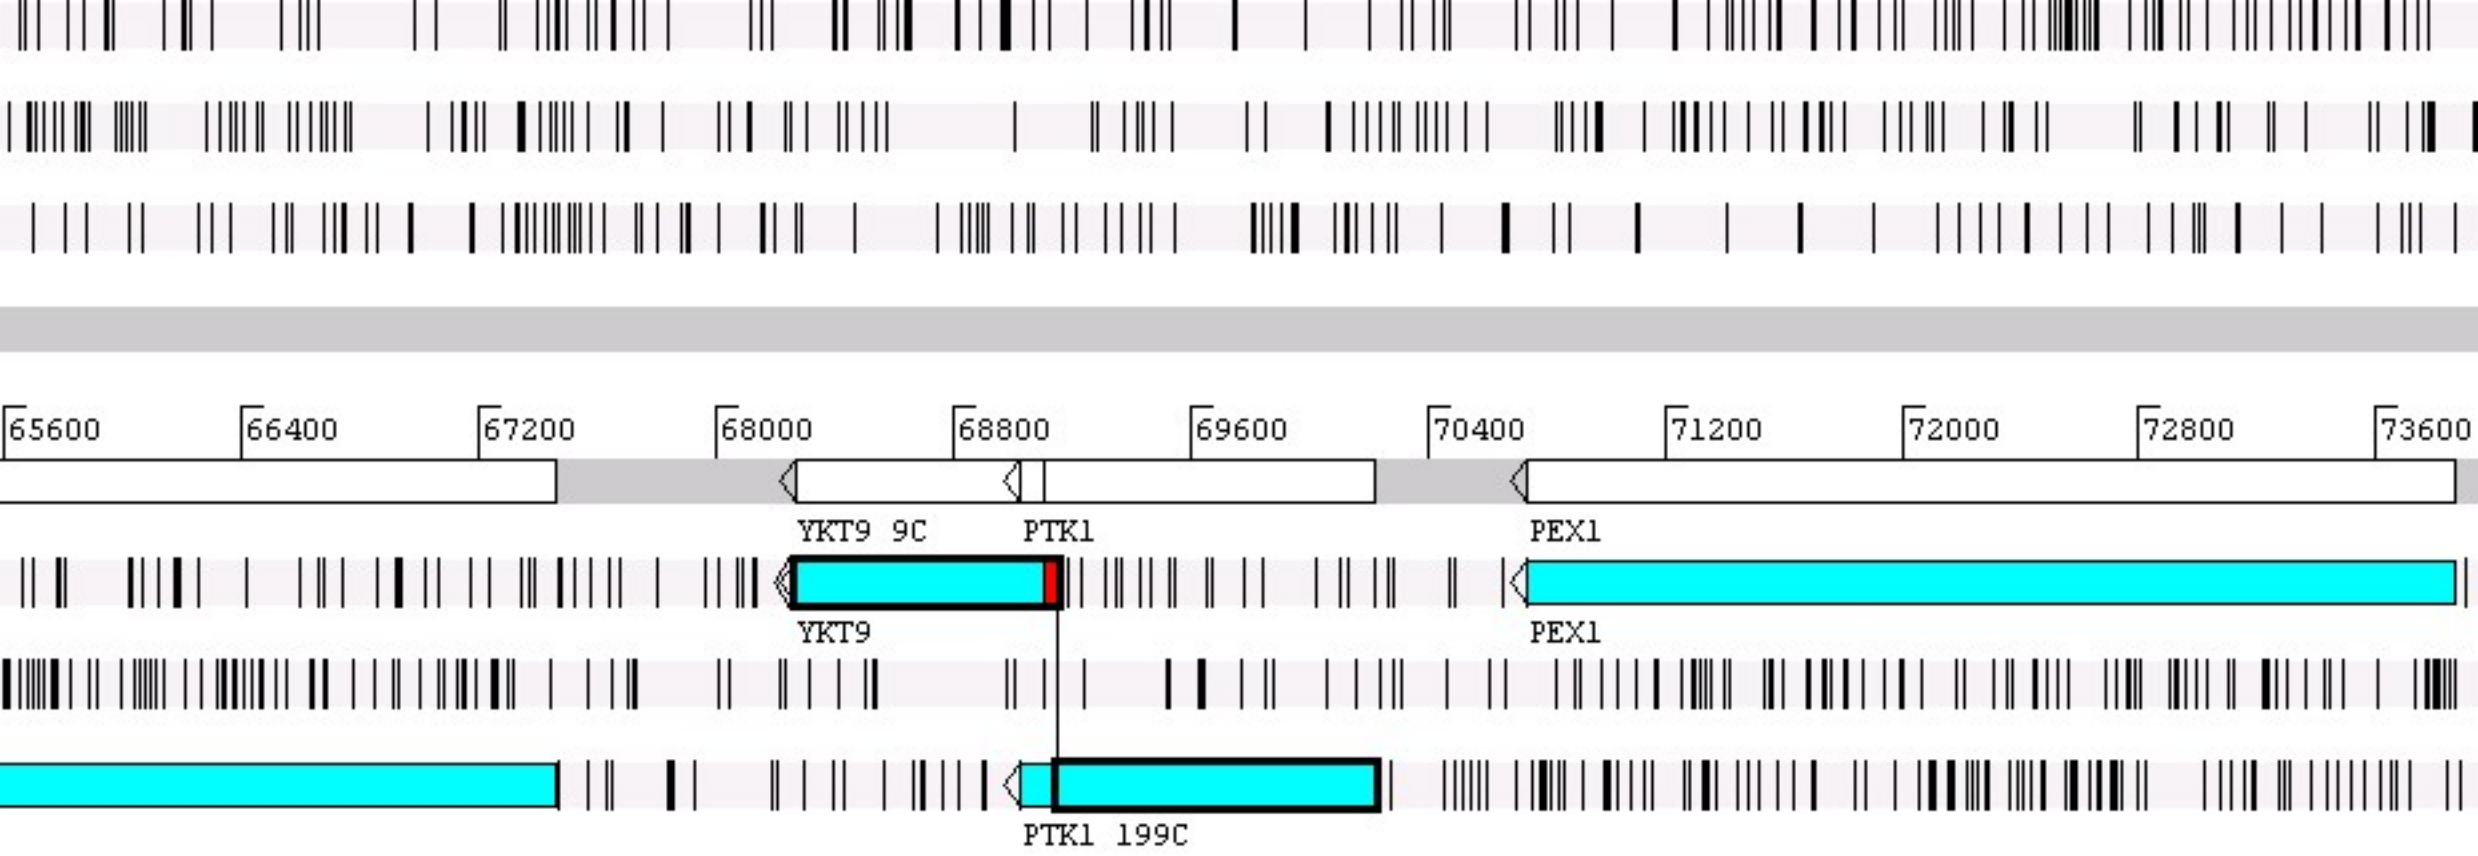

CBT1

YKL207W

Detailed description: This diagram shows the interaction between CBT1 and YKL207W. The top track shows a cyan bar representing CBT1. The second track shows a red bar representing YKL207W with a line connecting it to the CBT1 bar. The third track shows a cyan bar representing YKL207W. The bottom track shows two white bars representing CBT1 and YKL207W. A grey bar below the CBT1 and YKL207W labels indicates a region from 47200 to 49600. A white bar representing YKL206C is shown below the grey bar, pointing left towards the YKL207W label.

YKL207W

CBT1

YKL207W

47200

48000

48800

49600

YKL206C

YKL206C

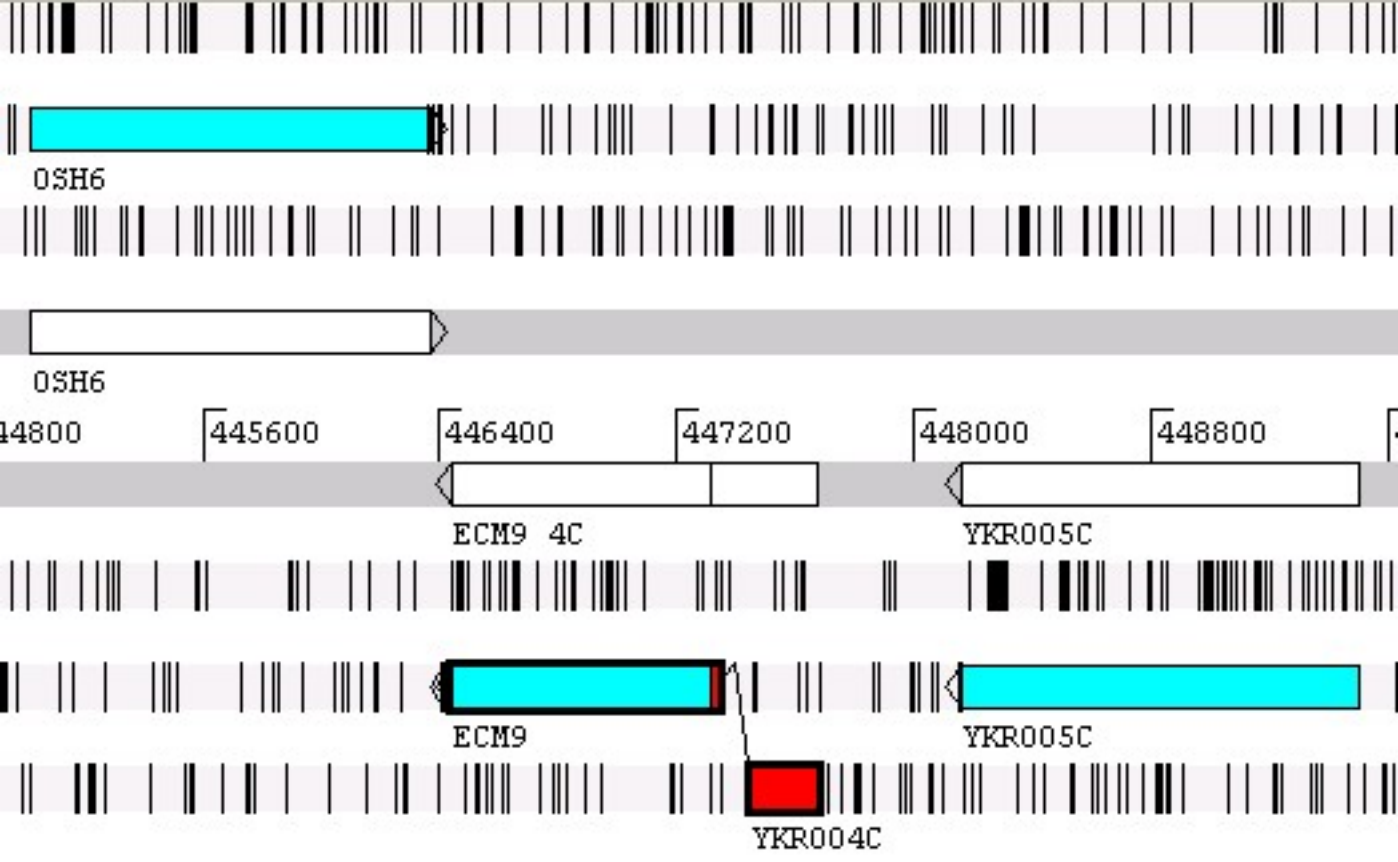

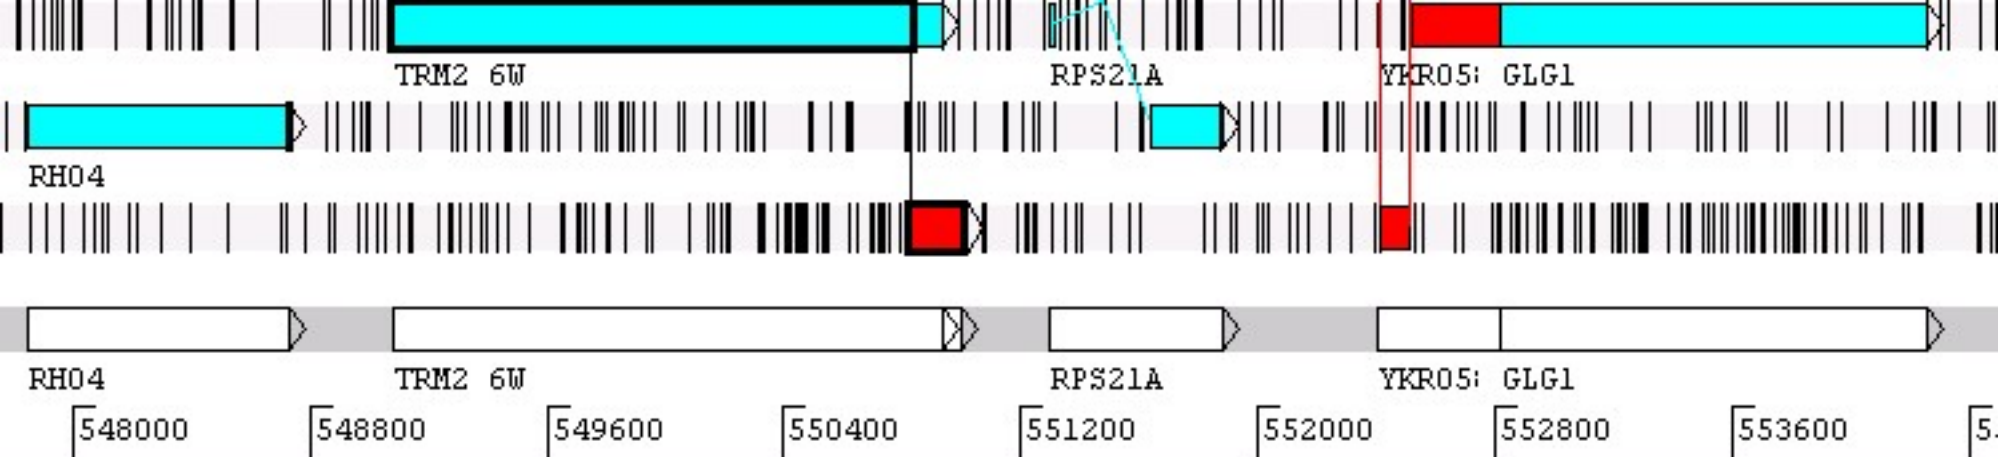

YKR095WX

YKR096W

YKR095WX

YKR096W

621600

622400

623200

624000

624800

625600

626400

627200

628000

628800

629600

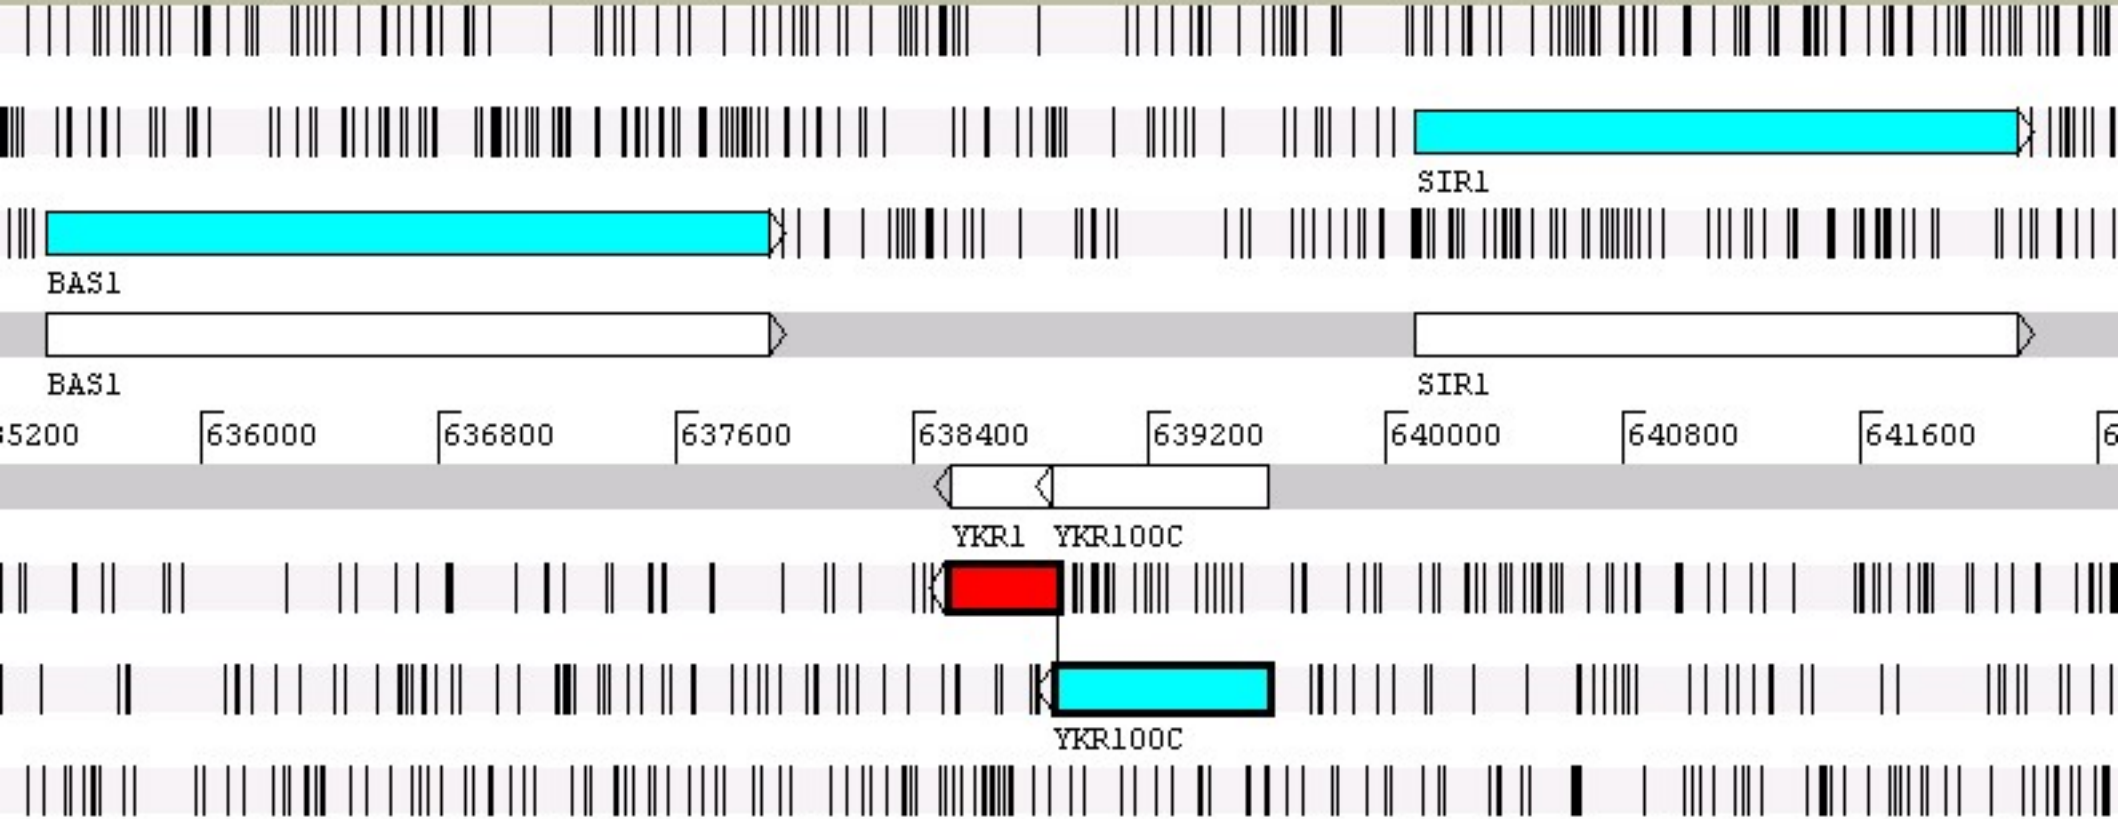

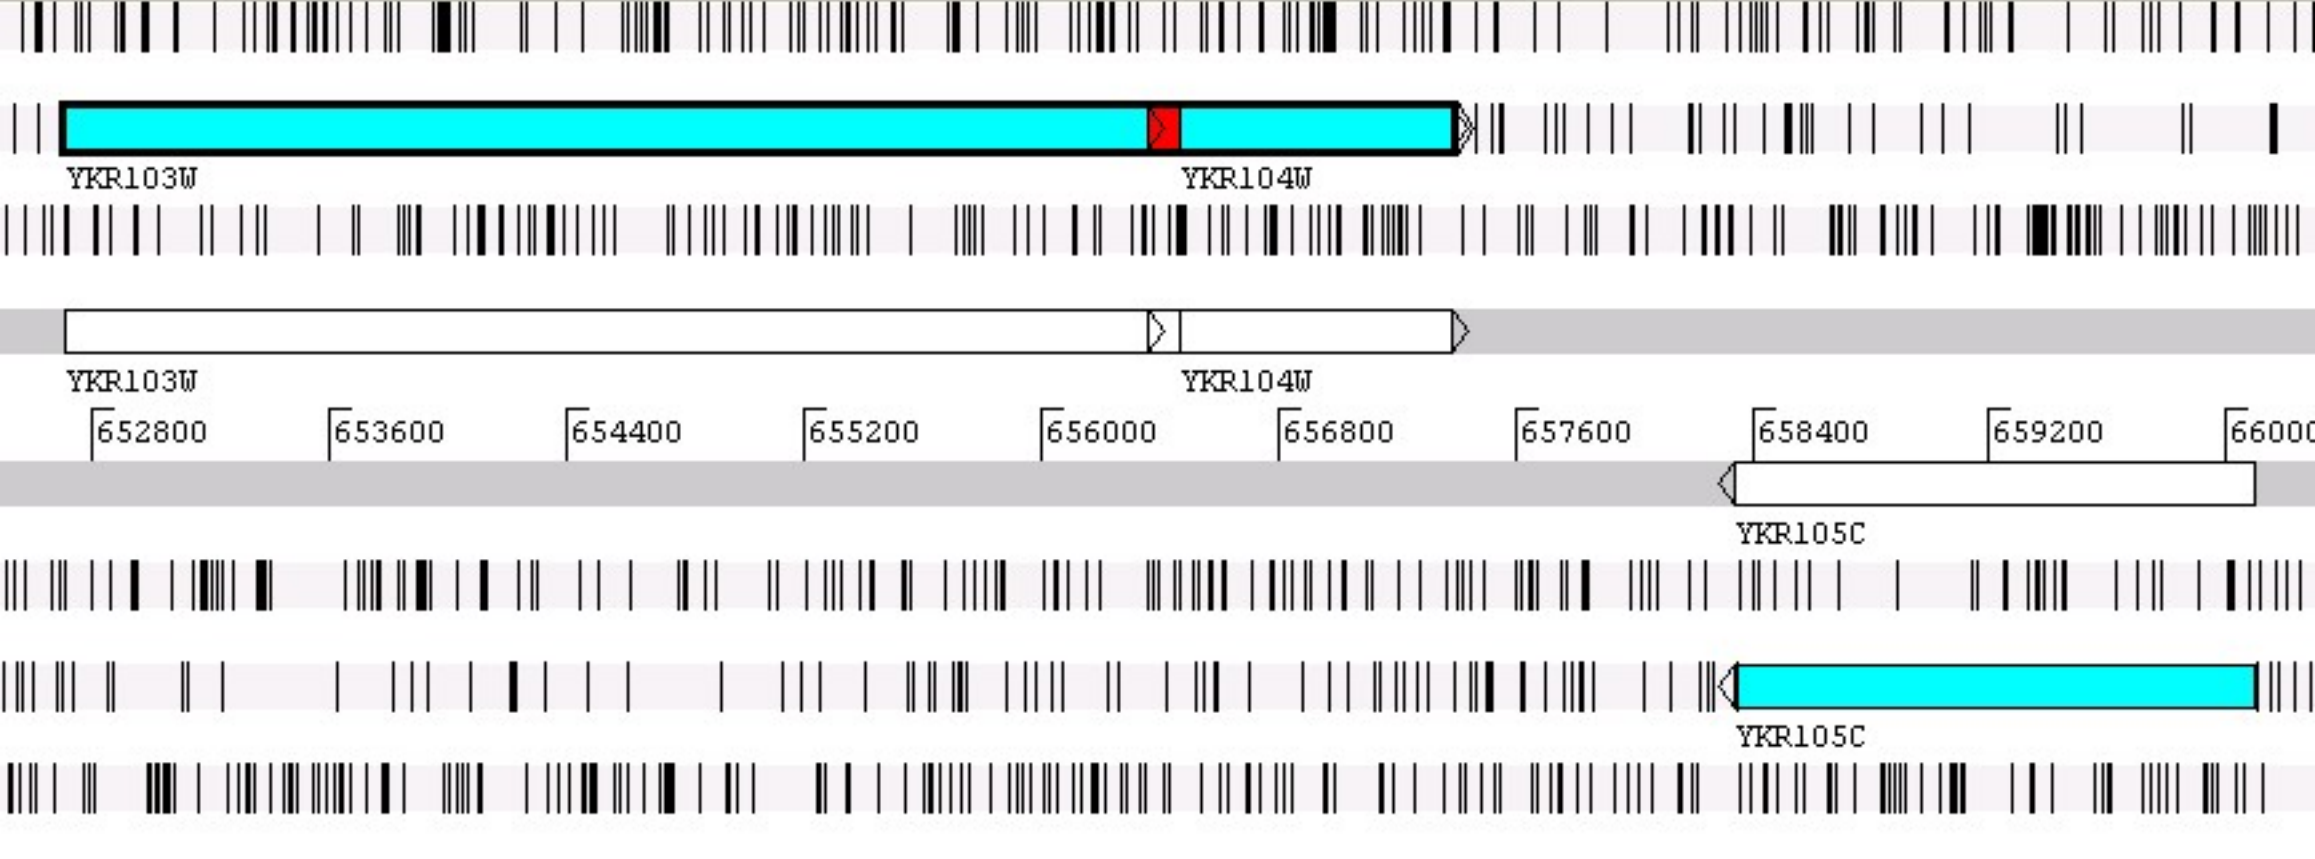

YKR103W

YKR104W

YKR103W

YKR104W

652800

653600

654400

655200

656000

656800

657600

658400

659200

660000

YKR105C

YKR105C



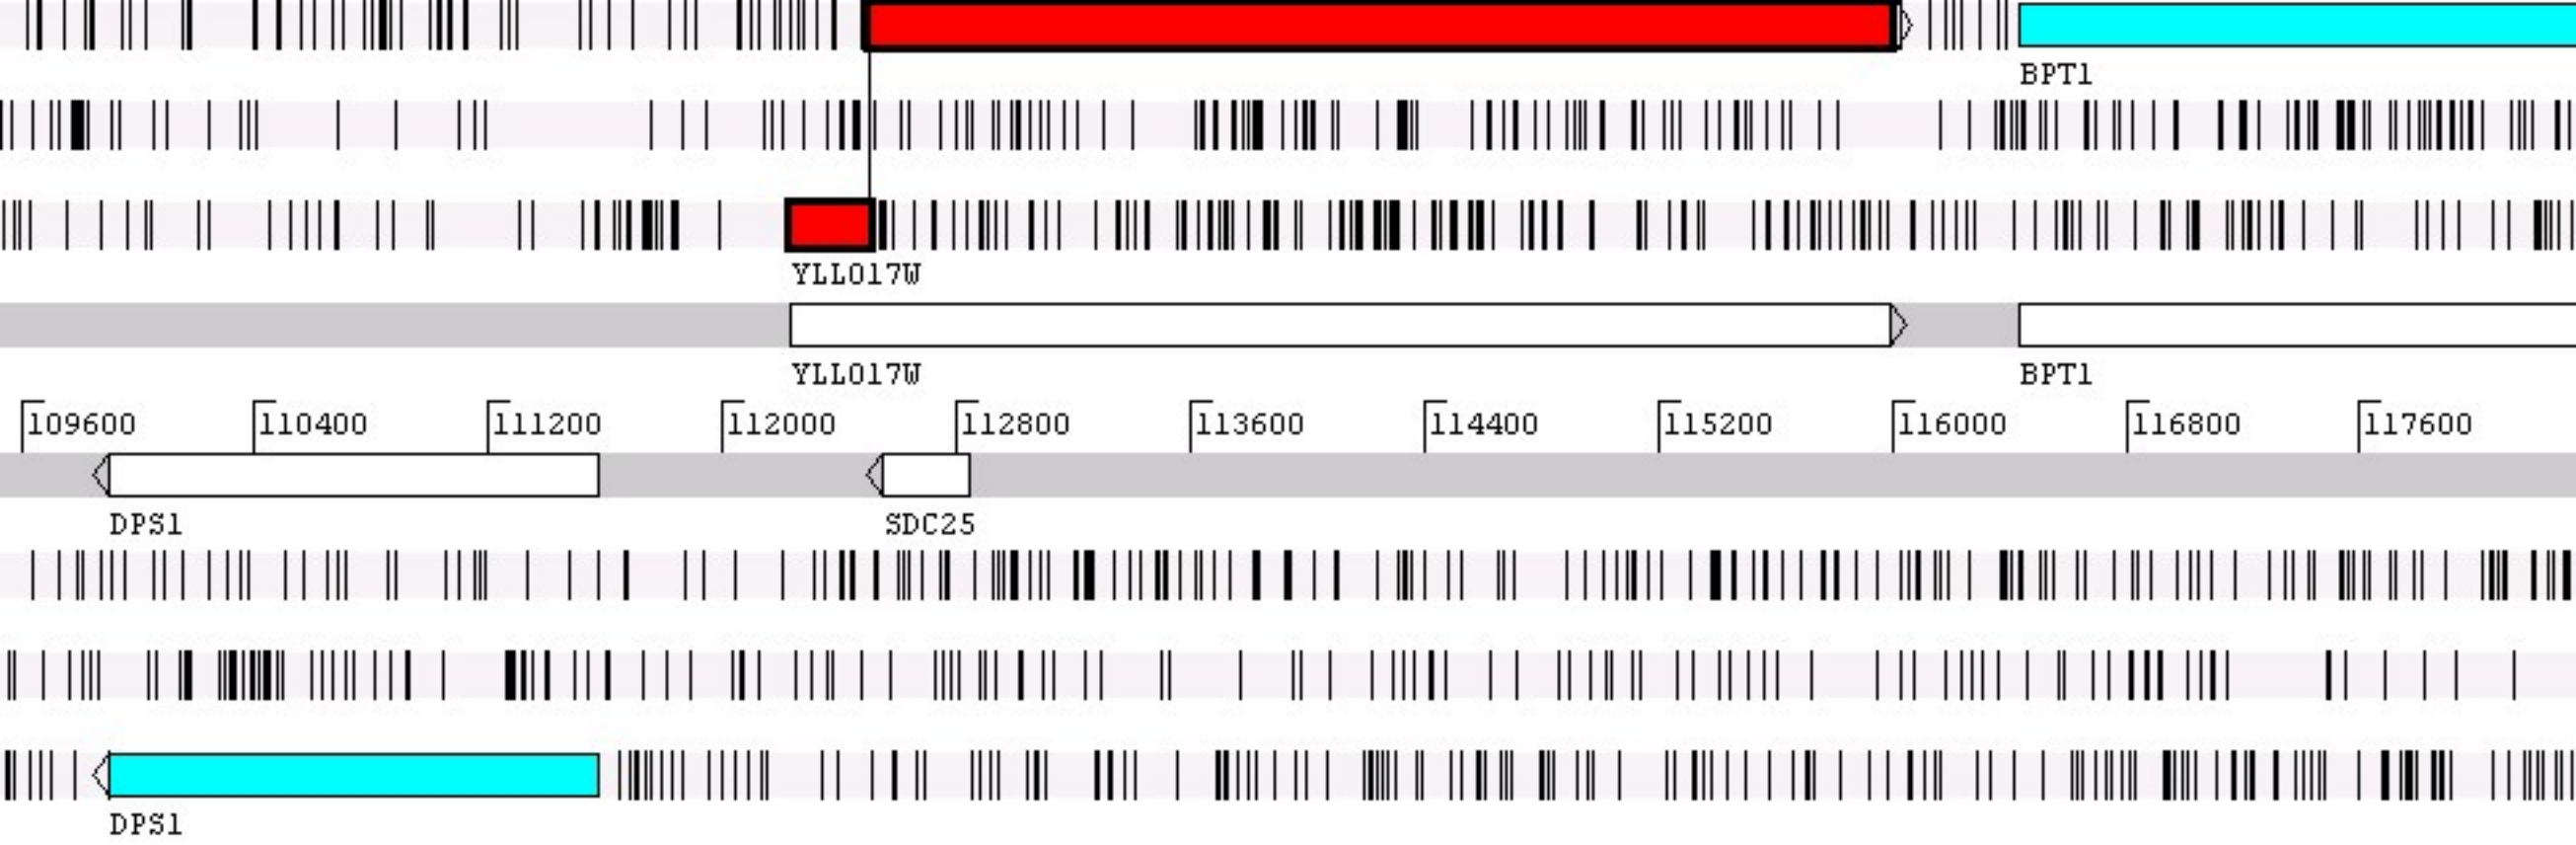

BPT1

YLL017W

YLL017W

BPT1

109600

110400

111200

112000

112800

113600

114400

115200

116000

116800

117600

DPS1

SDC25

DPS1

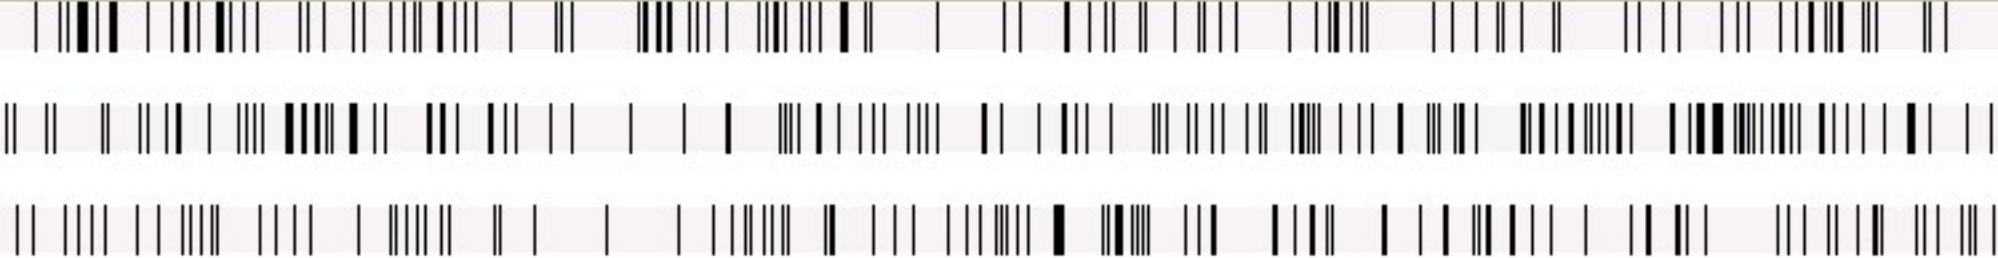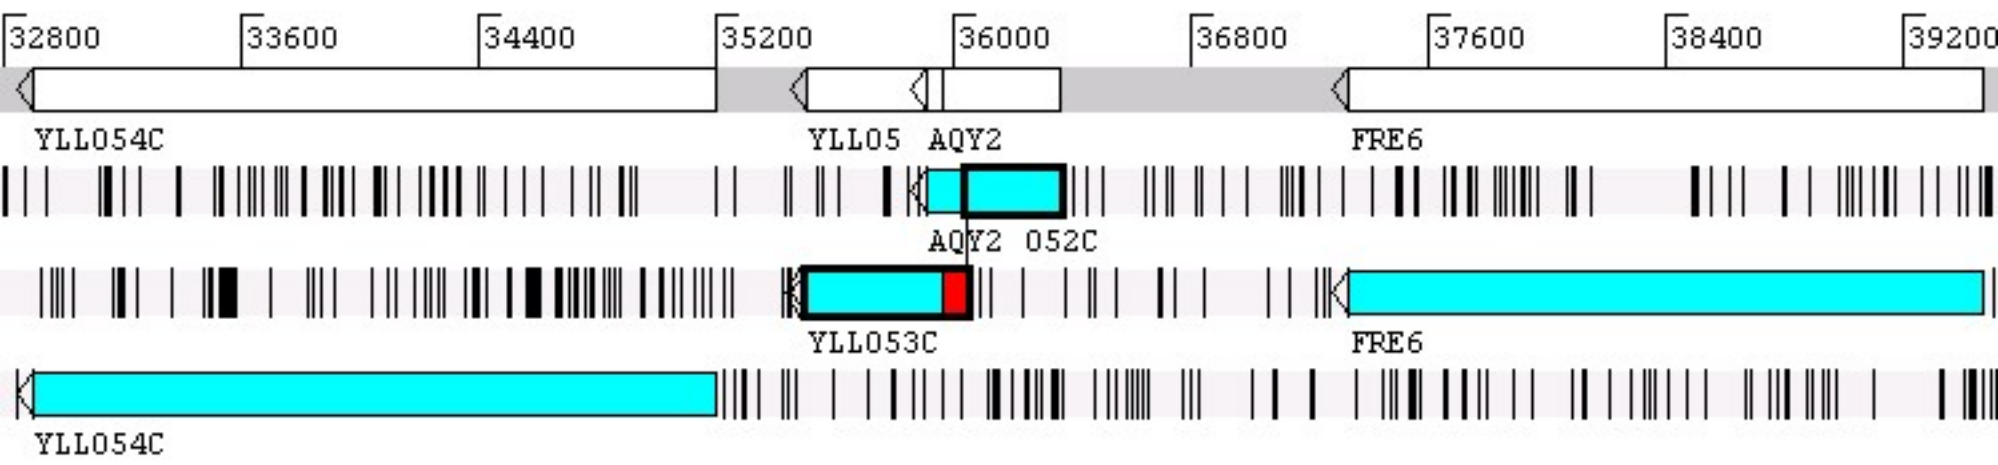

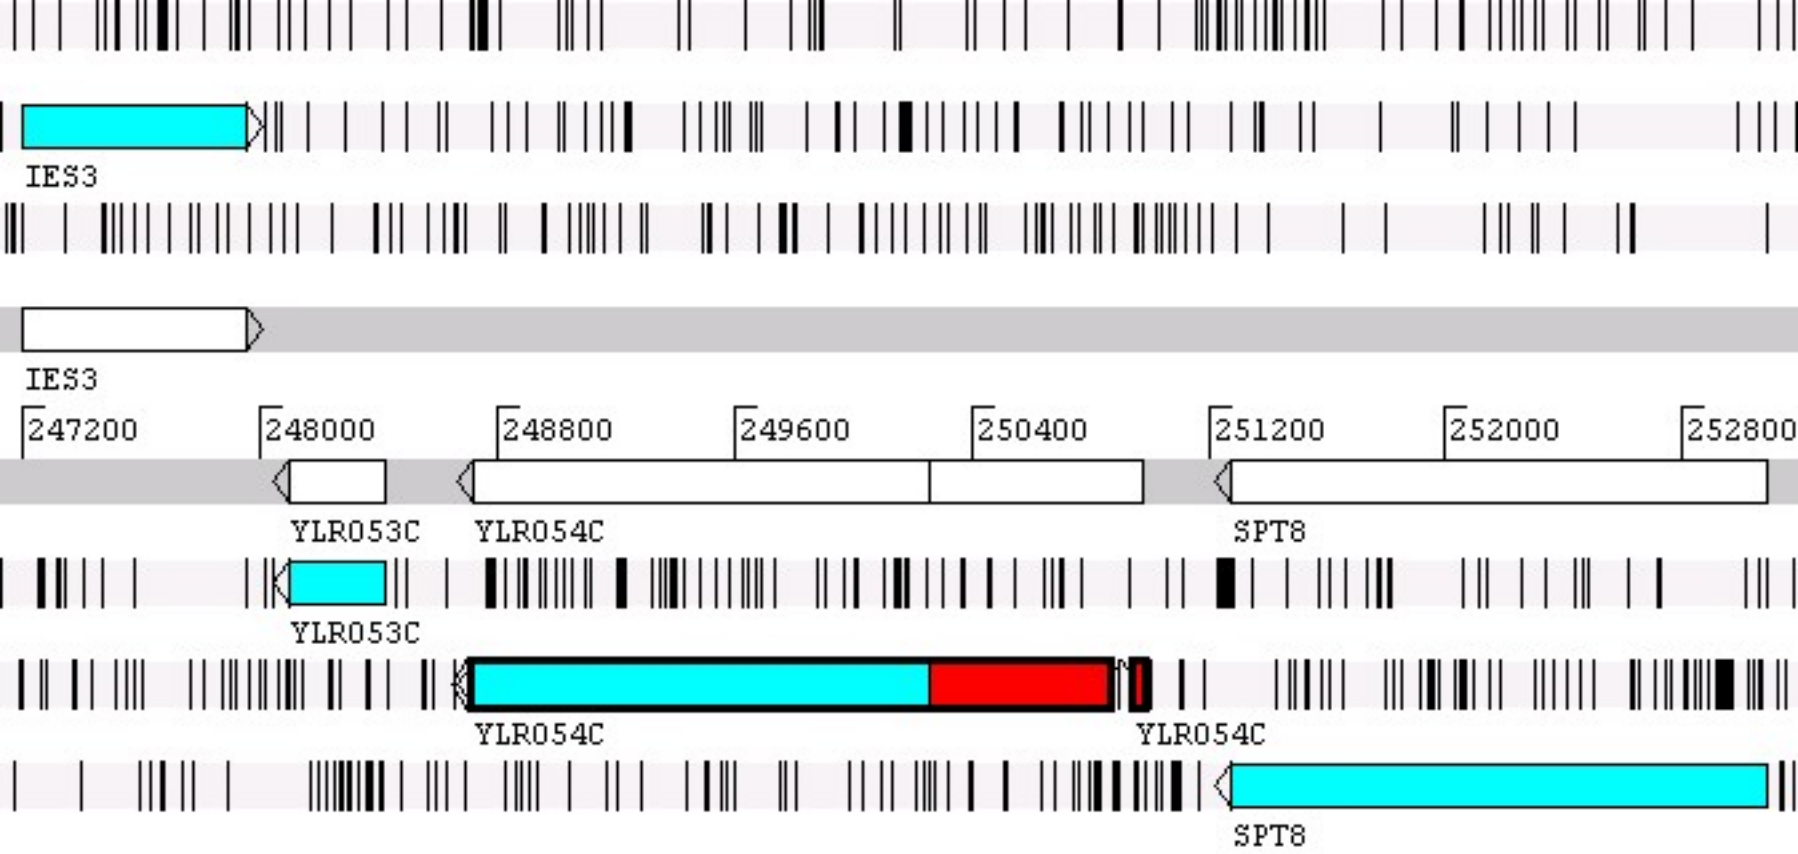

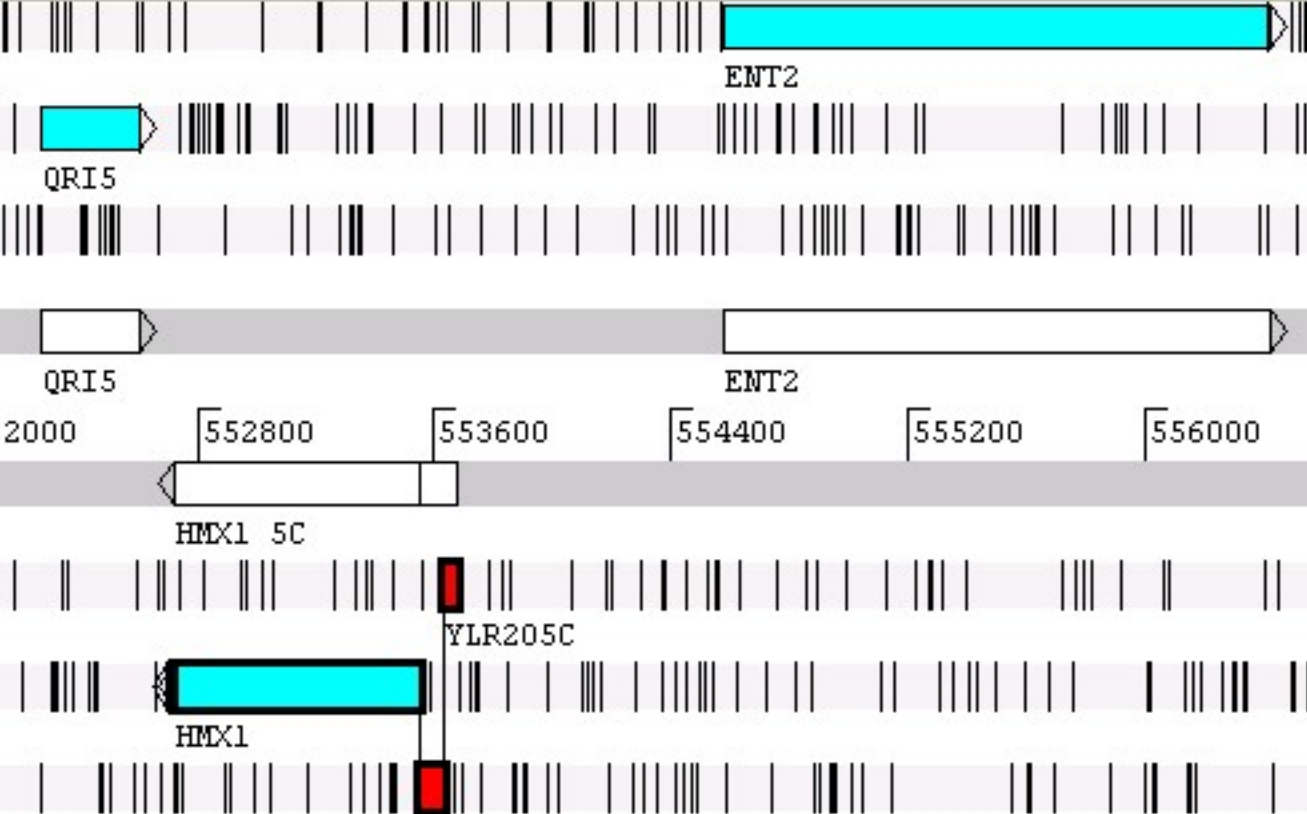

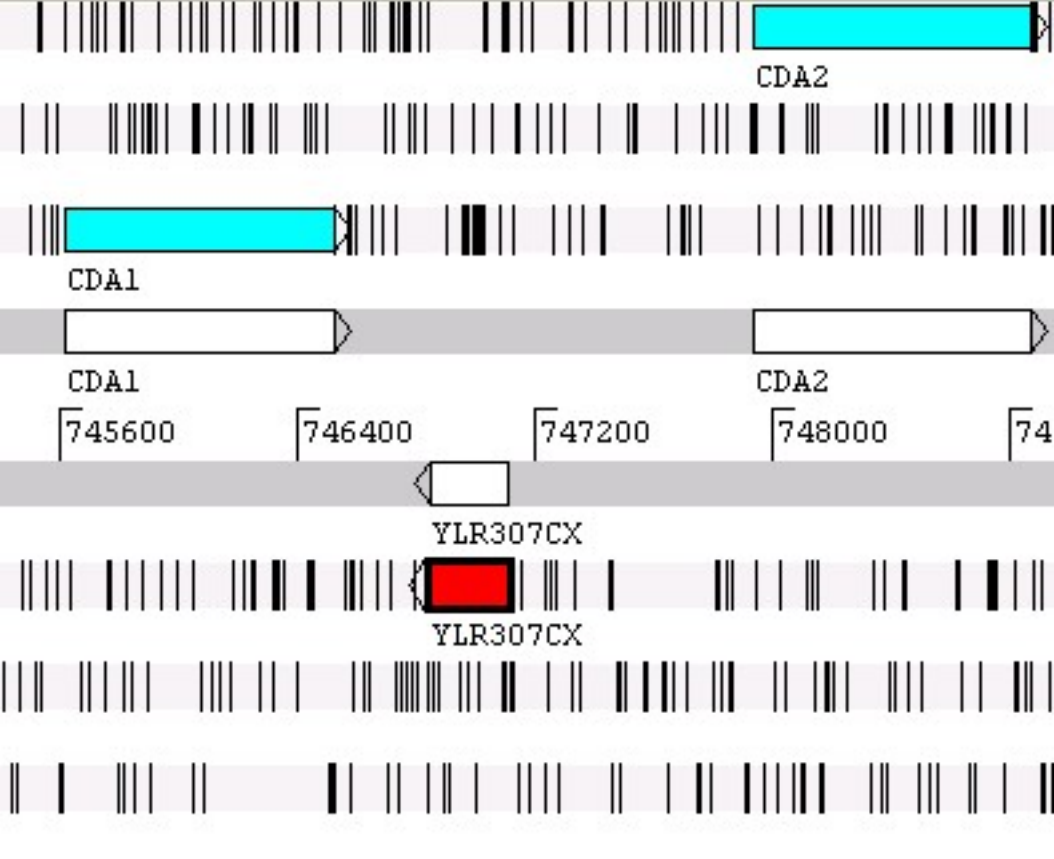



RPS29A

The image shows a genomic map of the RPS29A and ECM19 region. The top track shows the RPS29A gene structure with a cyan arrow pointing right. The second track shows the ECM19 gene structure with a cyan arrow pointing right. The third track shows the RPS29A lncRNA gene structure with a white arrow pointing right. The fourth track shows the ECM19 gene structure with a white arrow pointing right. The fifth track shows the STE23 gene structure with a white arrow pointing left. The sixth track shows the STE23 3C gene structure with a red arrow pointing left and a cyan arrow pointing right. The seventh track shows the STE23 3C gene structure with a cyan arrow pointing right. The genomic coordinates are marked at the bottom: 98400, 899200, 900000, 900800, 901600, 902400, and 903200.

ECM19

RPS29A lncRNA

ECM19

98400

899200

900000

900800

901600

902400

903200

STE23

STE23 3C

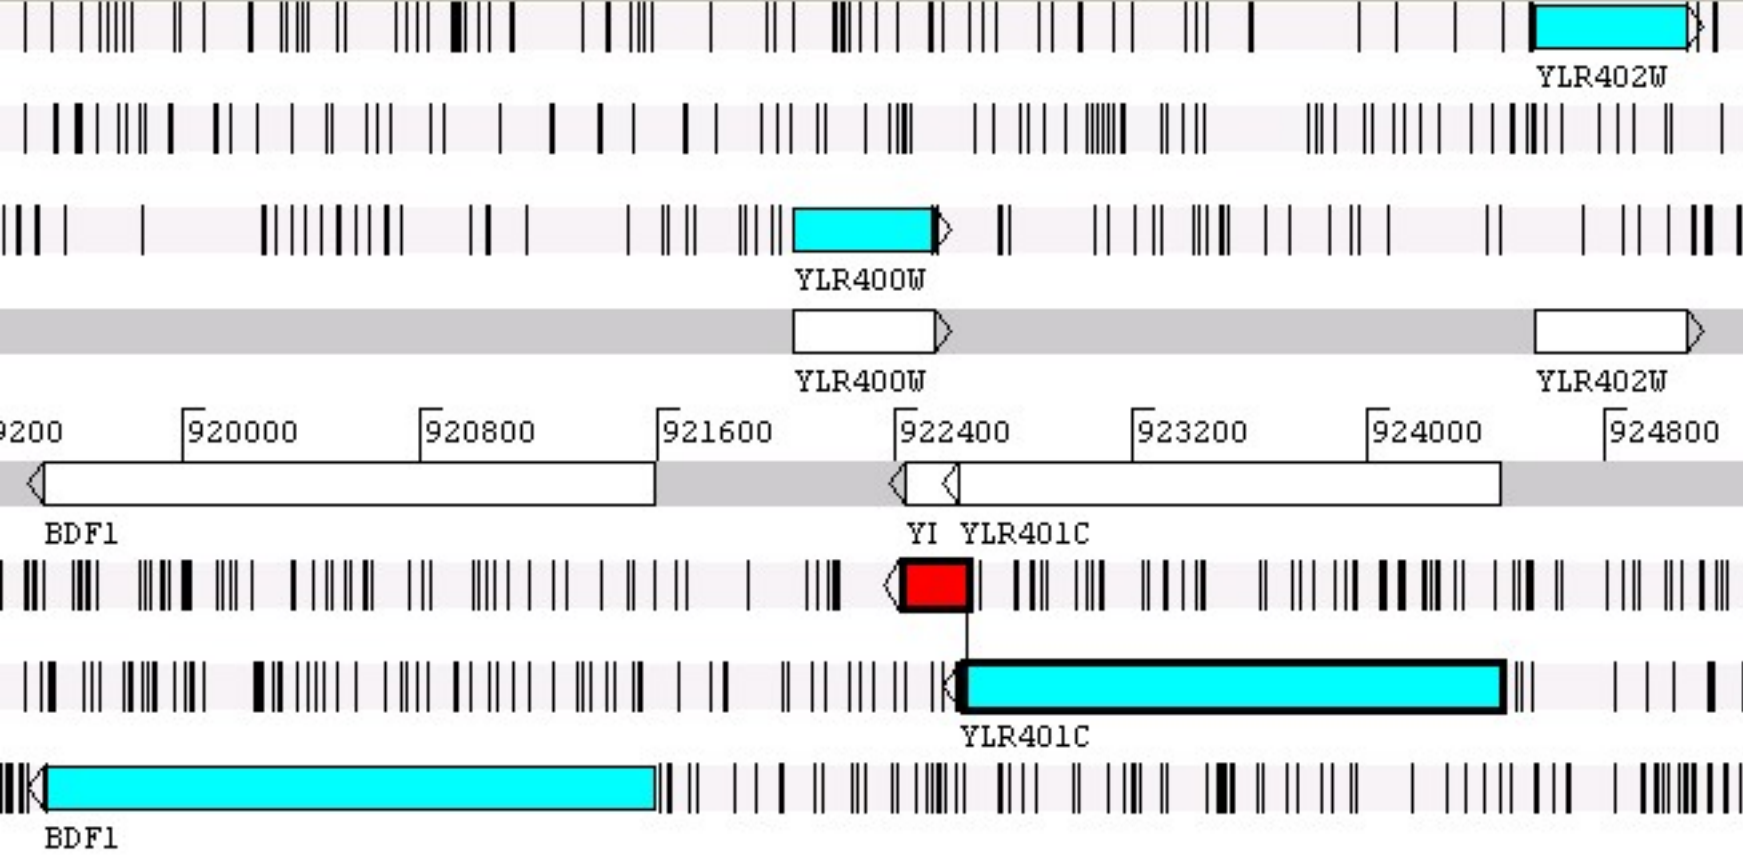

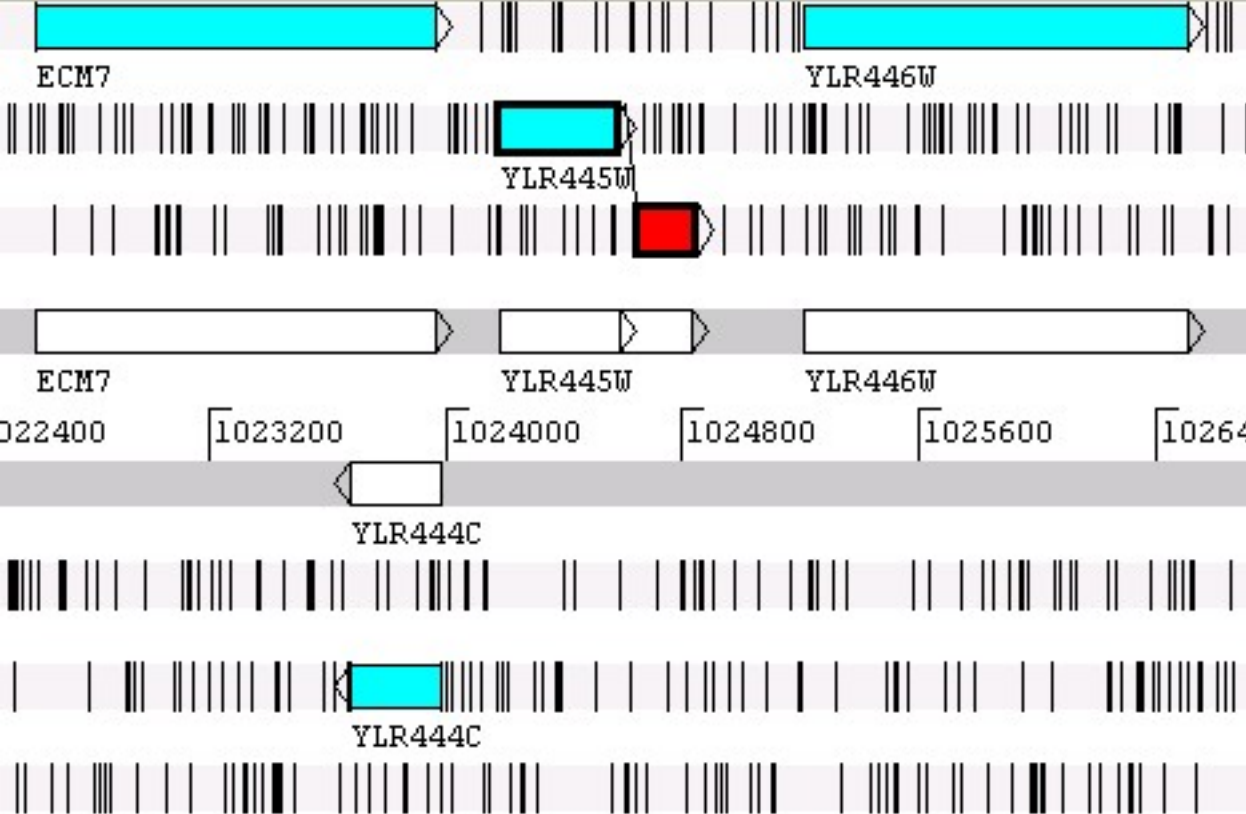



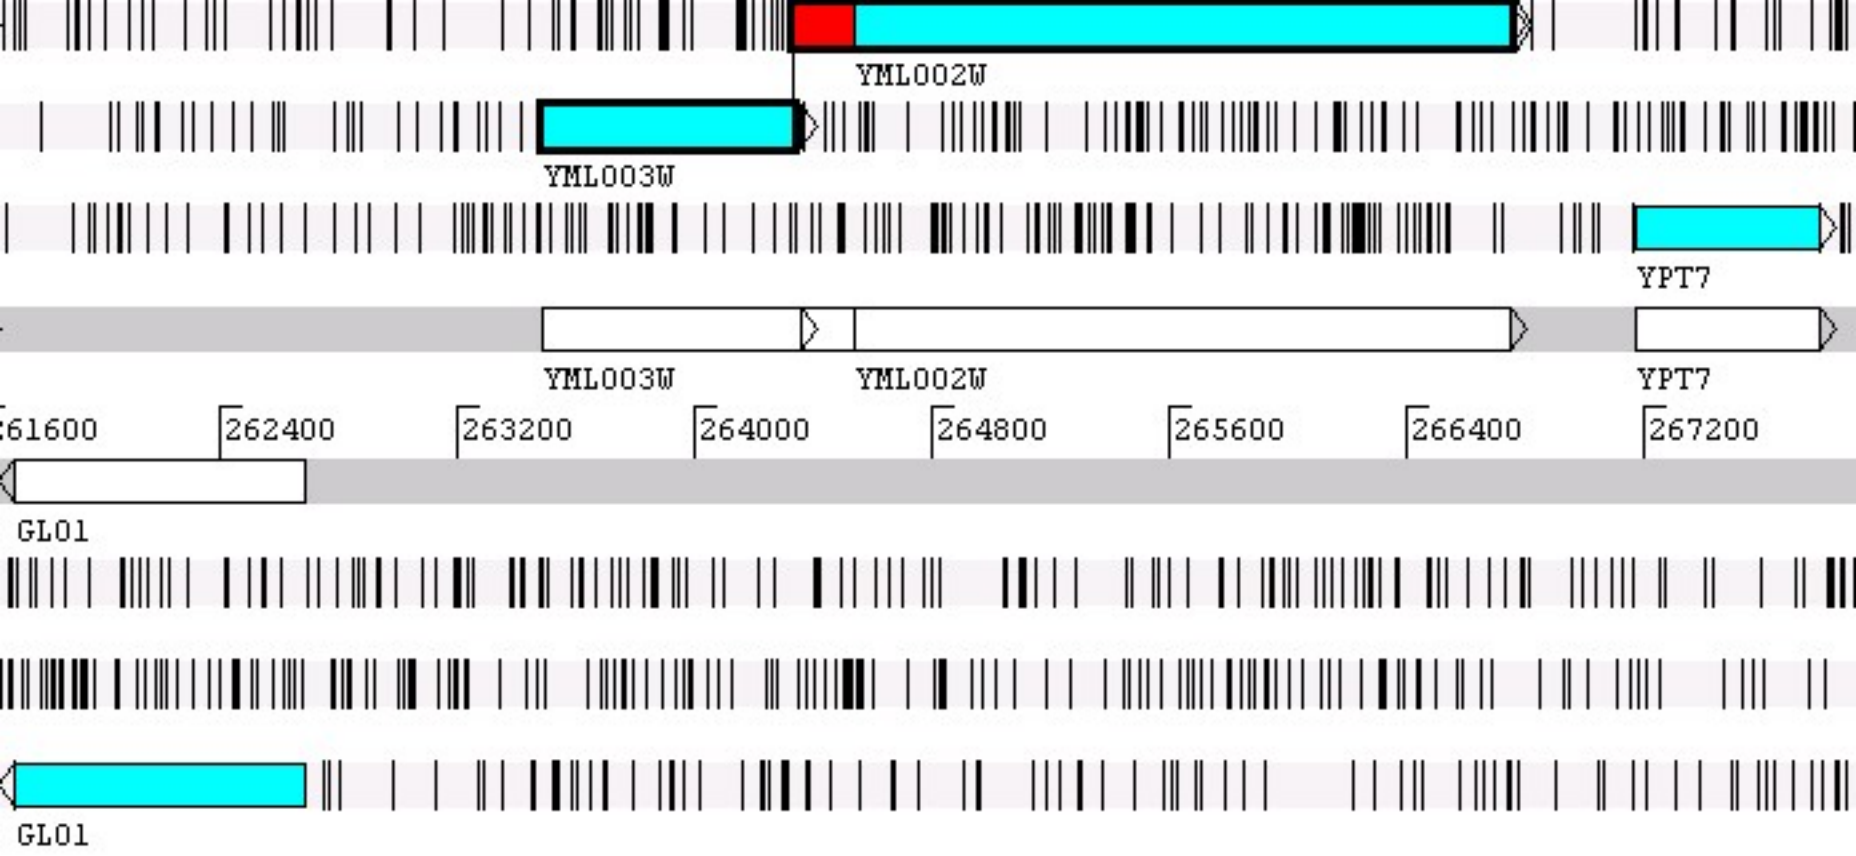

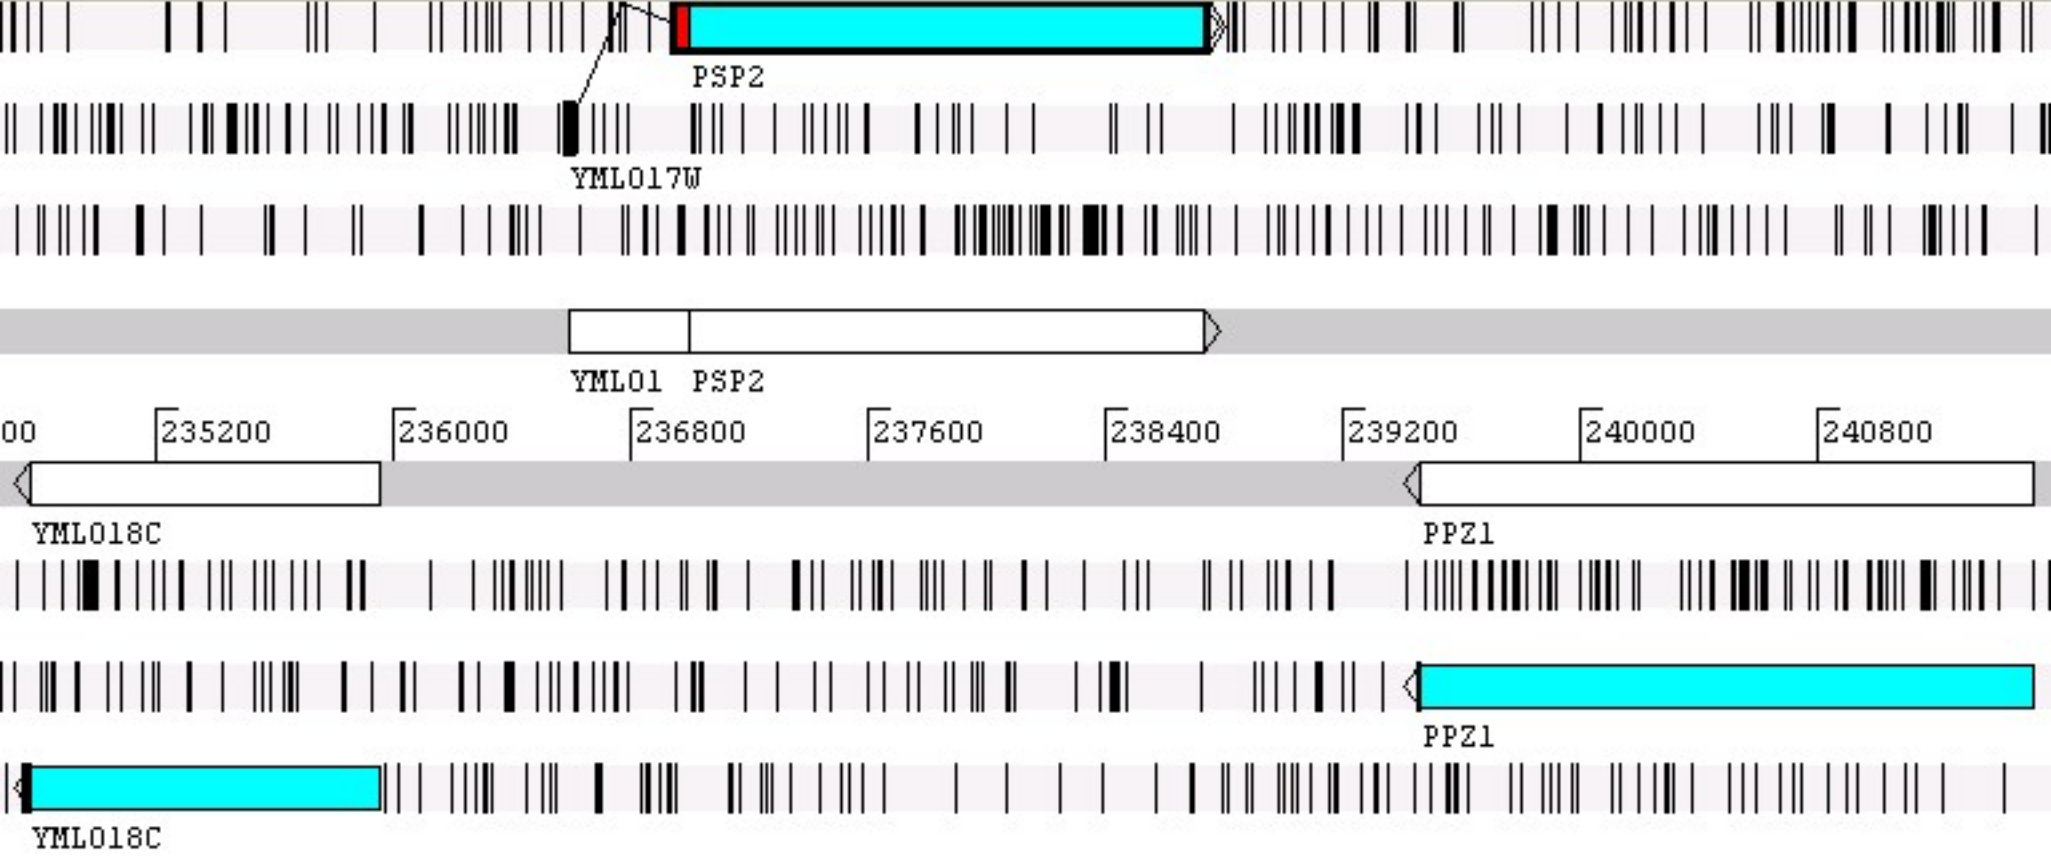

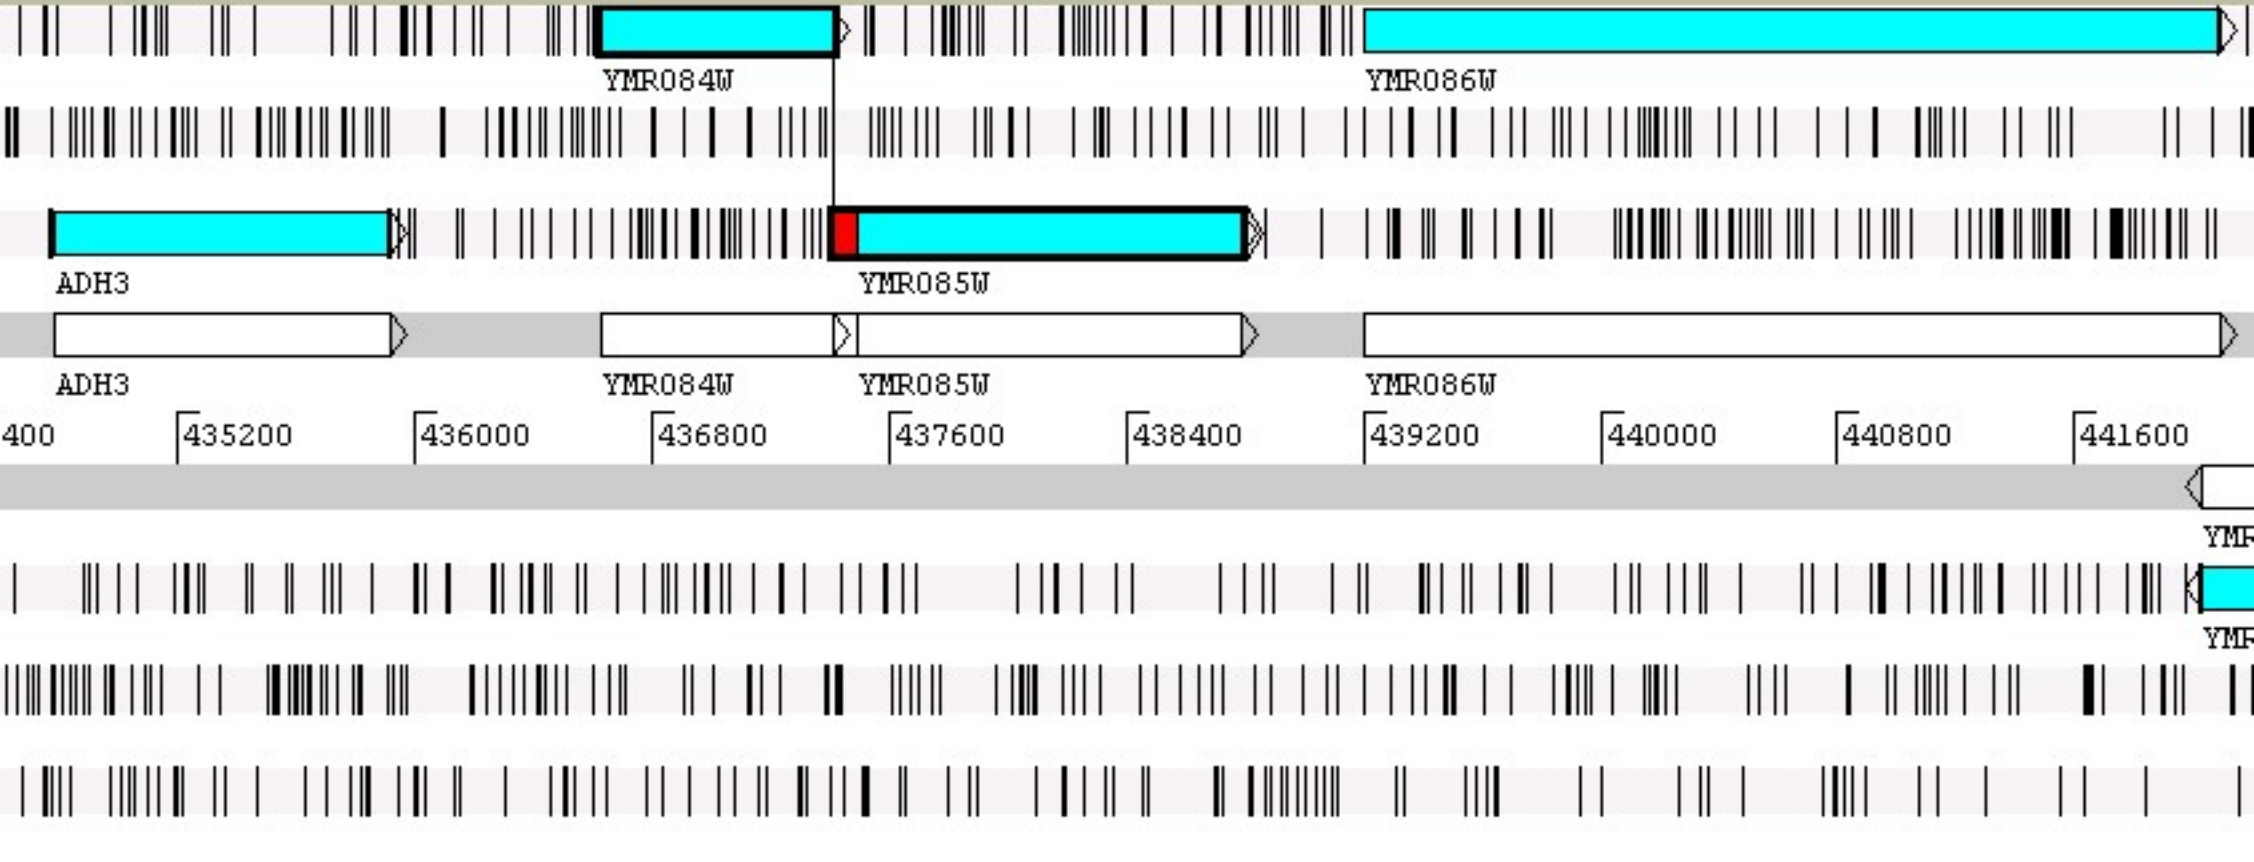

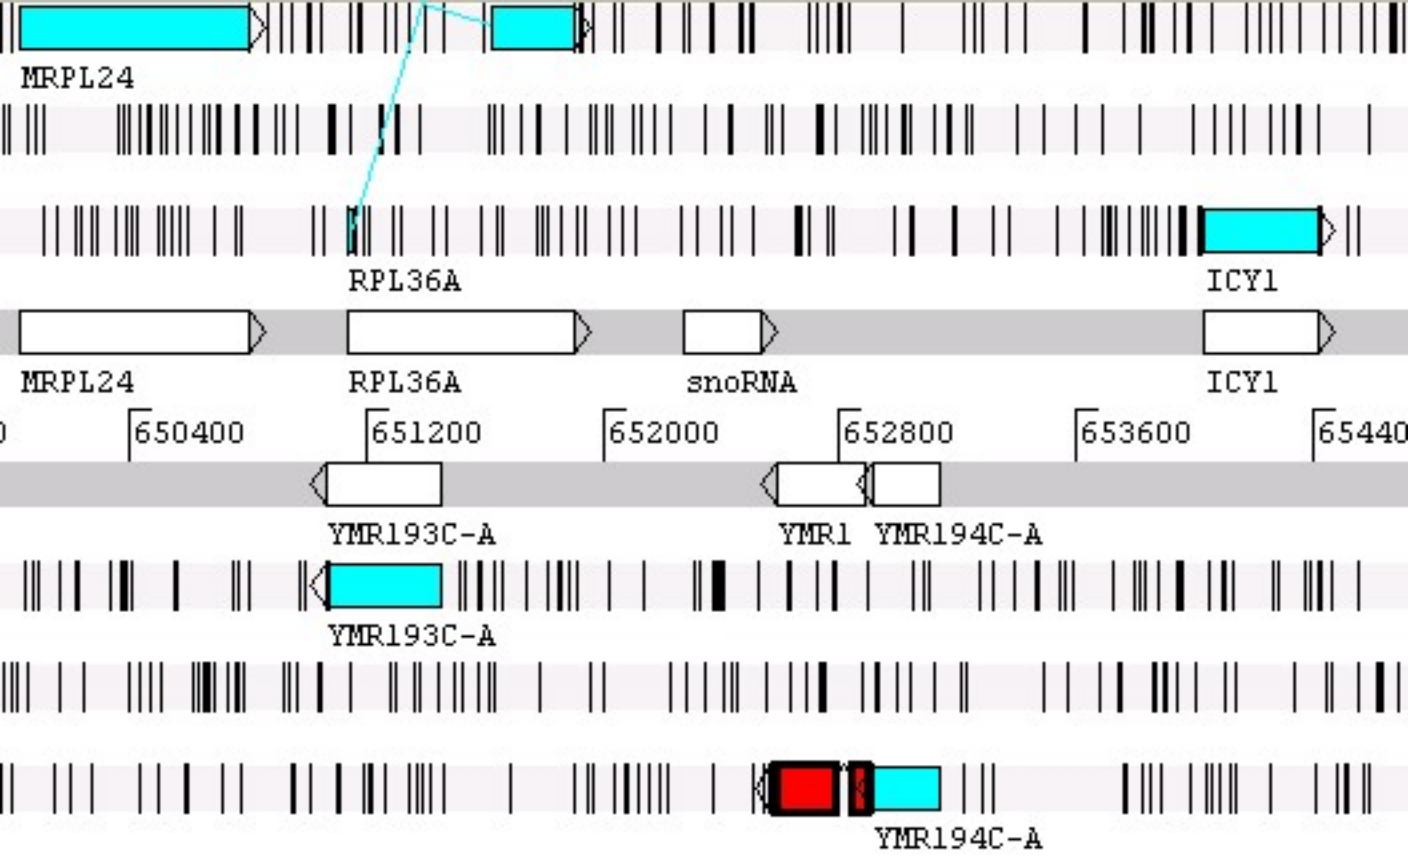

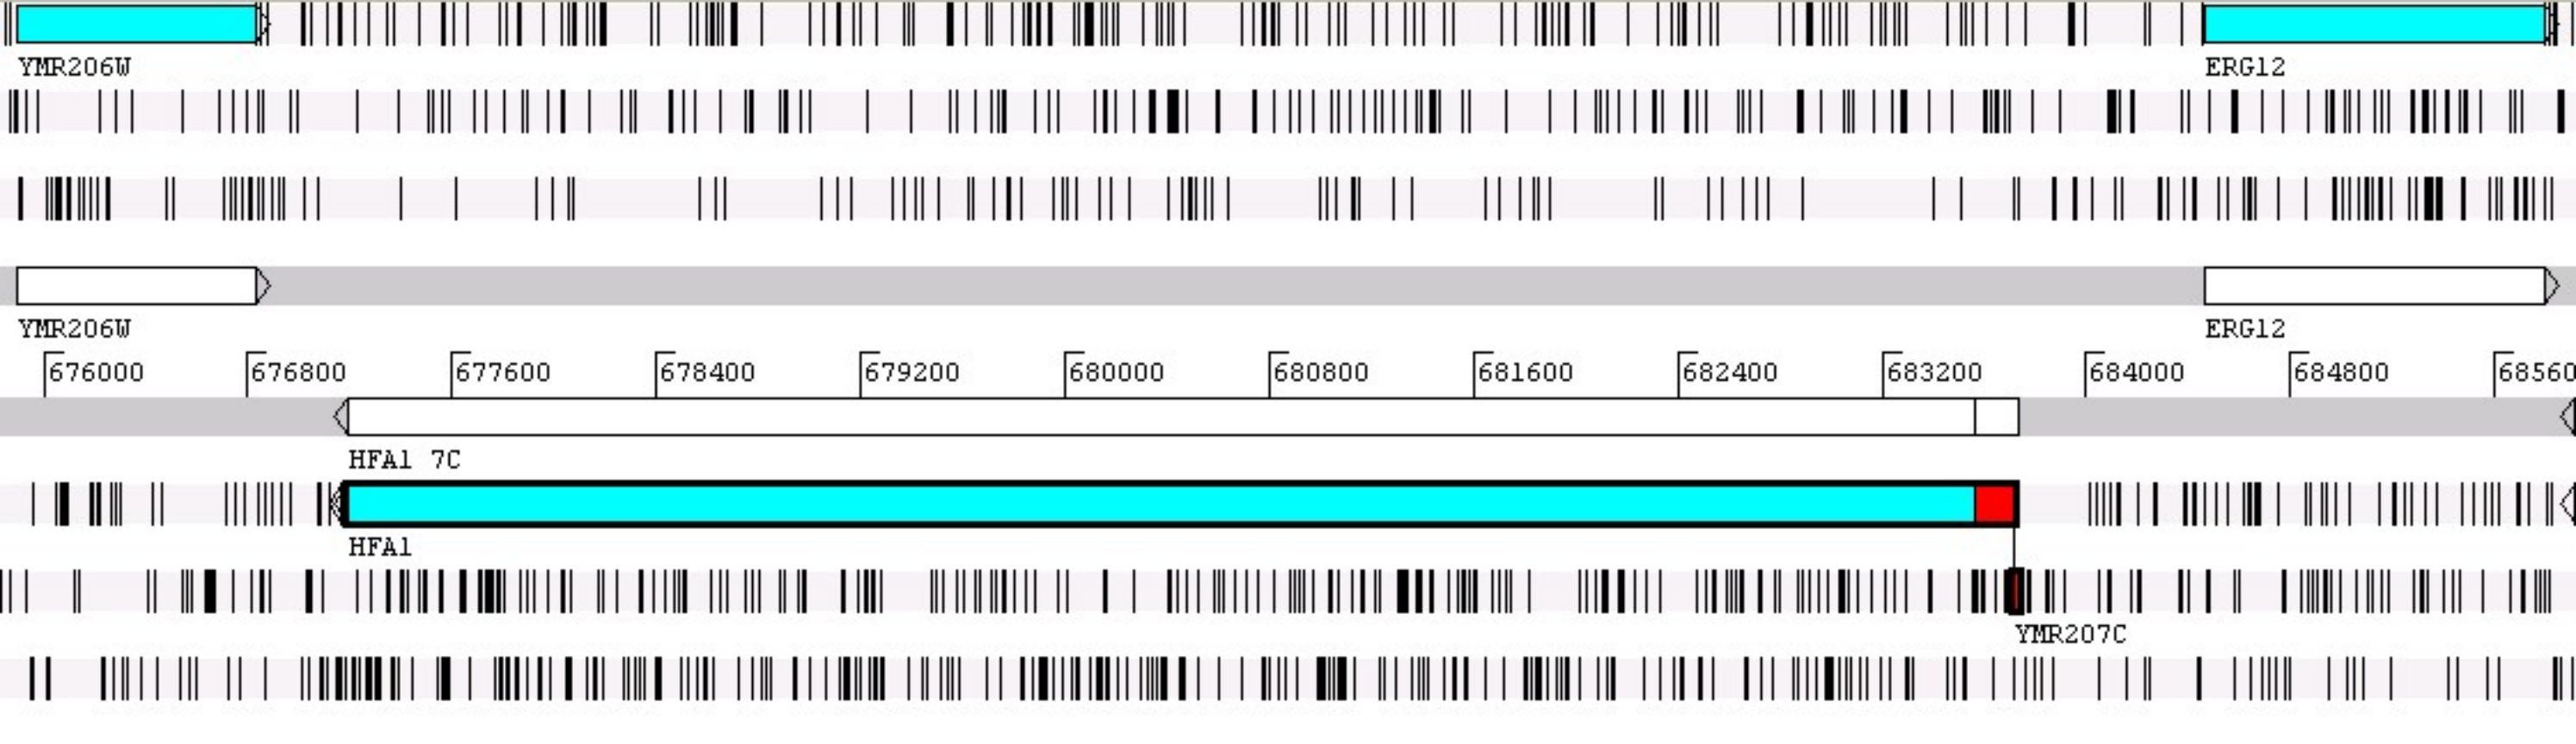

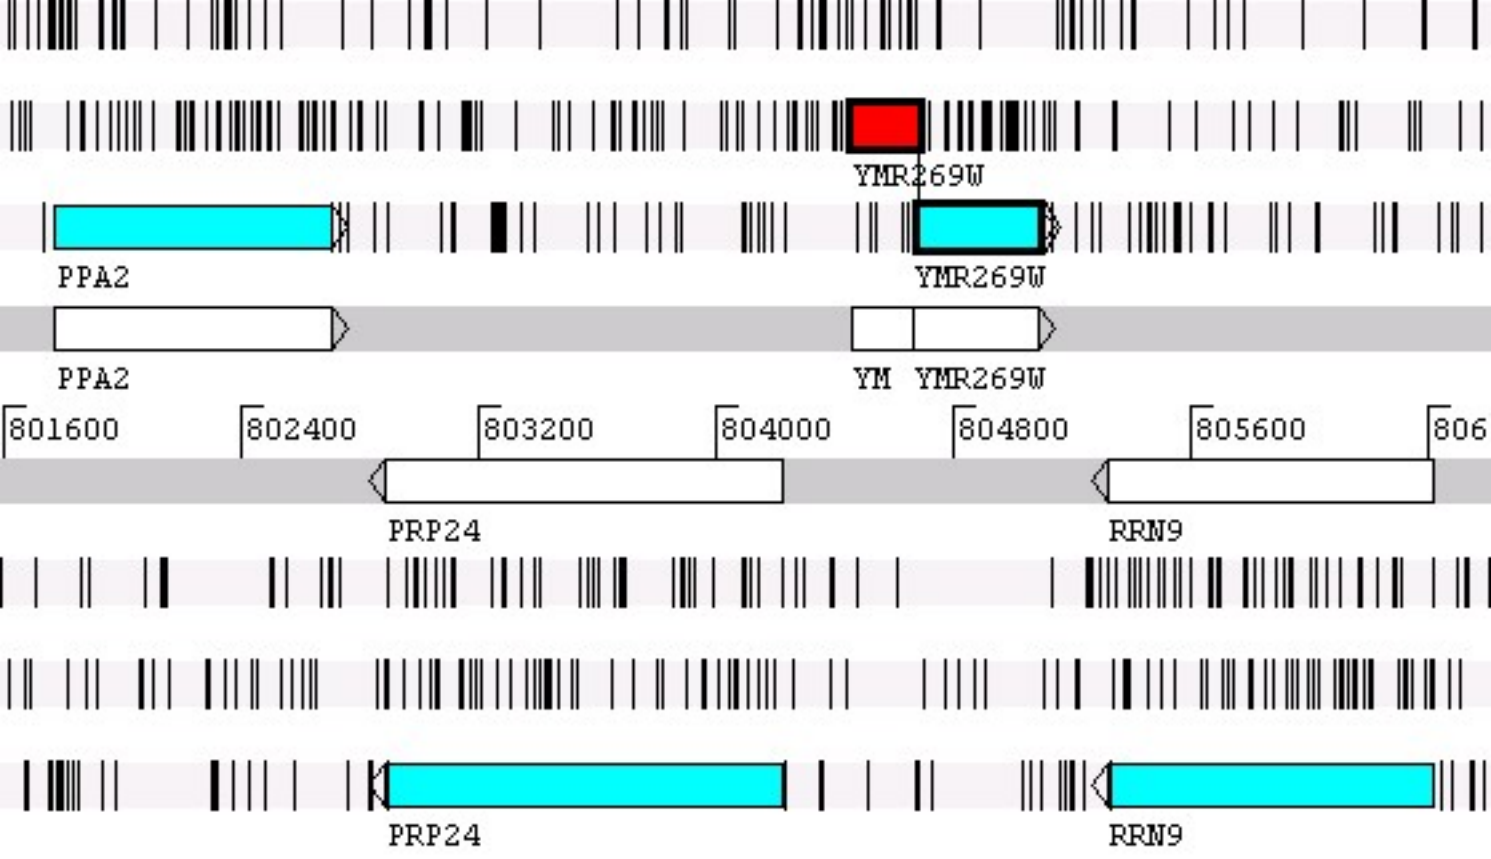

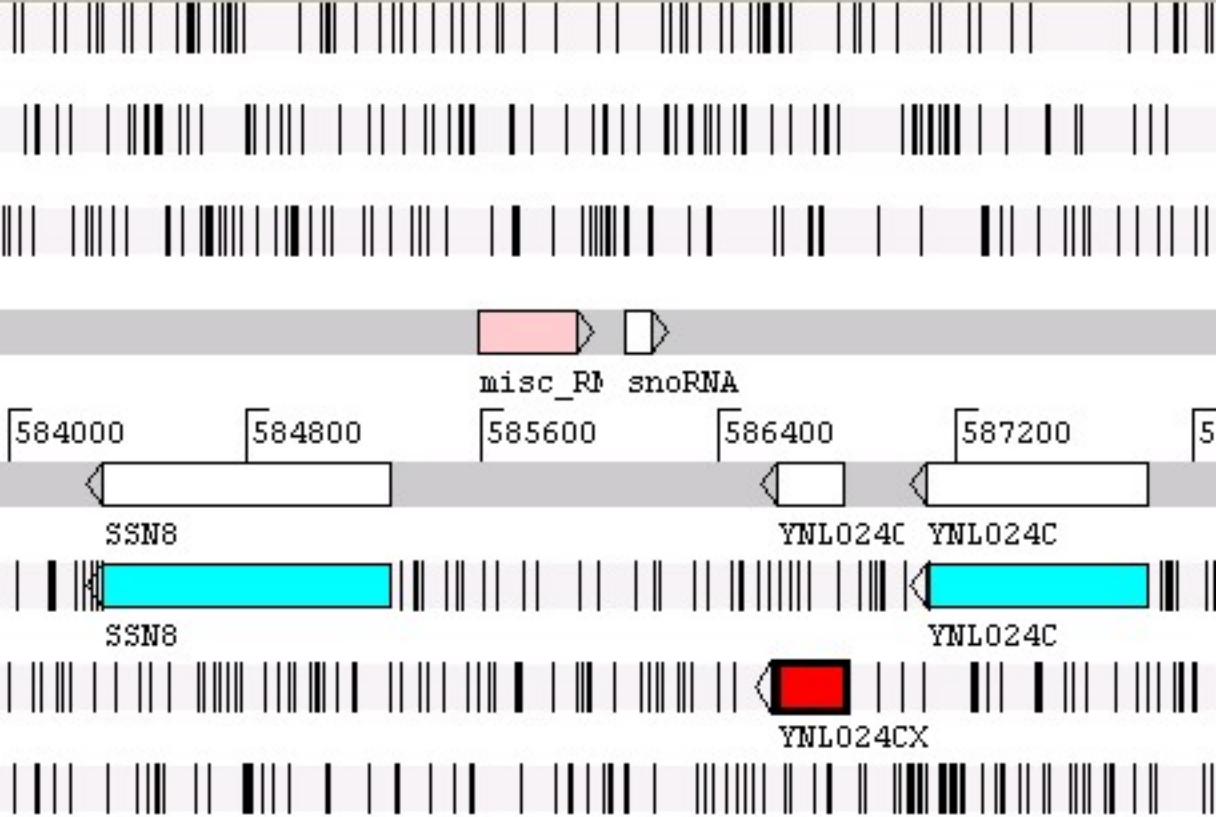

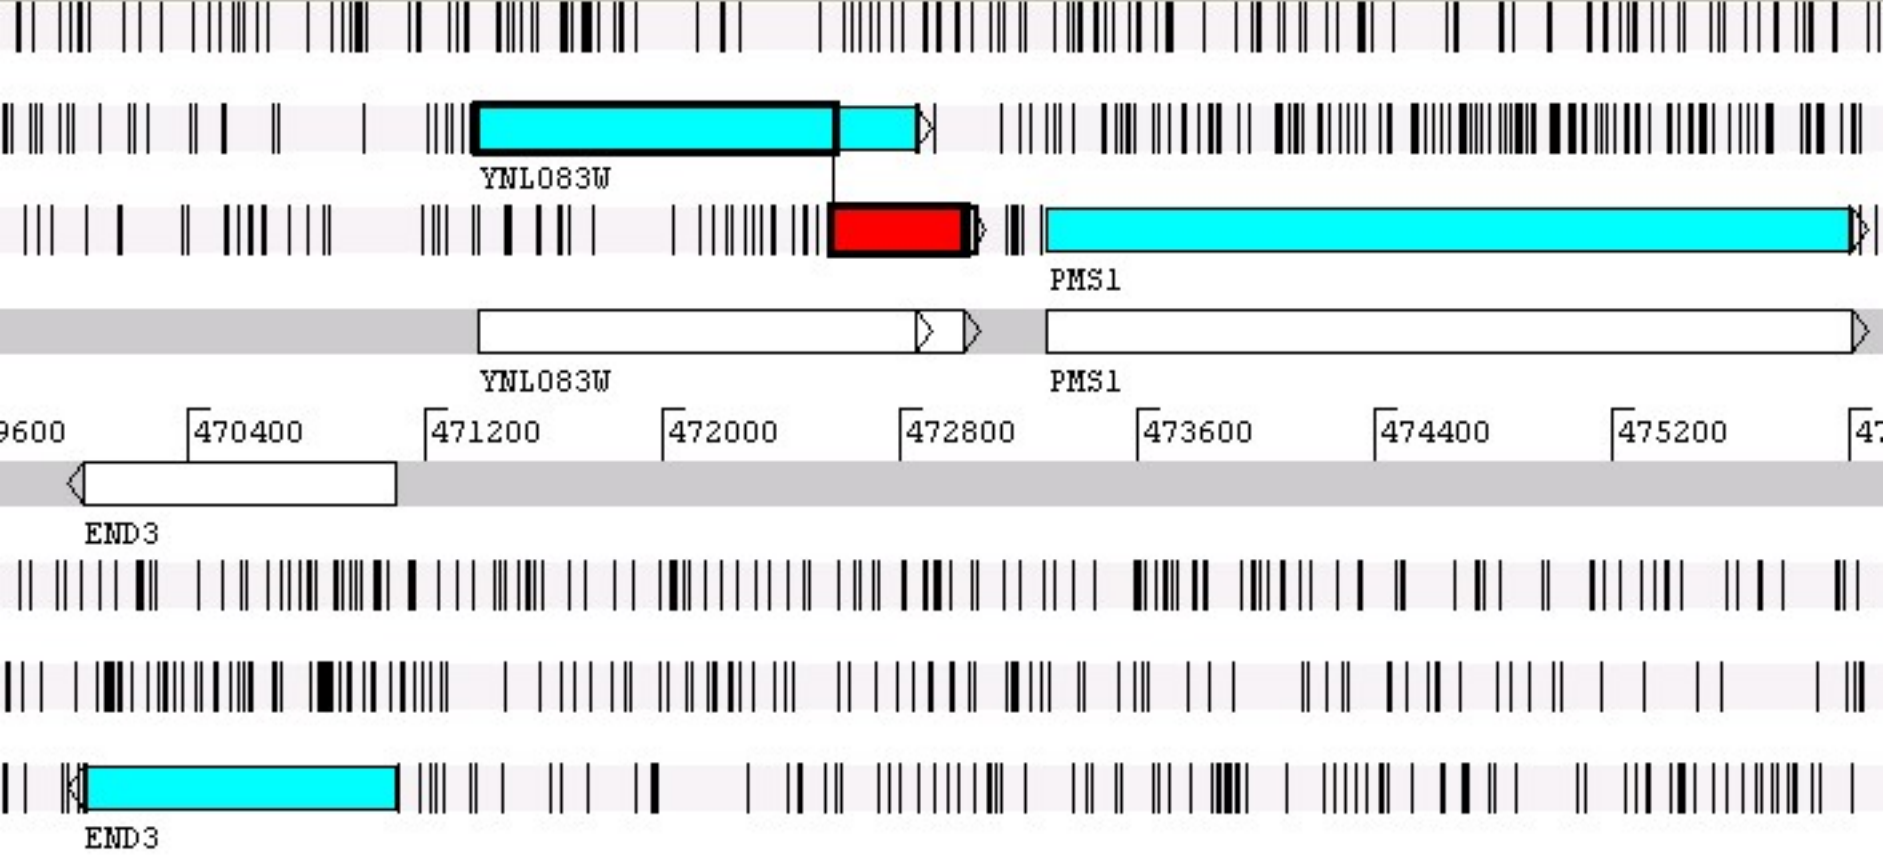



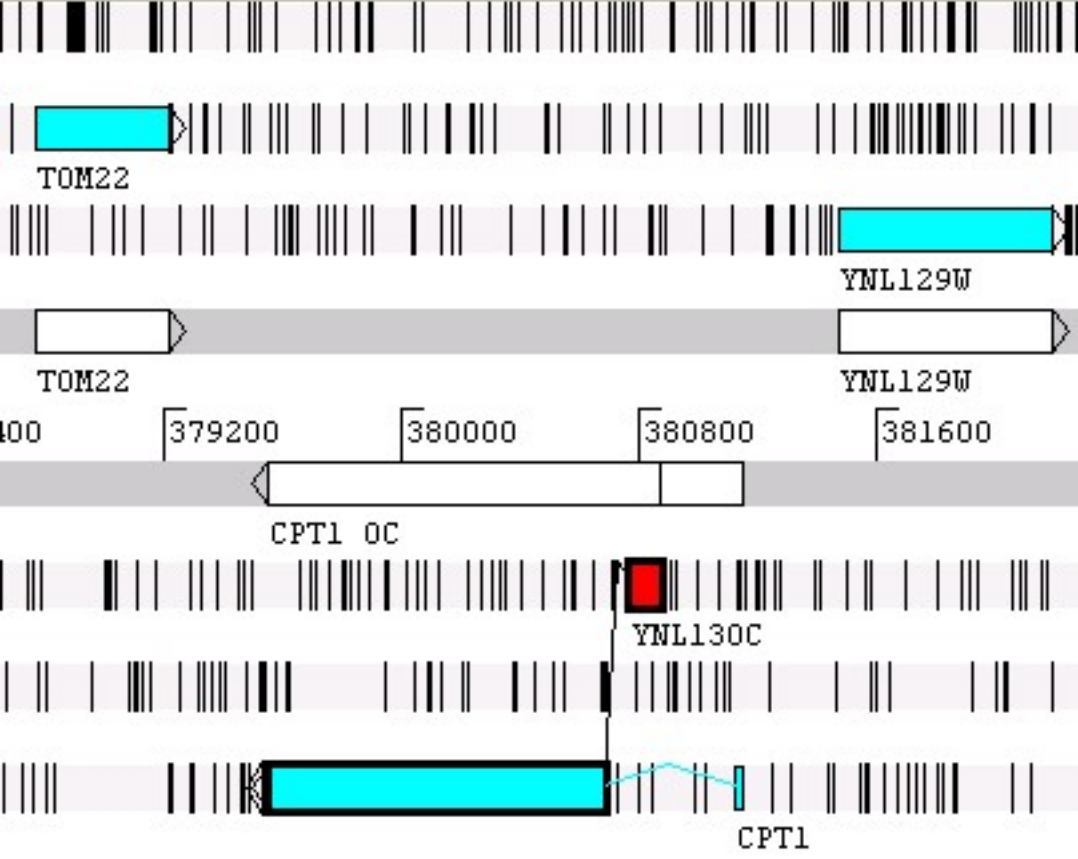

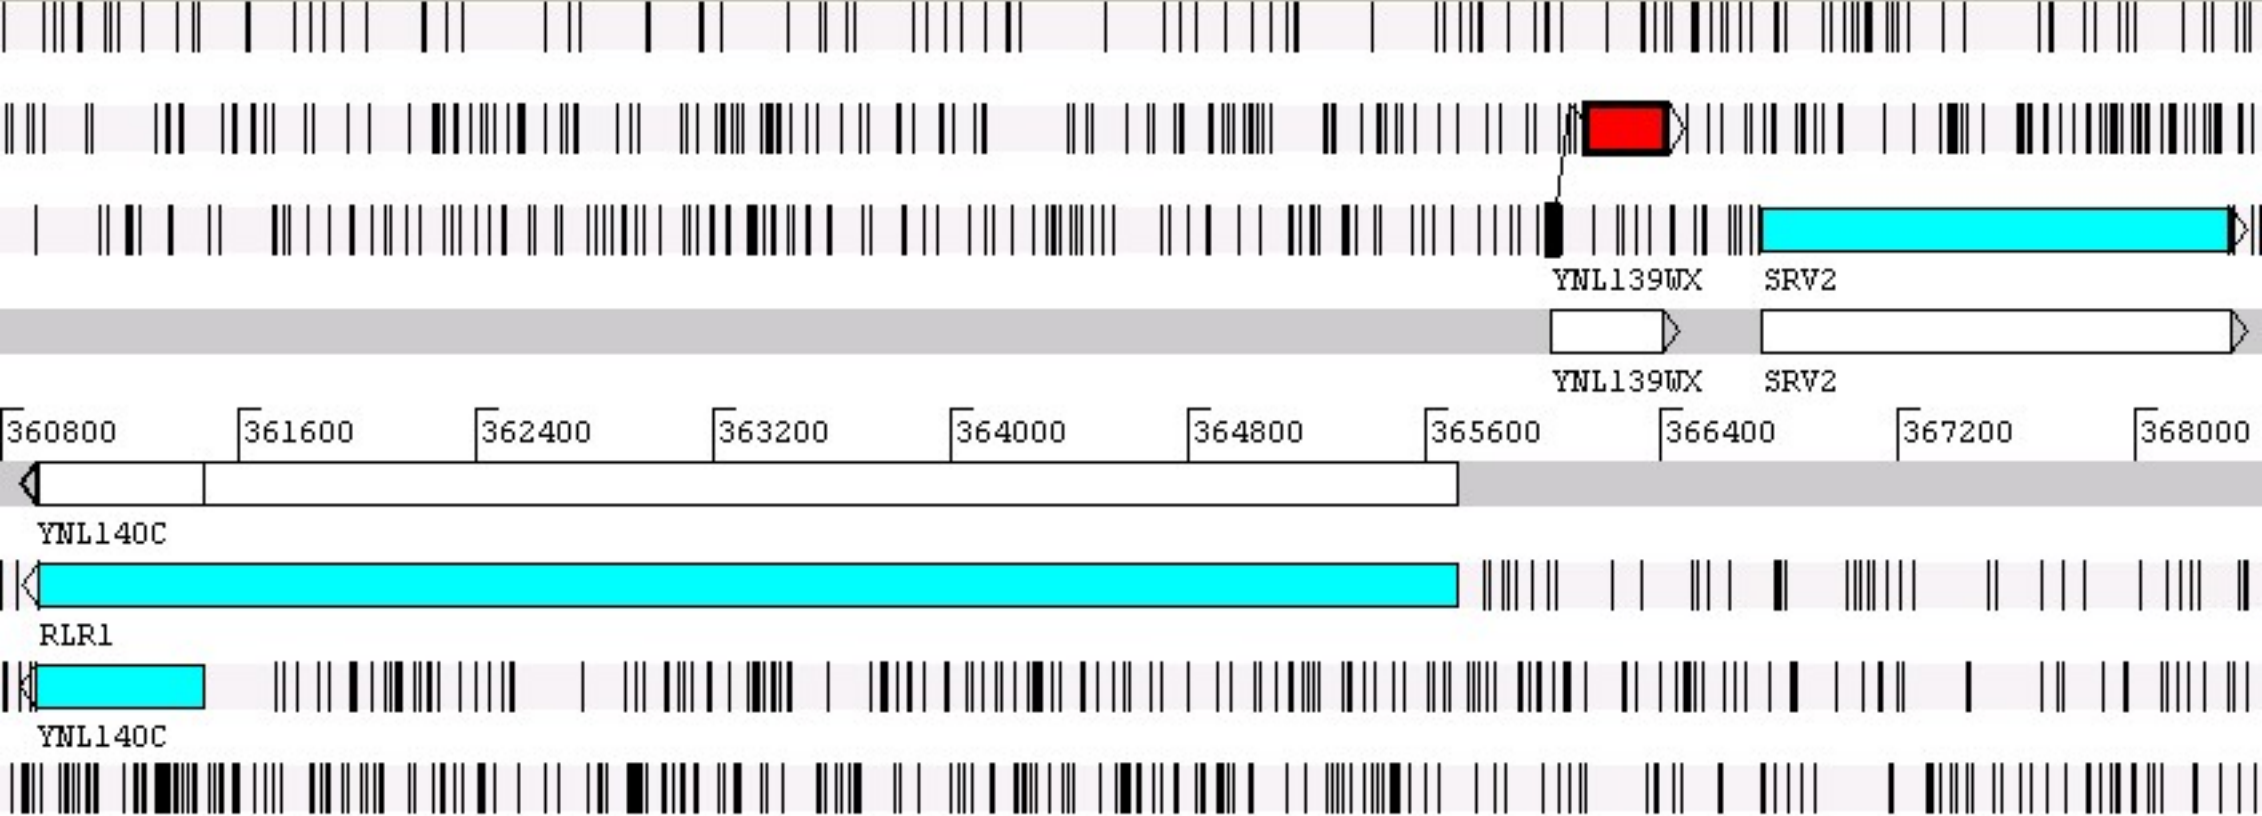

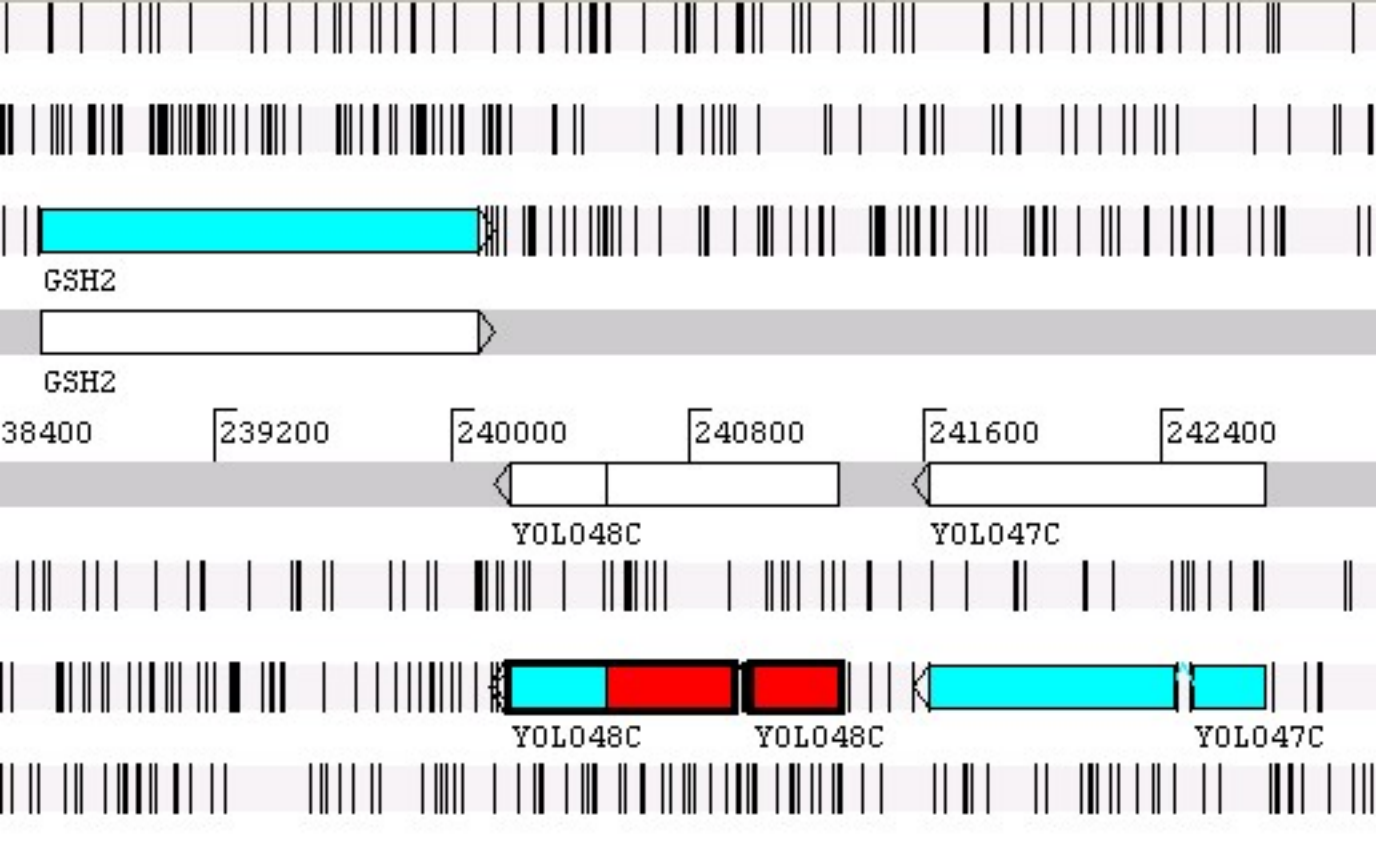

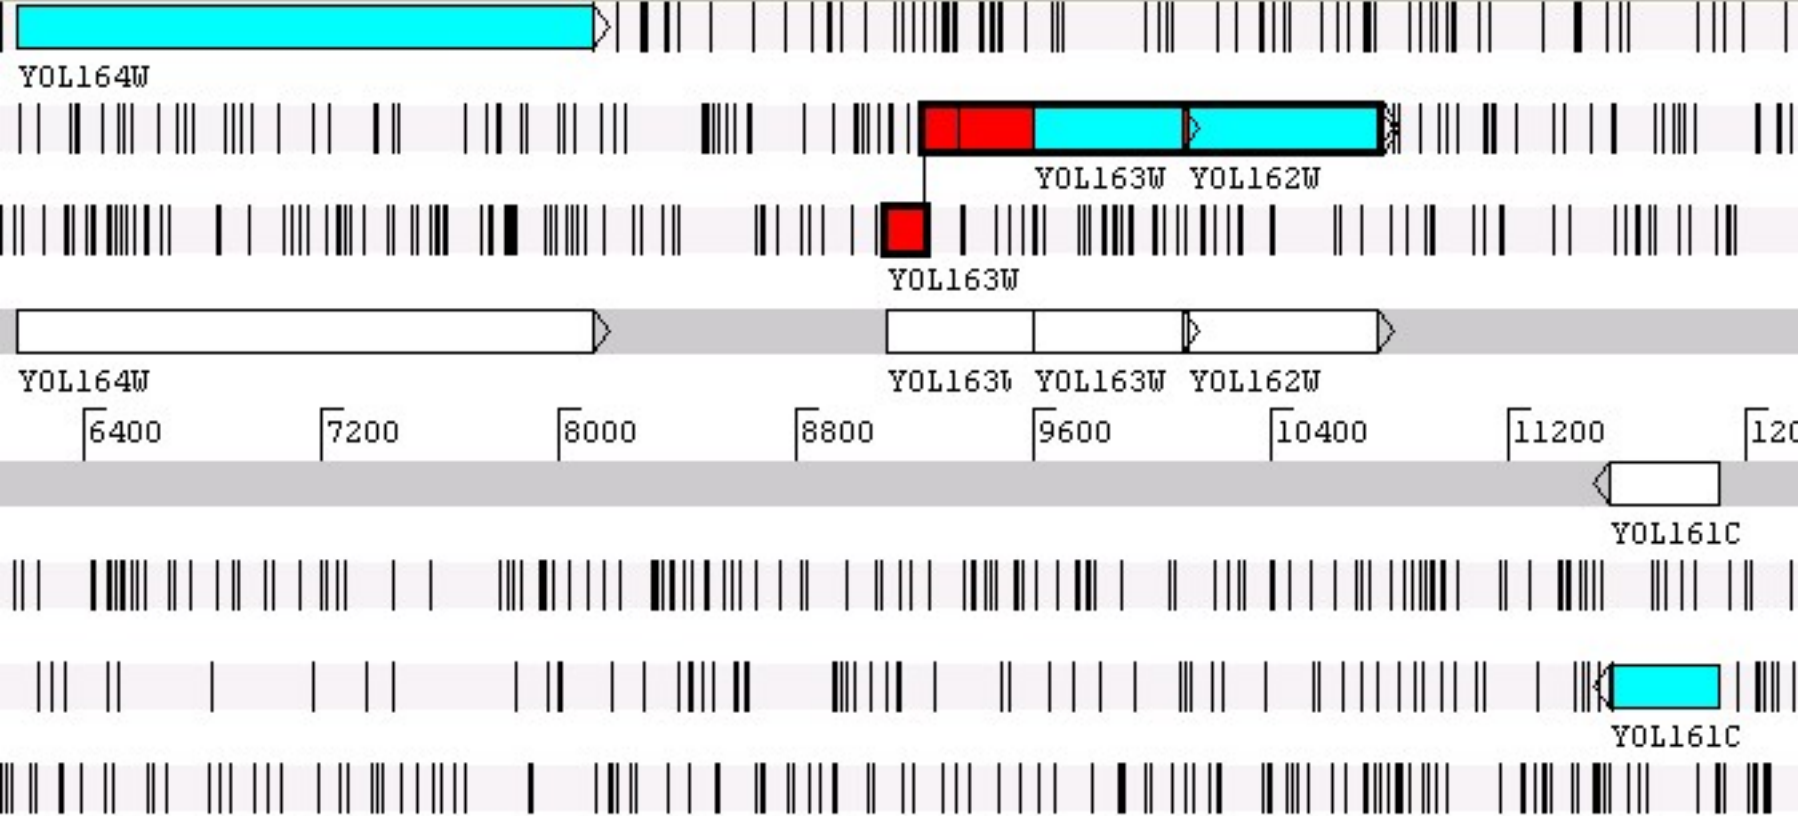

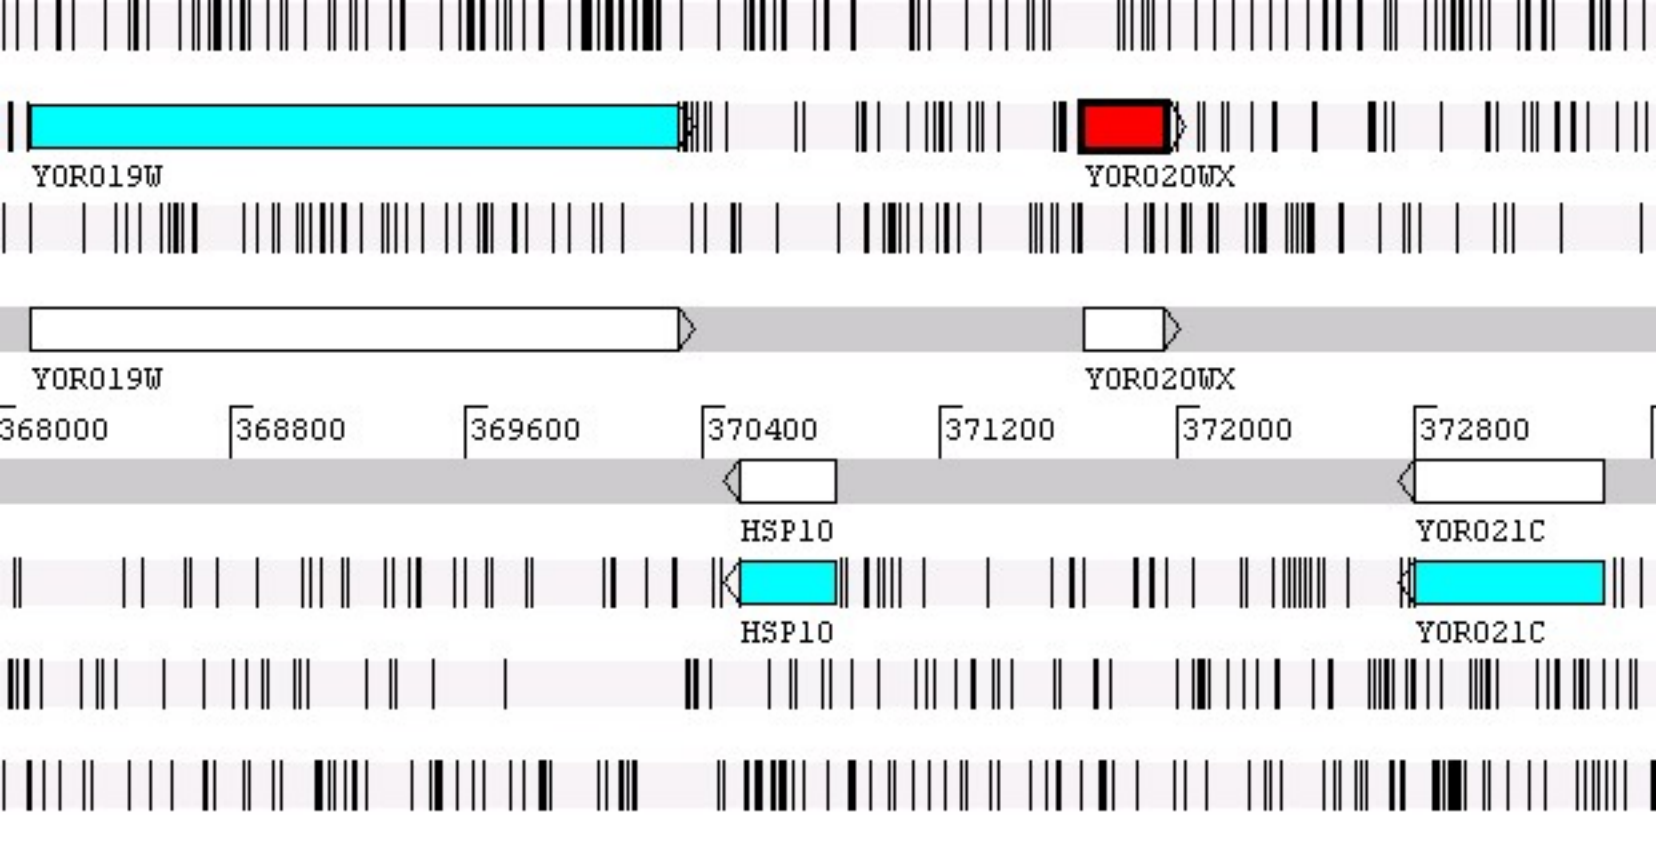

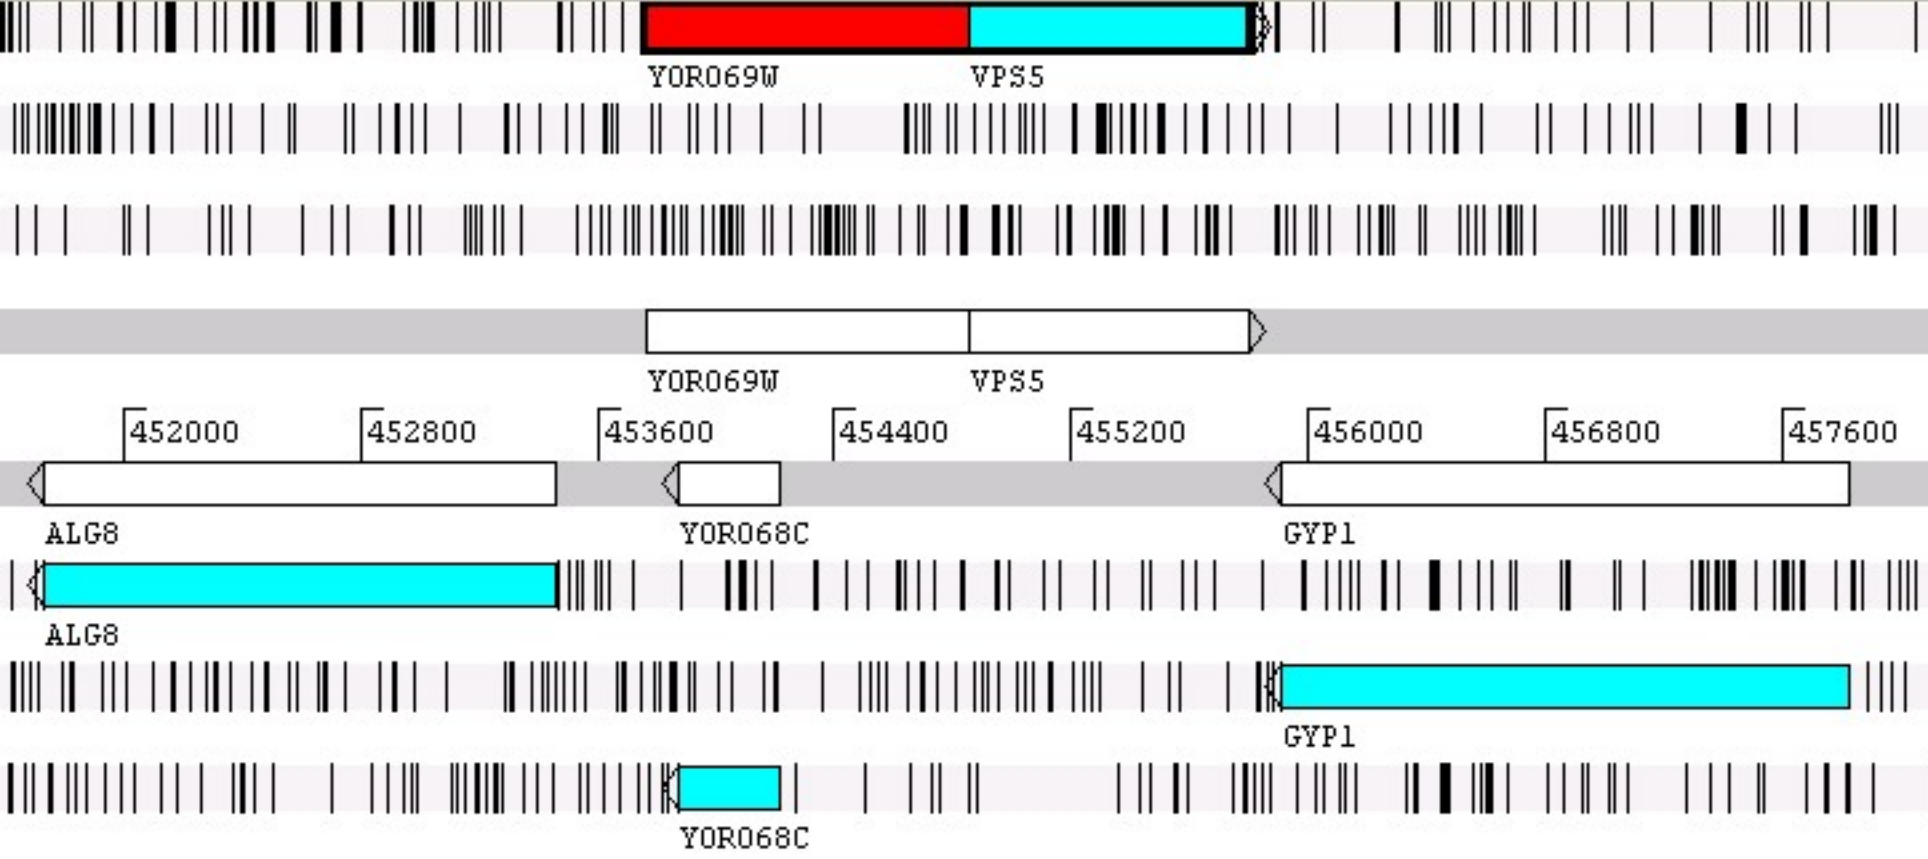

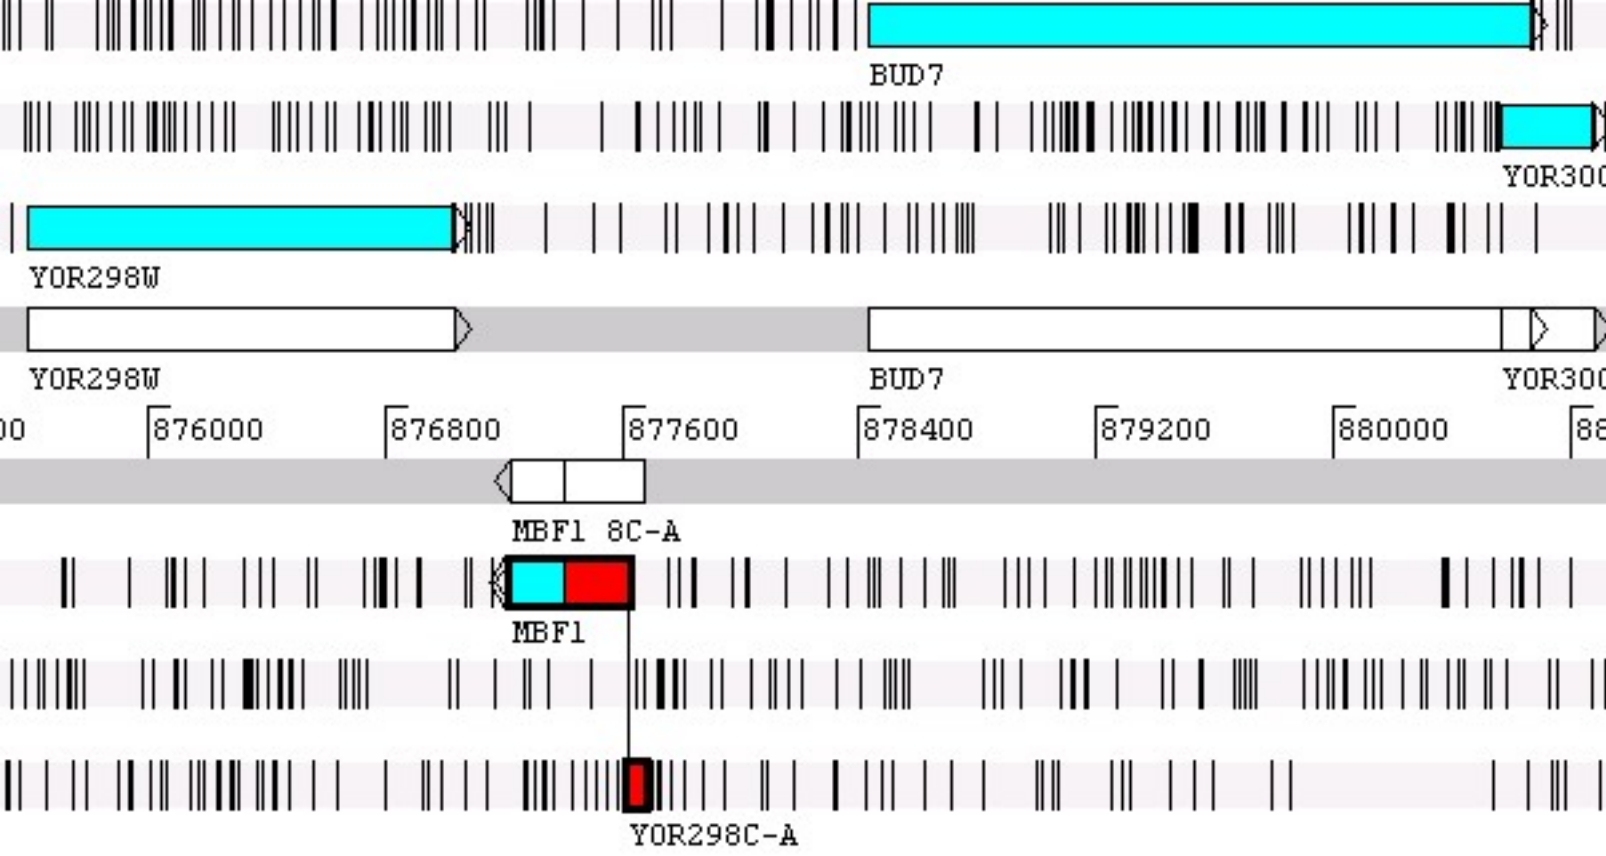

BUD7

YOR300

YOR298W

YOR298M

BUD7

YOR300

00

876000

876800

877600

878400

879200

880000

880800

MBF1 8C-A

MBF1

YOR298C-A

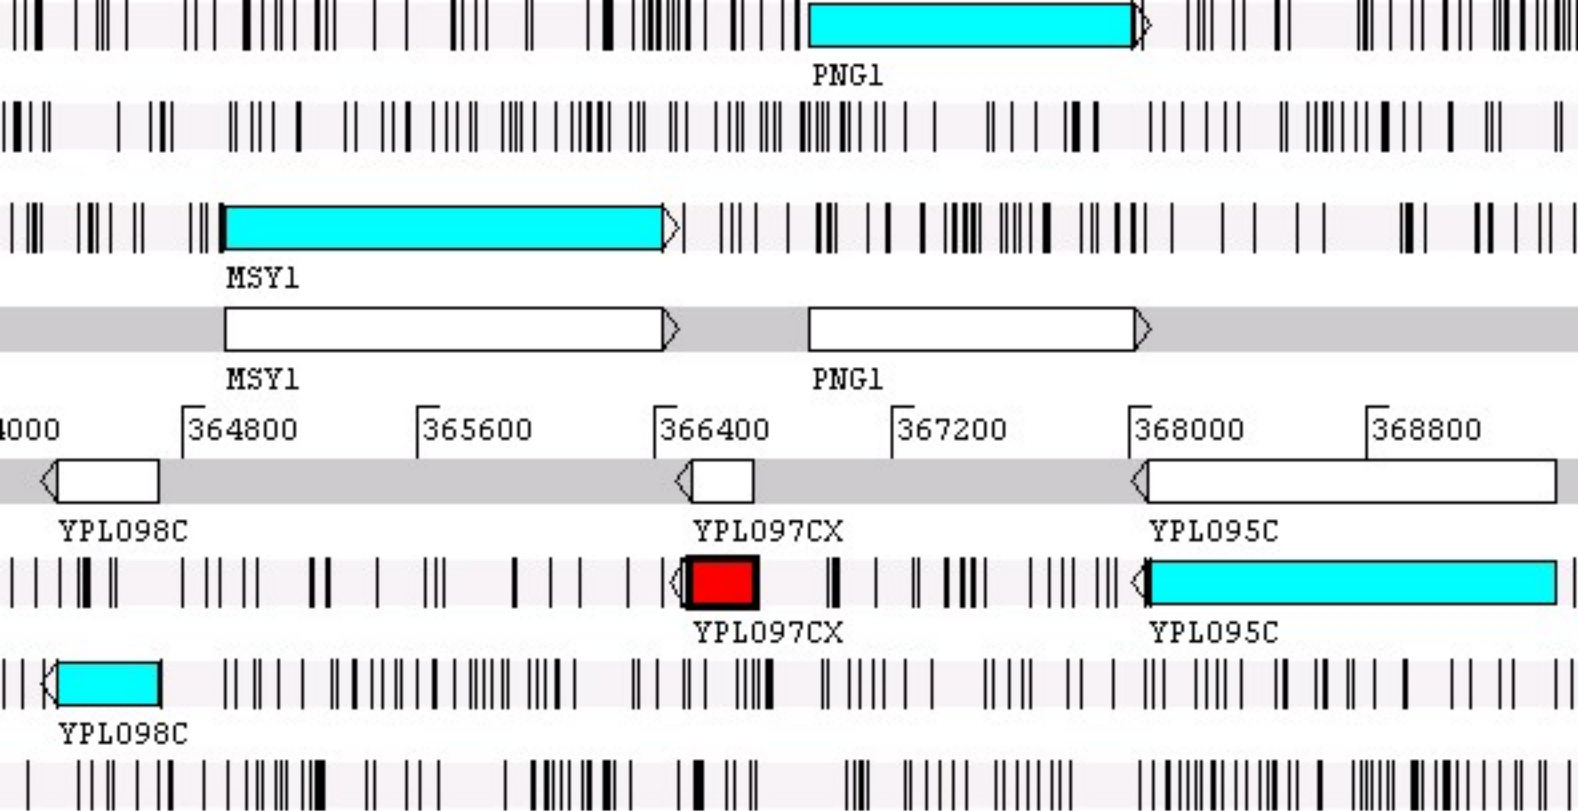



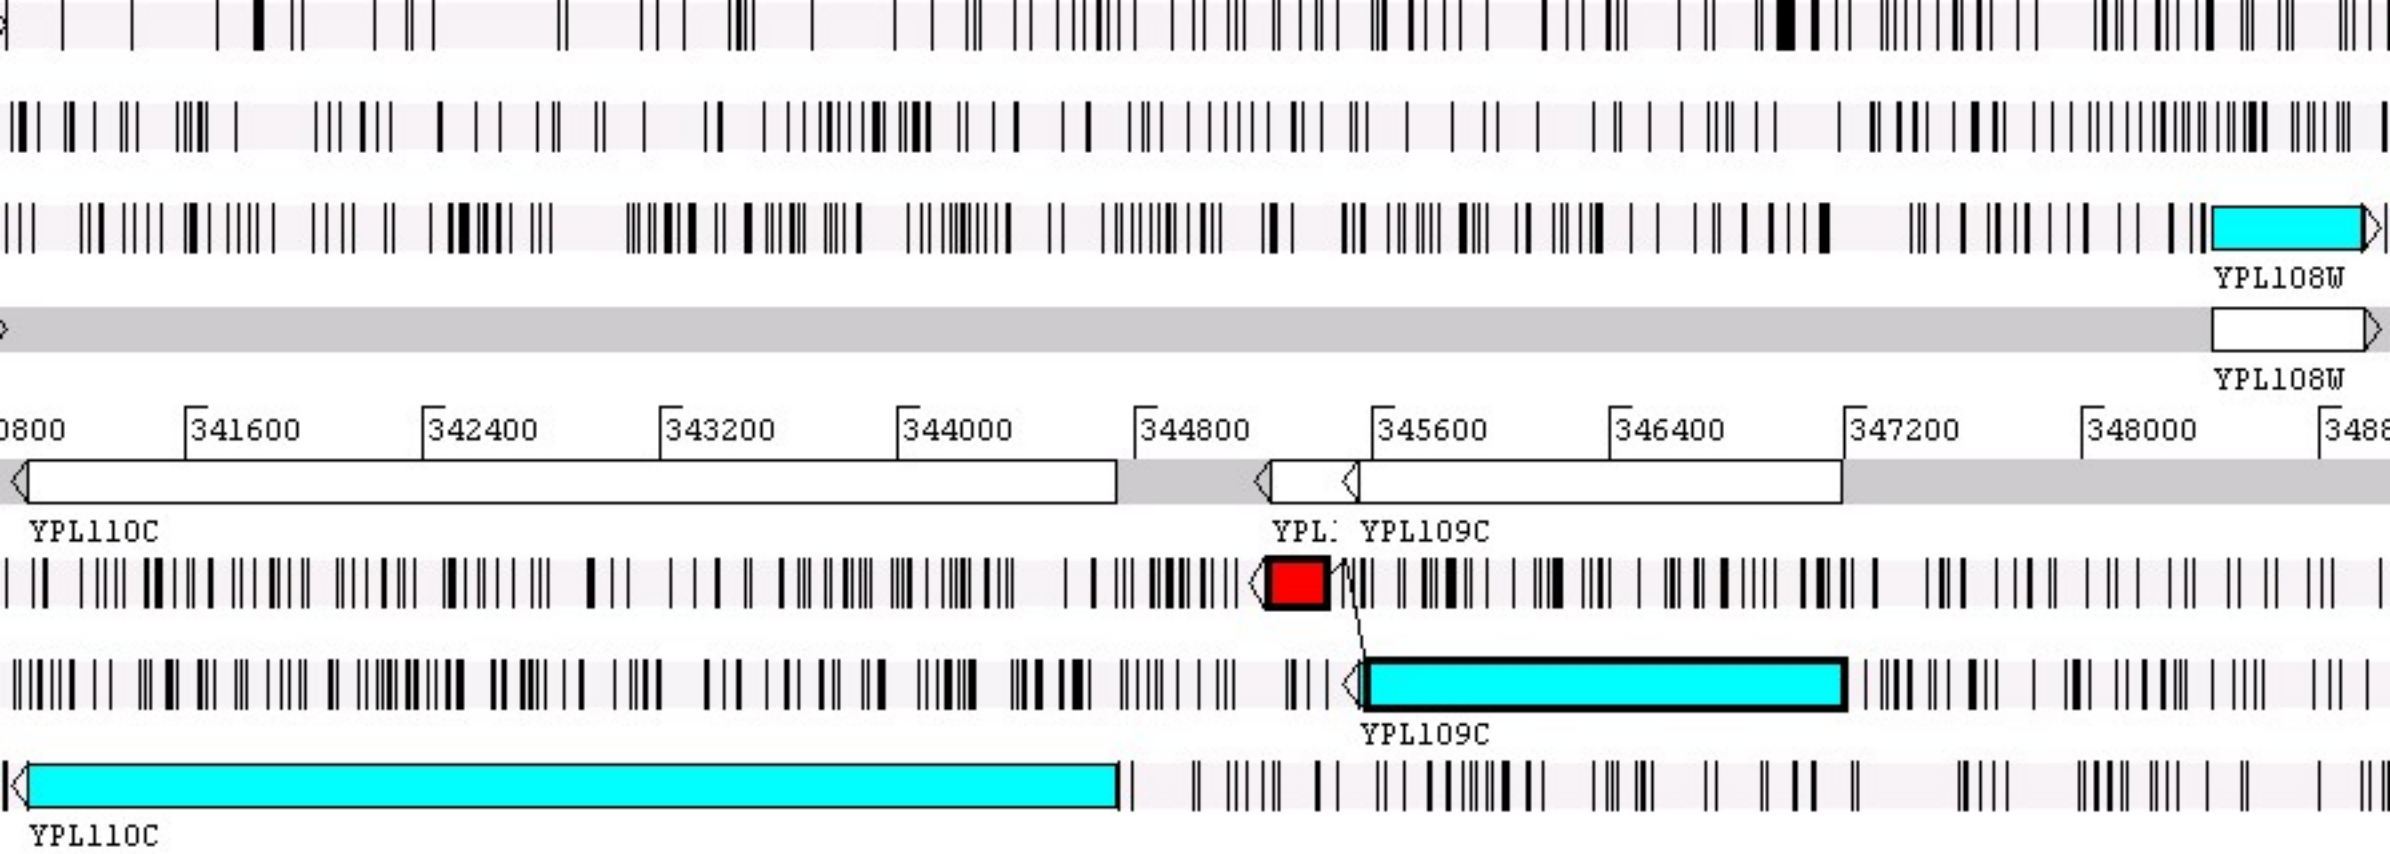

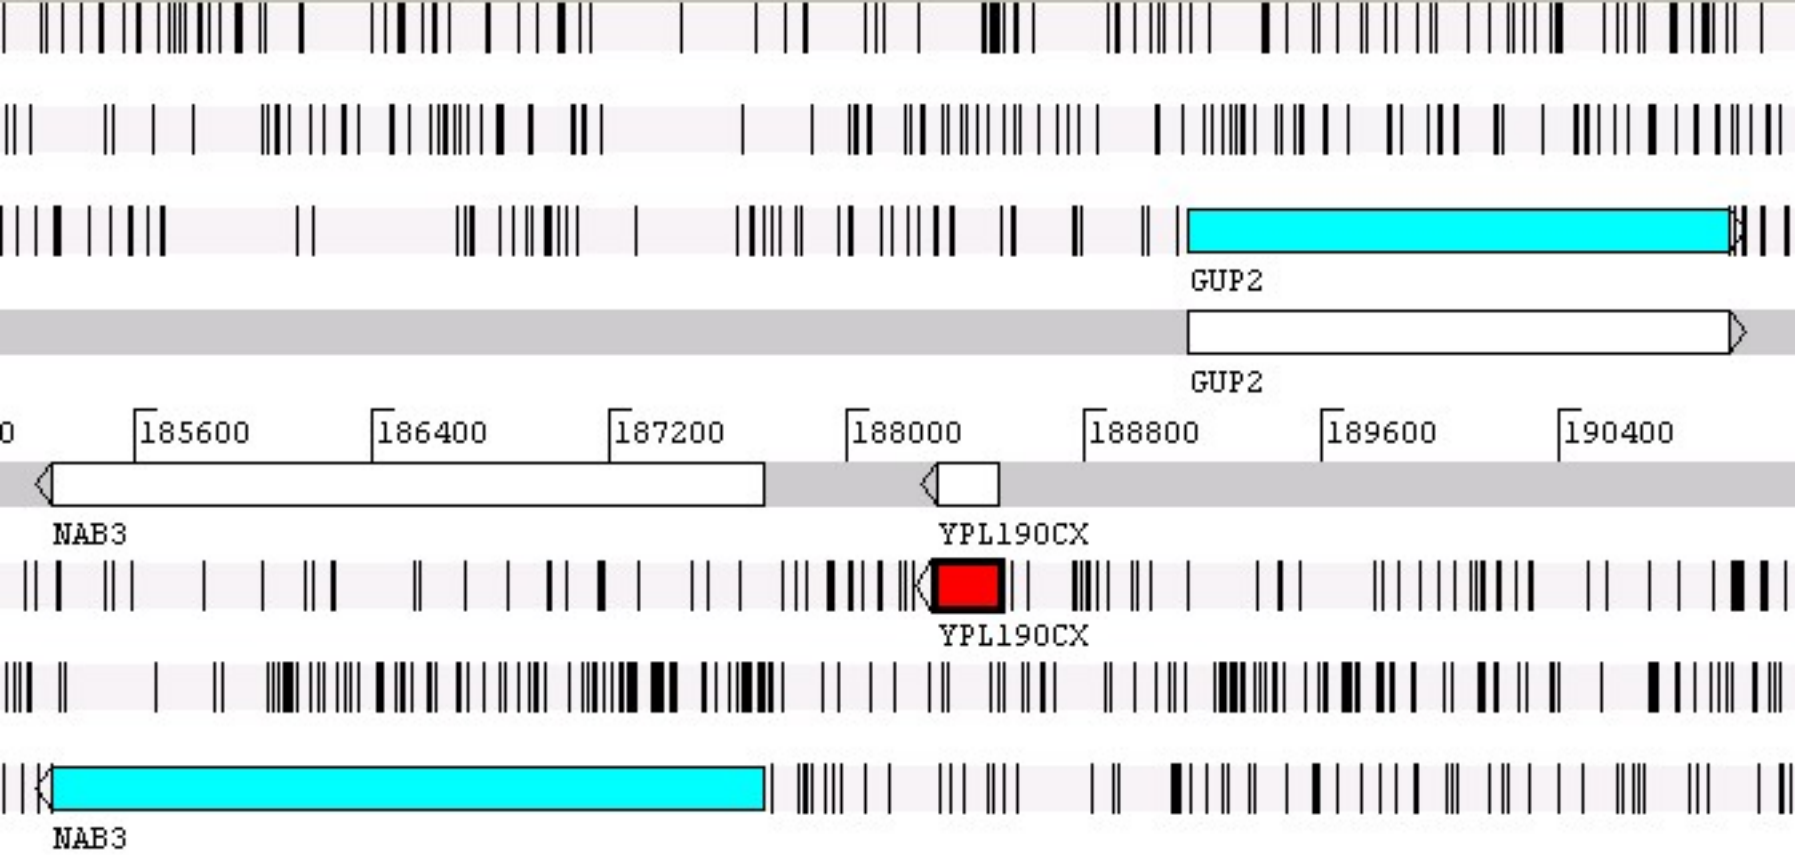

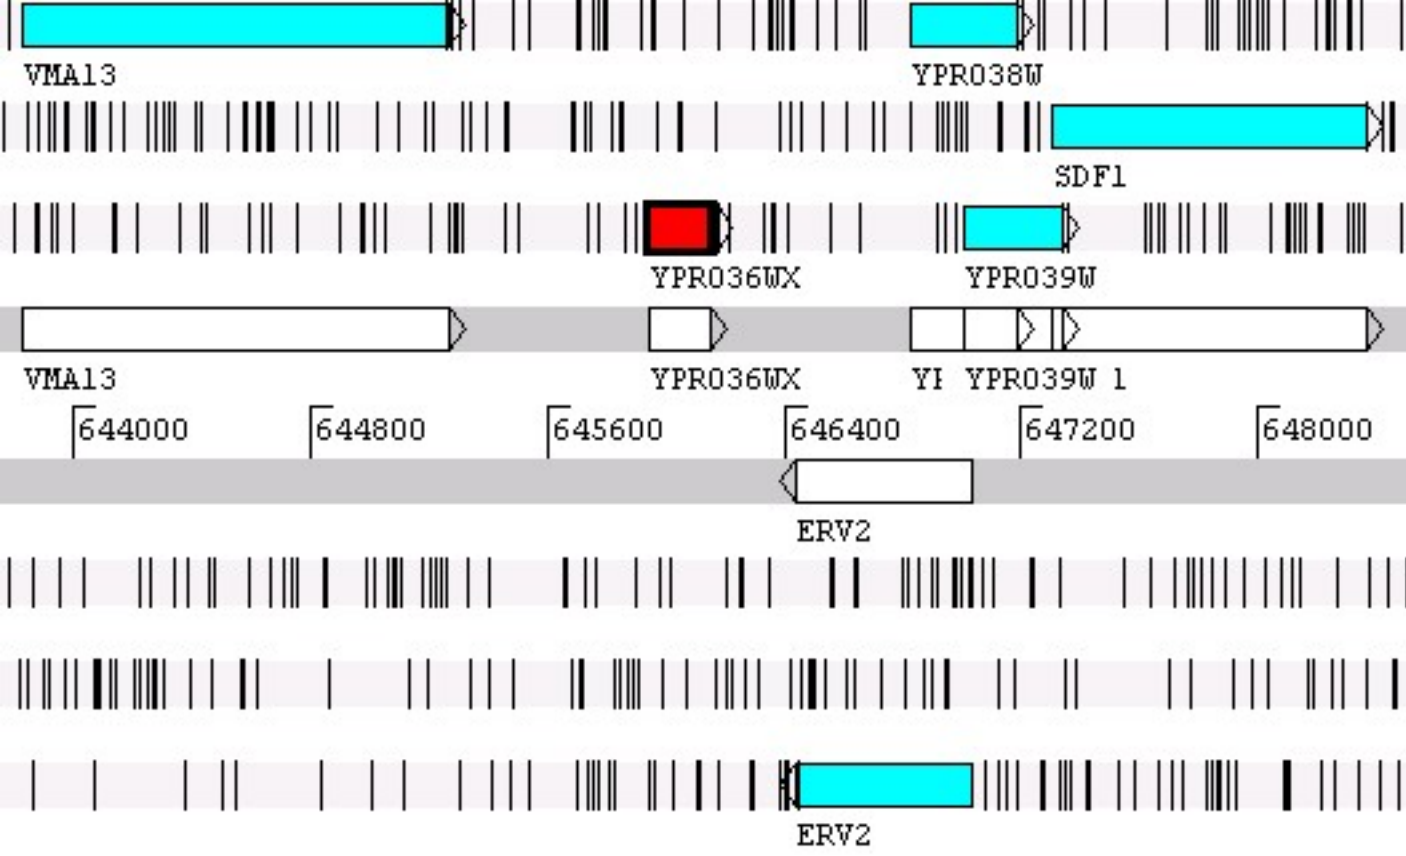

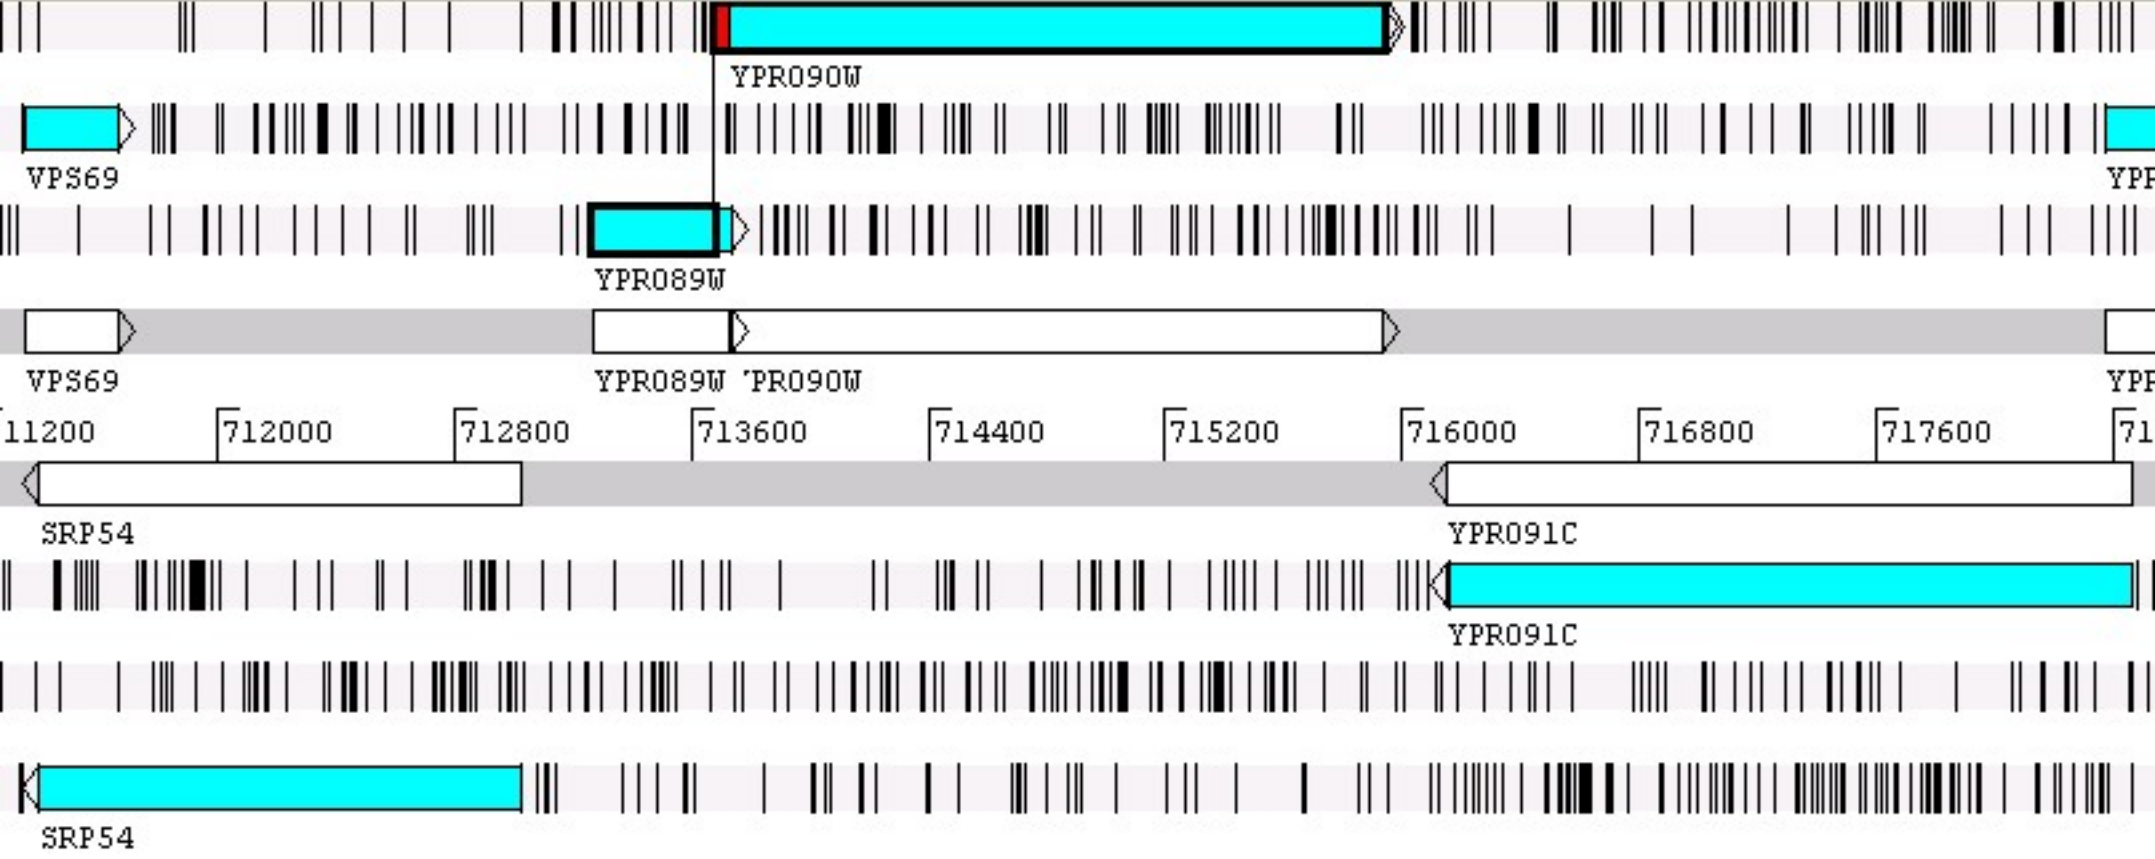

YPR100W

YPR097W

YPR097W

YPR100W

725600 726400 727200 728000 728800 729600

YPR098C YPR099C

YPR098C YPR YPR099C

Detailed description: This figure displays a genomic map of a DNA segment. The top part shows a light gray background with vertical black bars representing restriction sites. Two cyan arrows point to the right, labeled YPR100W and YPR097W. Below this, a white arrow labeled YPR097W and a white arrow labeled YPR100W are shown. A scale bar below the white arrows has tick marks at 725600, 726400, 727200, 728000, 728800, and 729600. Below the scale bar, two white arrows labeled YPR098C and YPR099C point to the left. At the bottom, a detailed view shows a cyan arrow labeled YPR098C, a red arrow labeled YPR, and a cyan arrow labeled YPR099C, all pointing to the left.

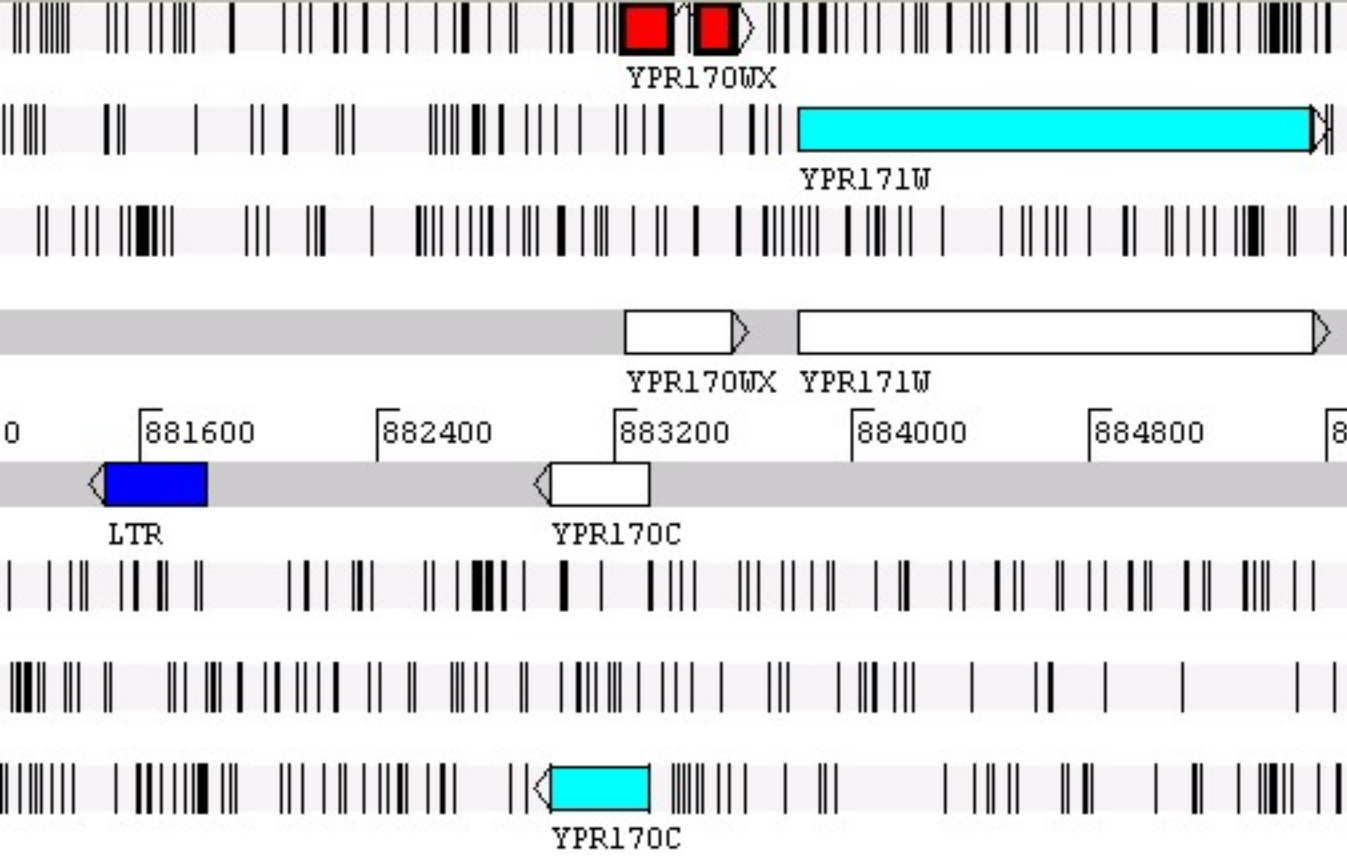

Supplement: gb-2003-4-7-r45-s6.pdf [file gb-2003-4-7-r45-s6.pdf]
